# Supplementary figures and images for: Pyridine-catalyzed desulfonative borylation of benzyl sulfones
Source: Royal Society of Chemistry journal article supplement (doi:10.1039/c9ob01099h), 2019-01-01

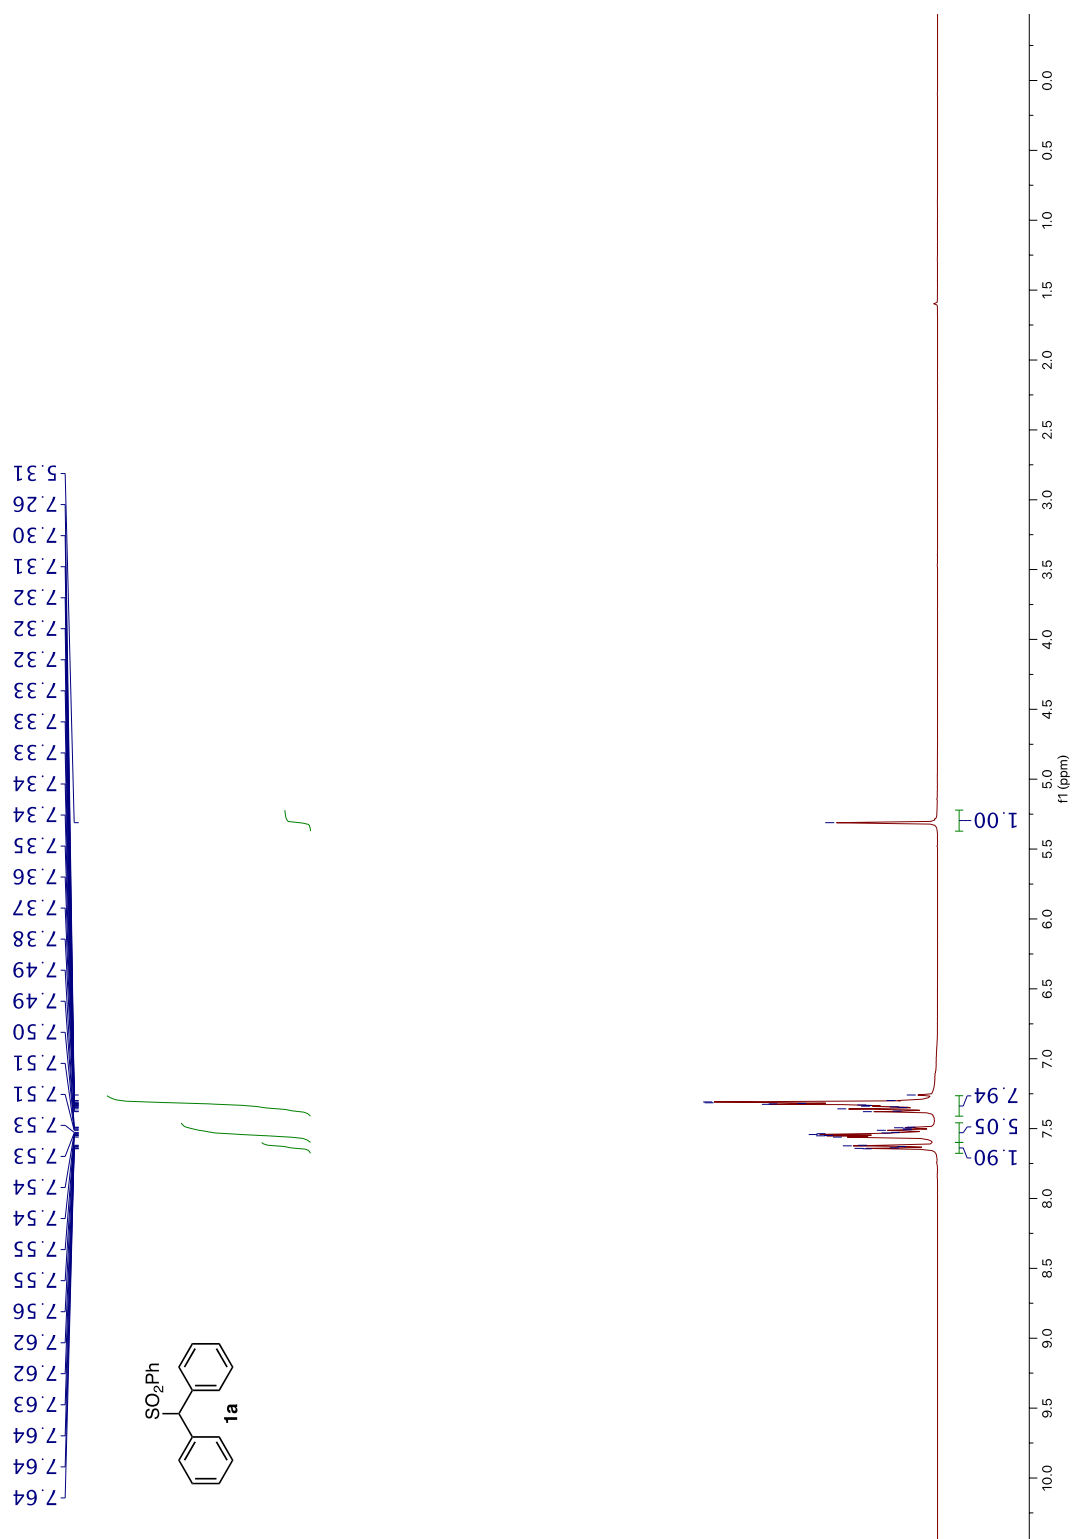

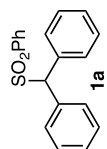

77.32  
77.00  
76.68  
76.40

138.20  
133.41  
132.91  
129.92  
128.94  
128.63  
128.59  
128.56

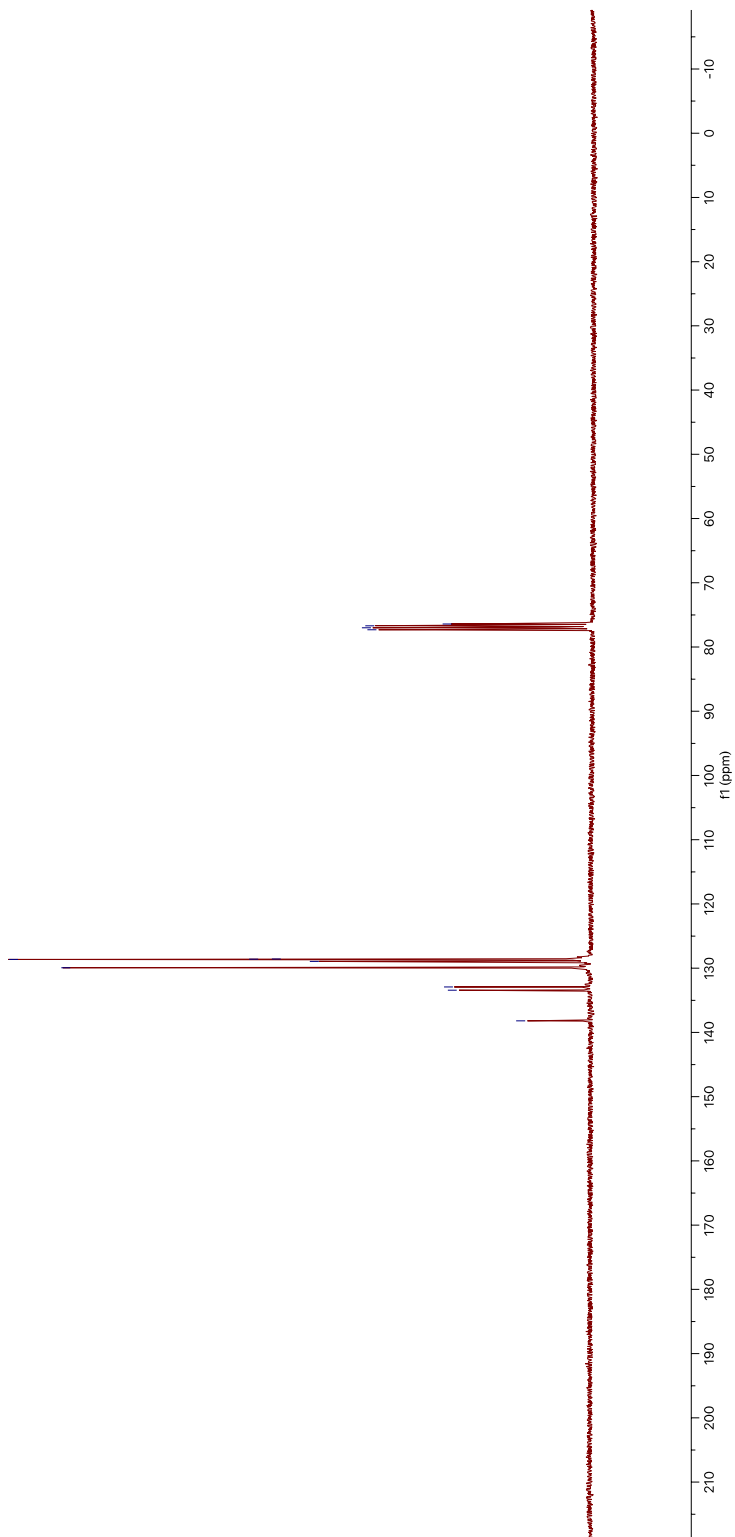

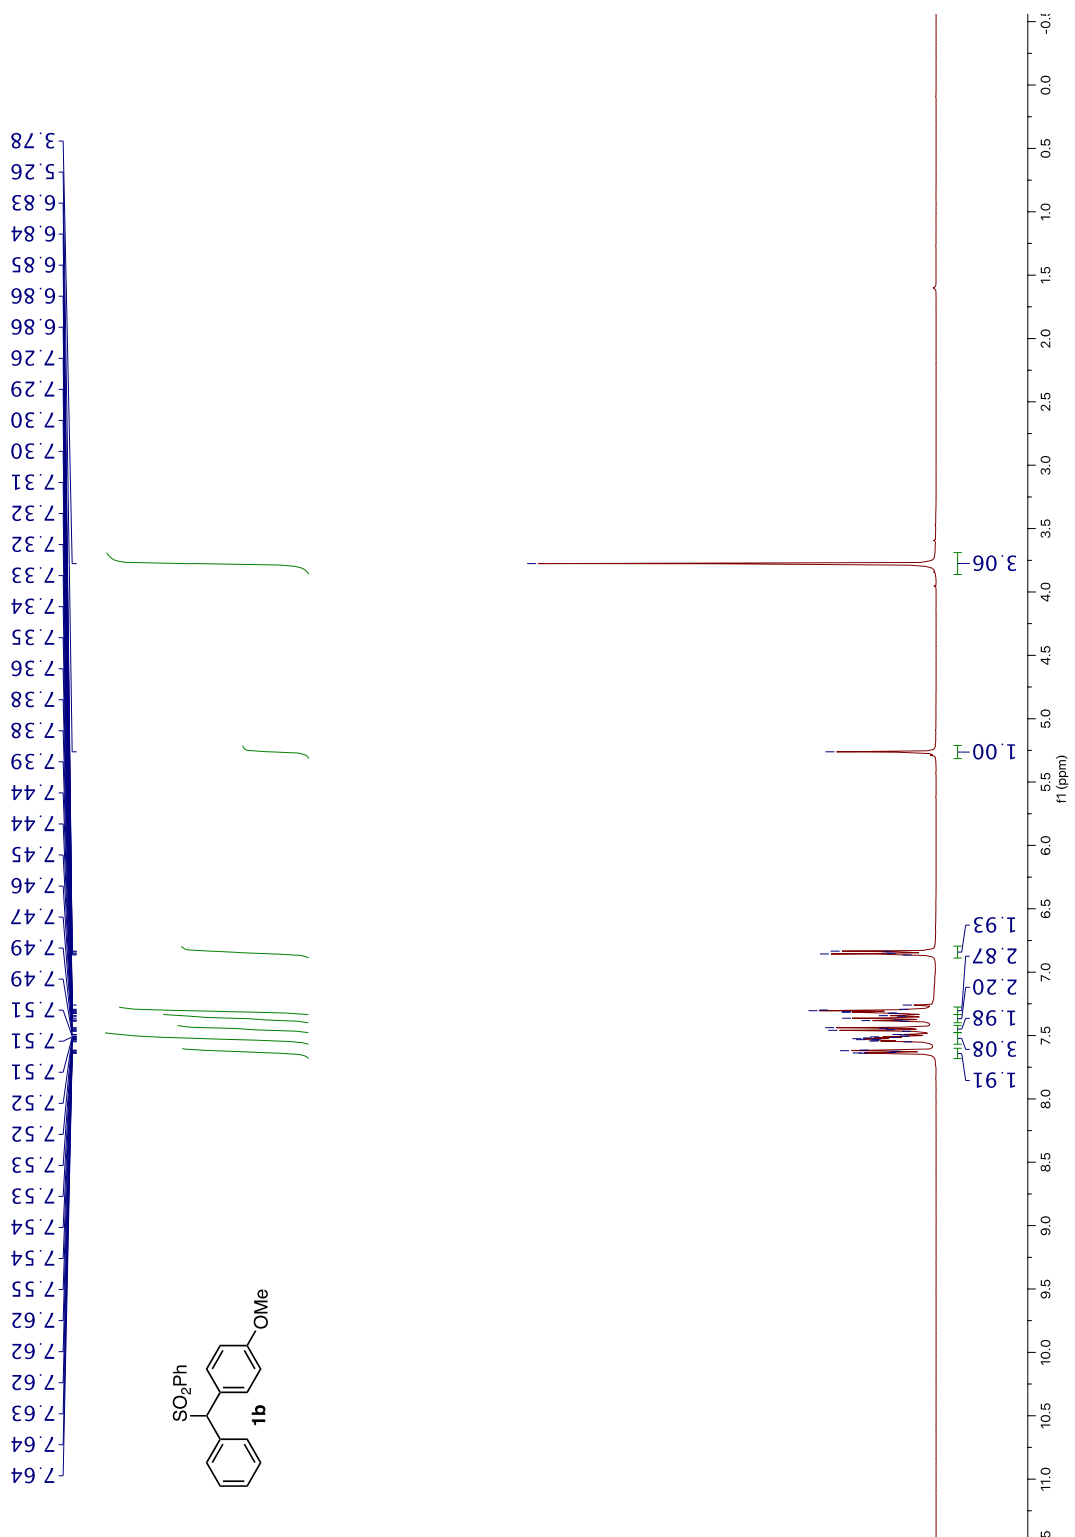

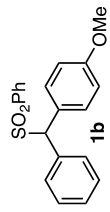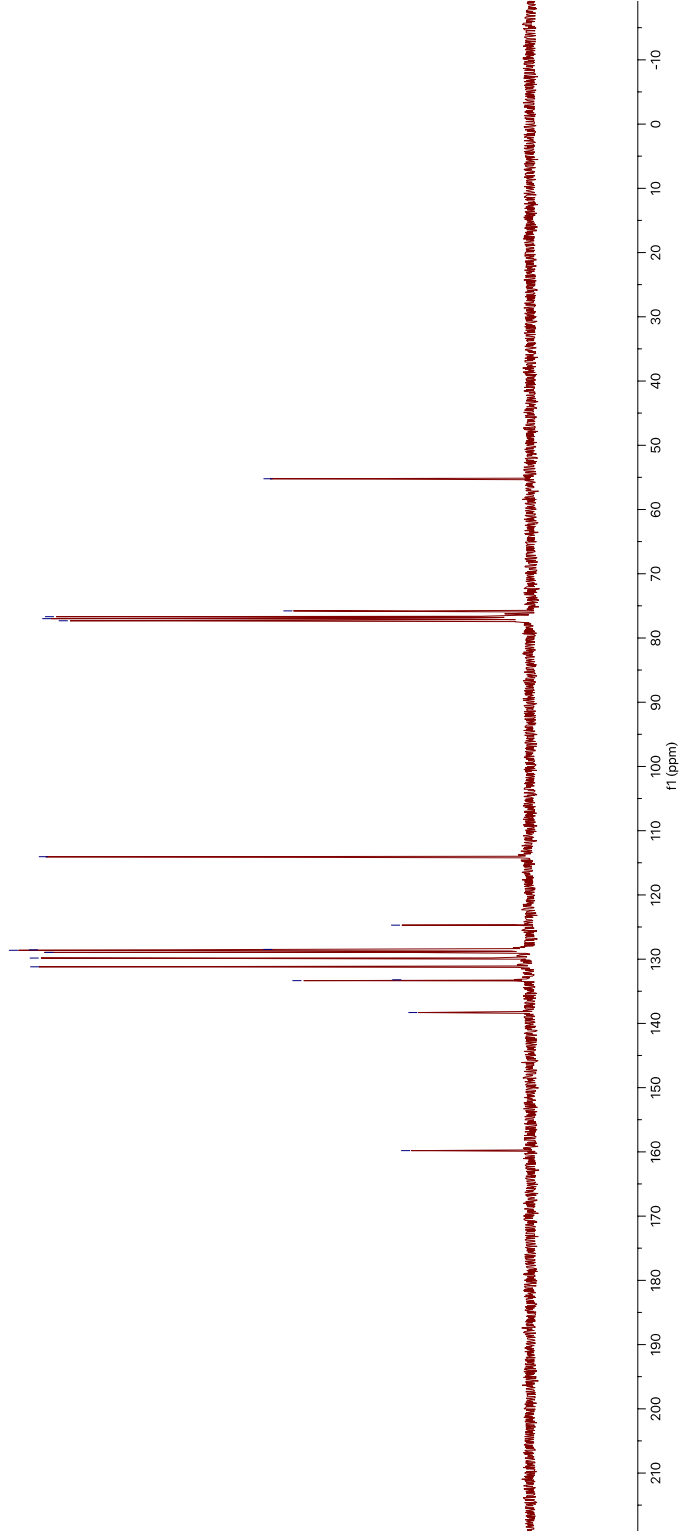

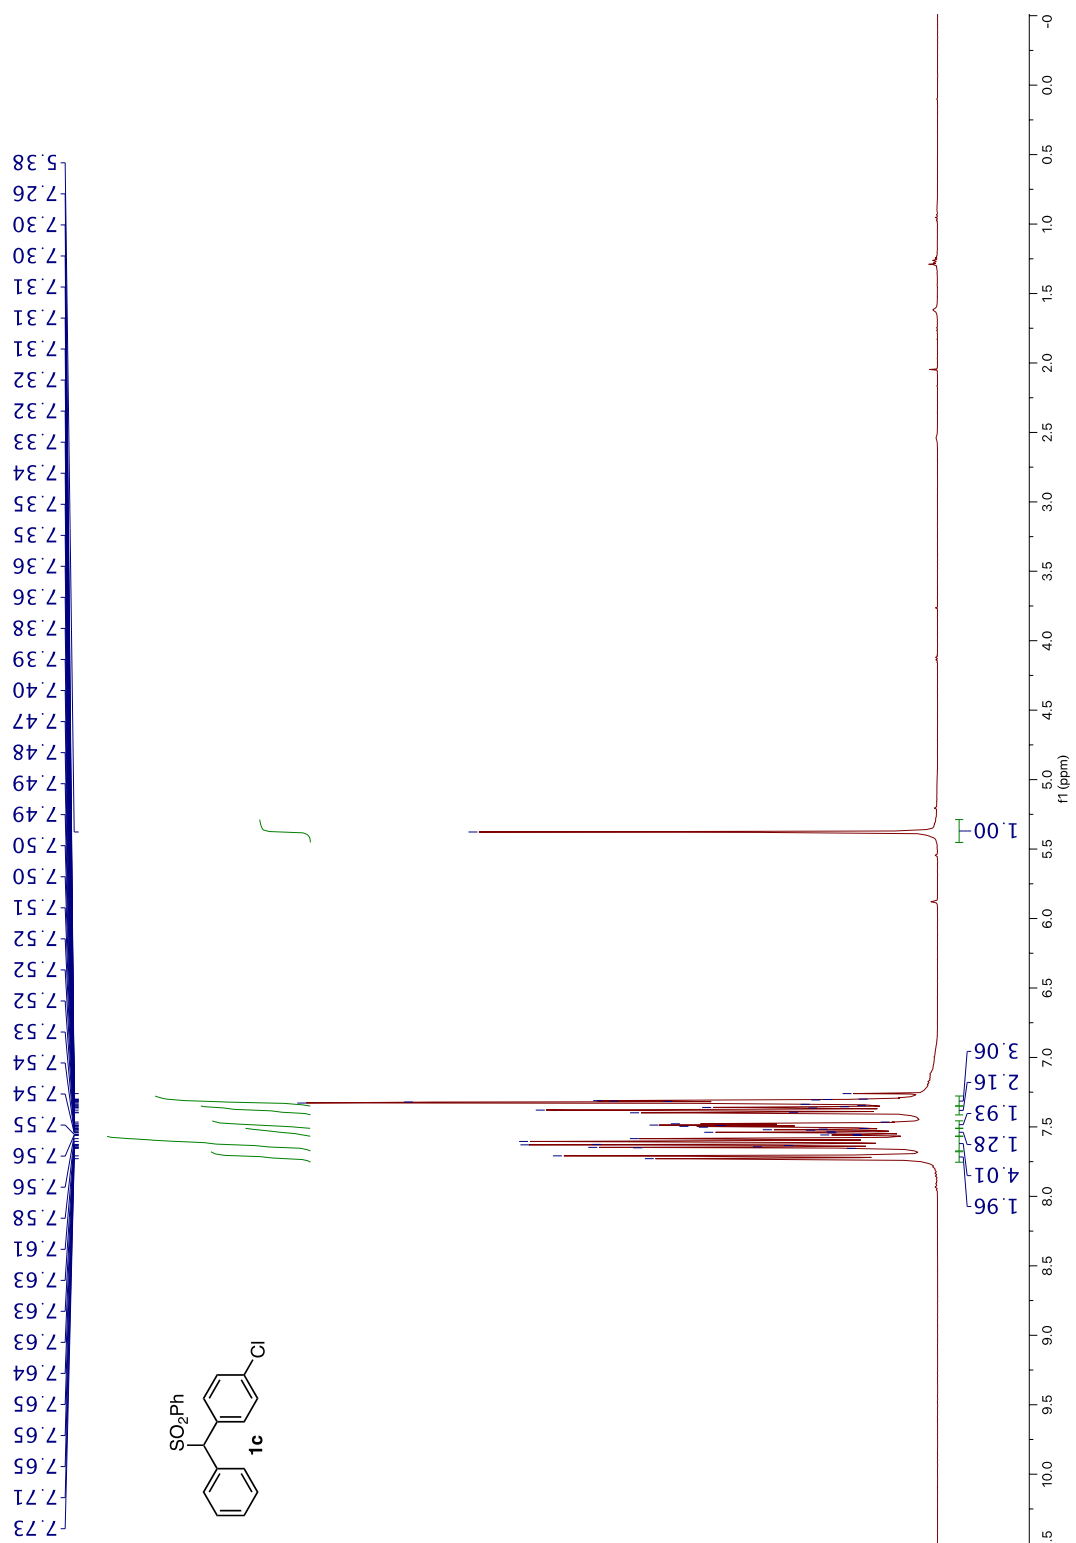

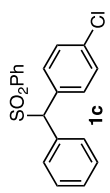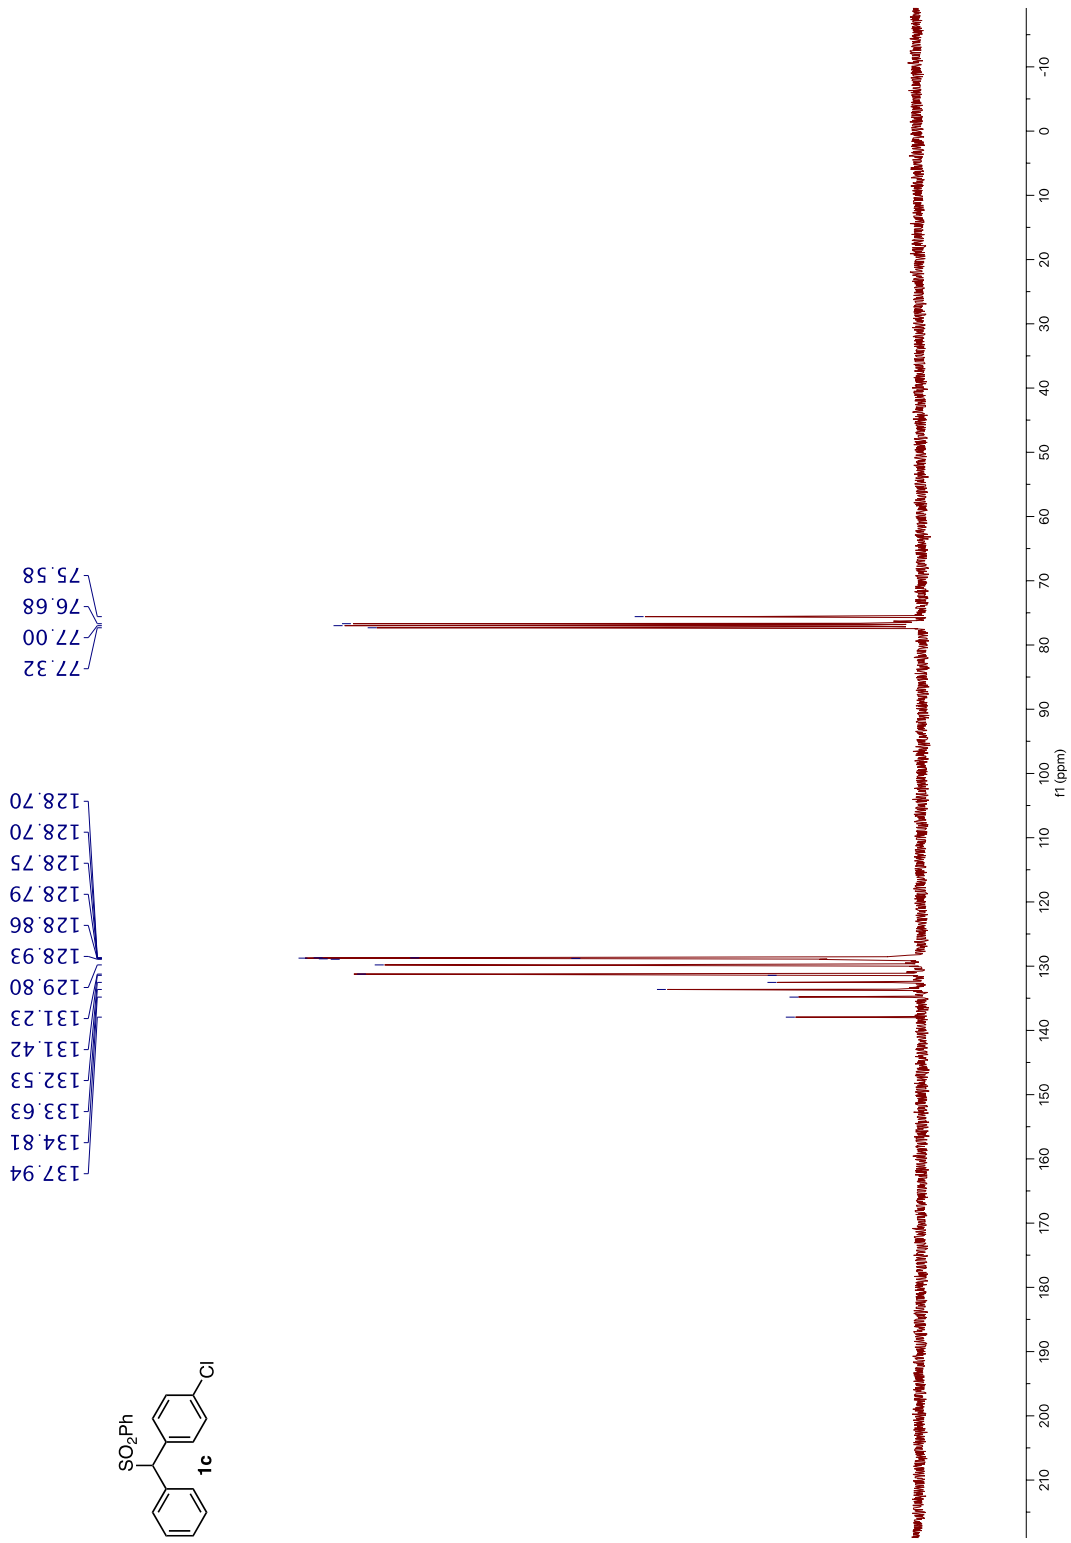

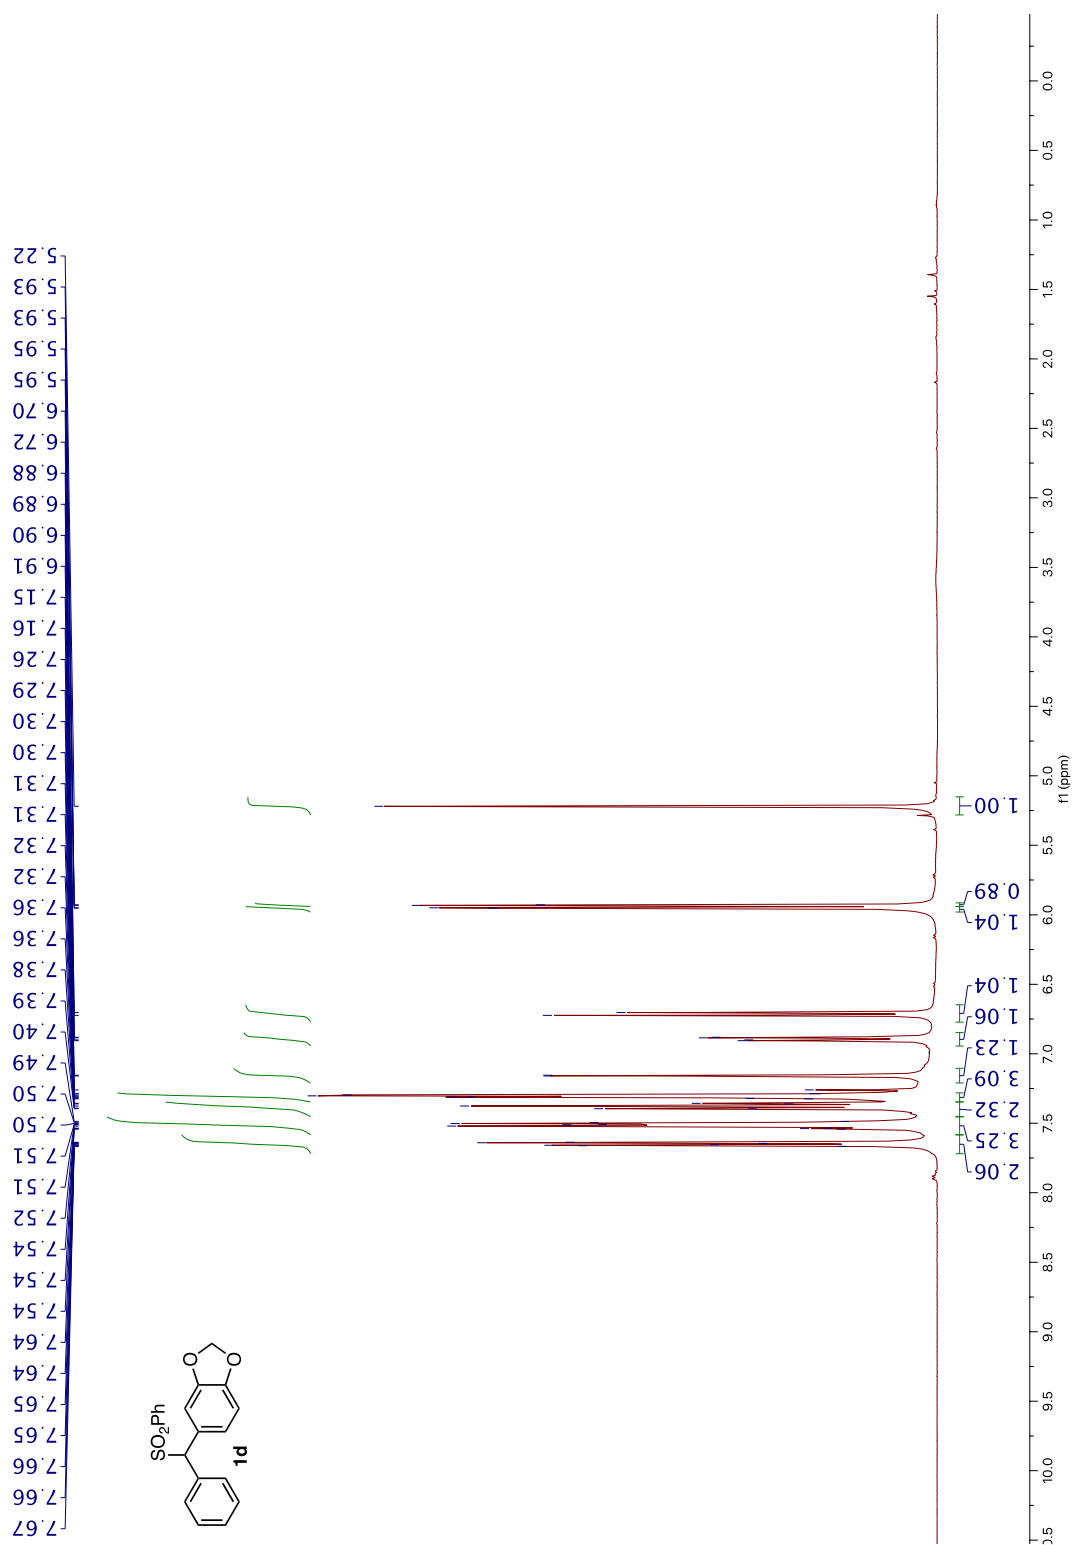

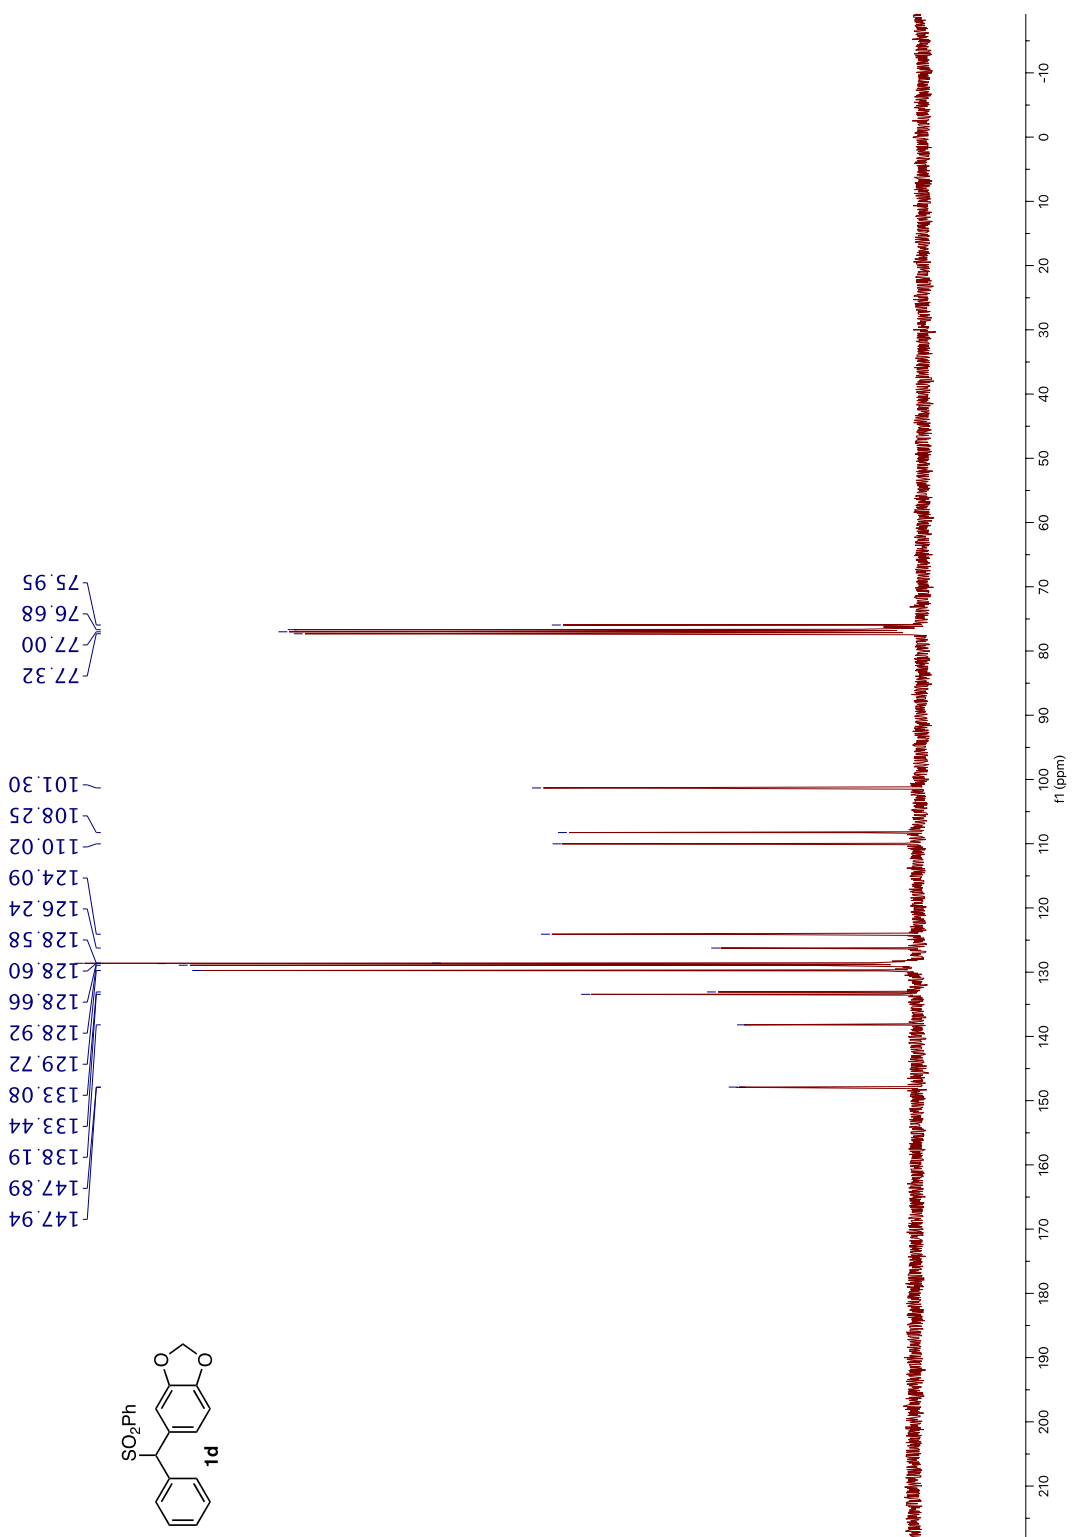



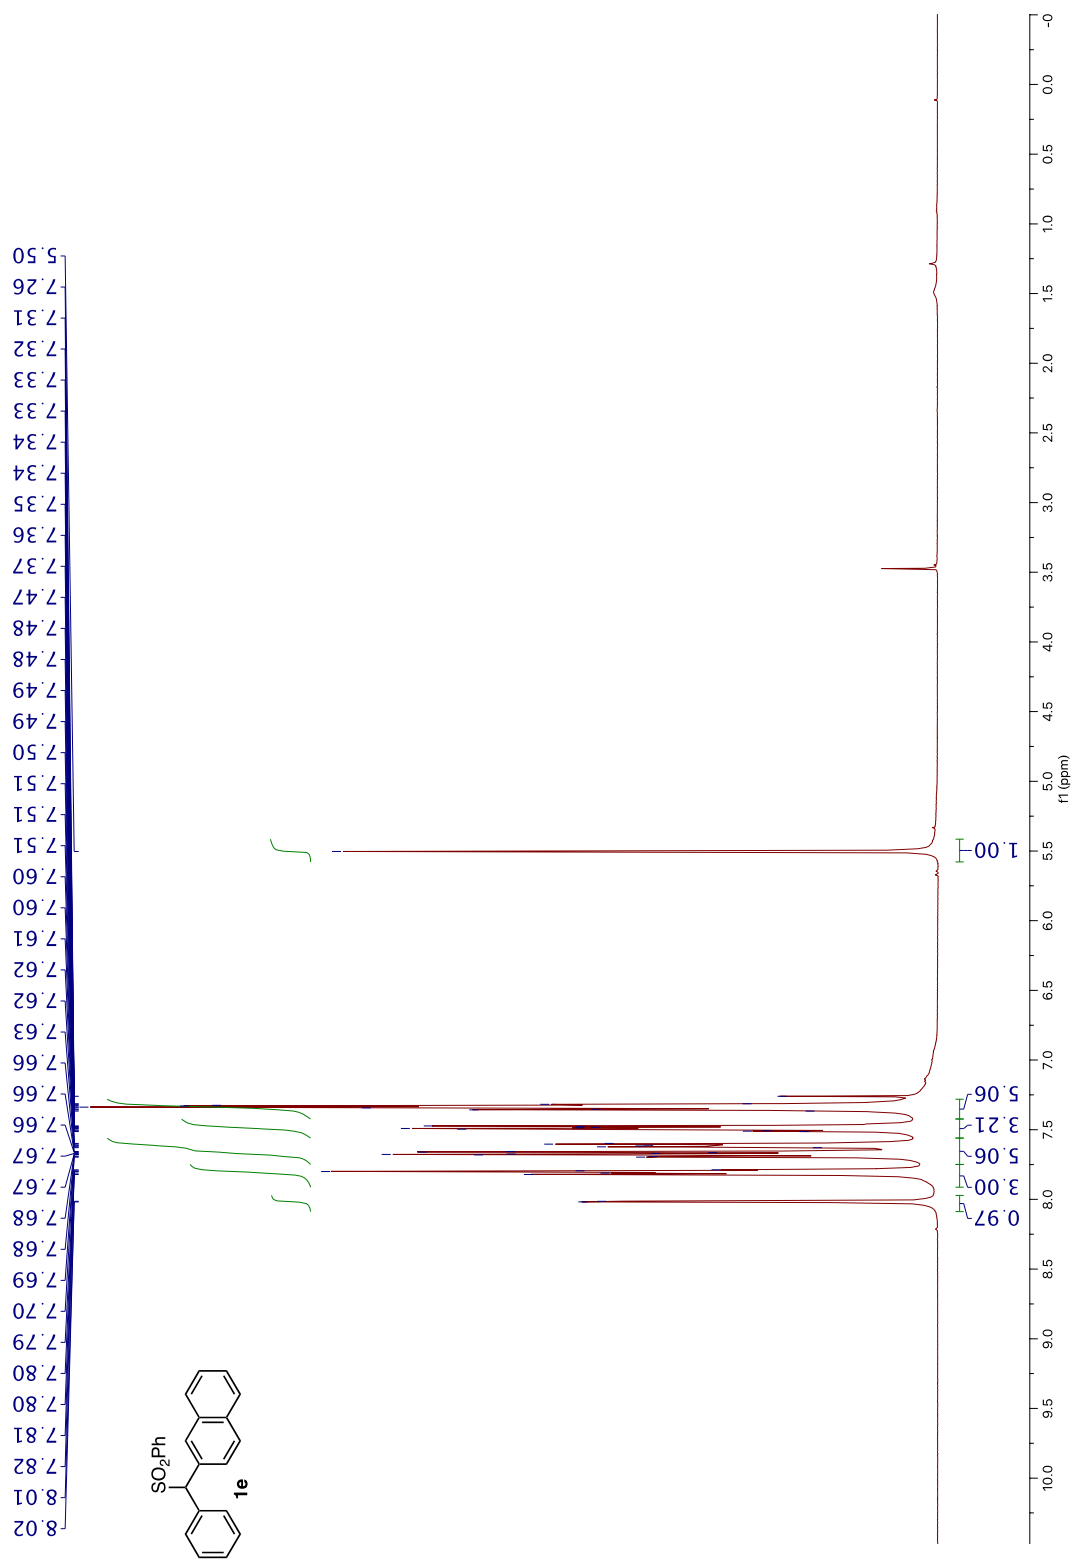

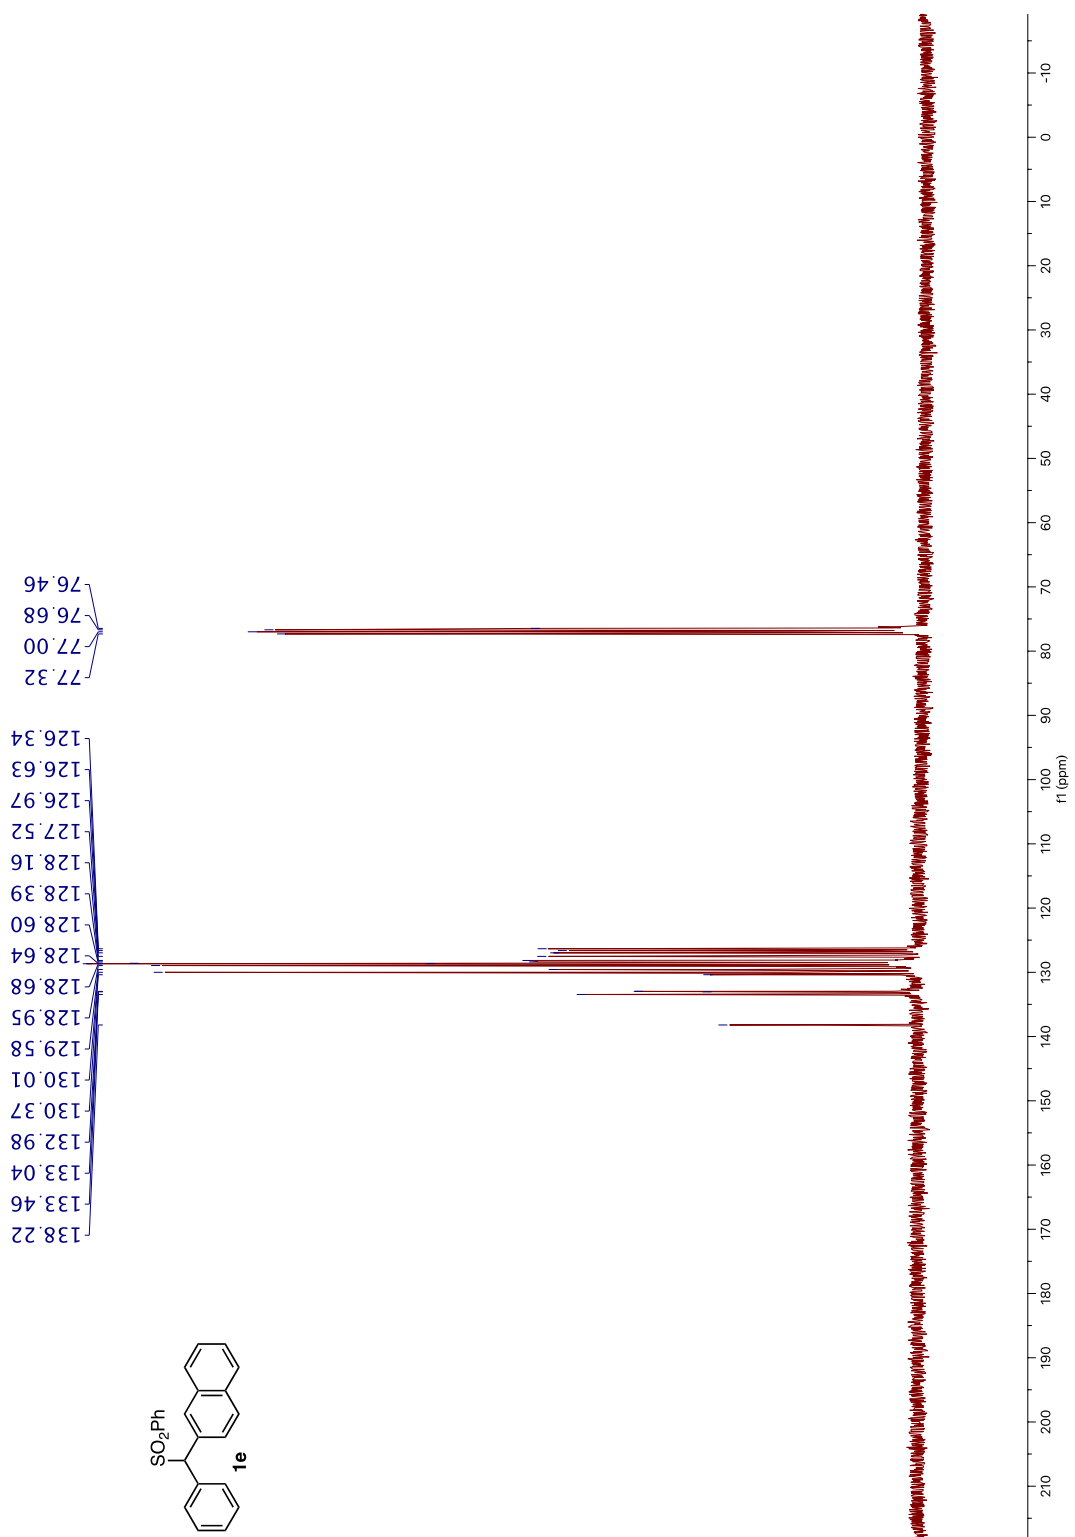

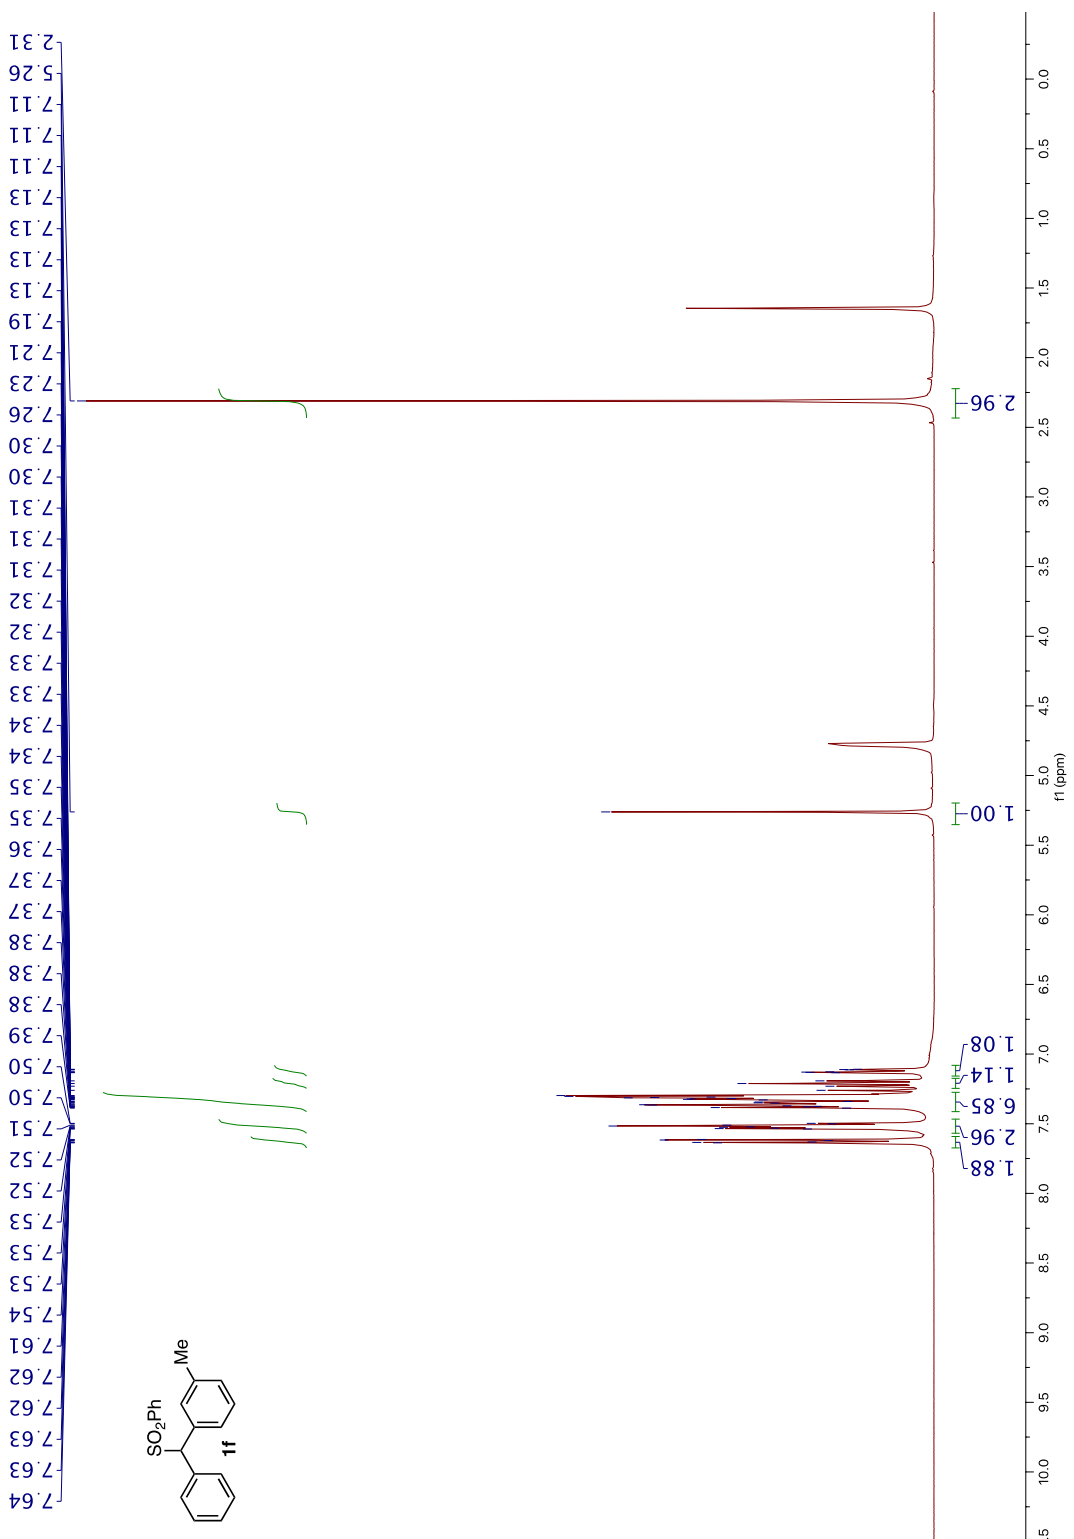

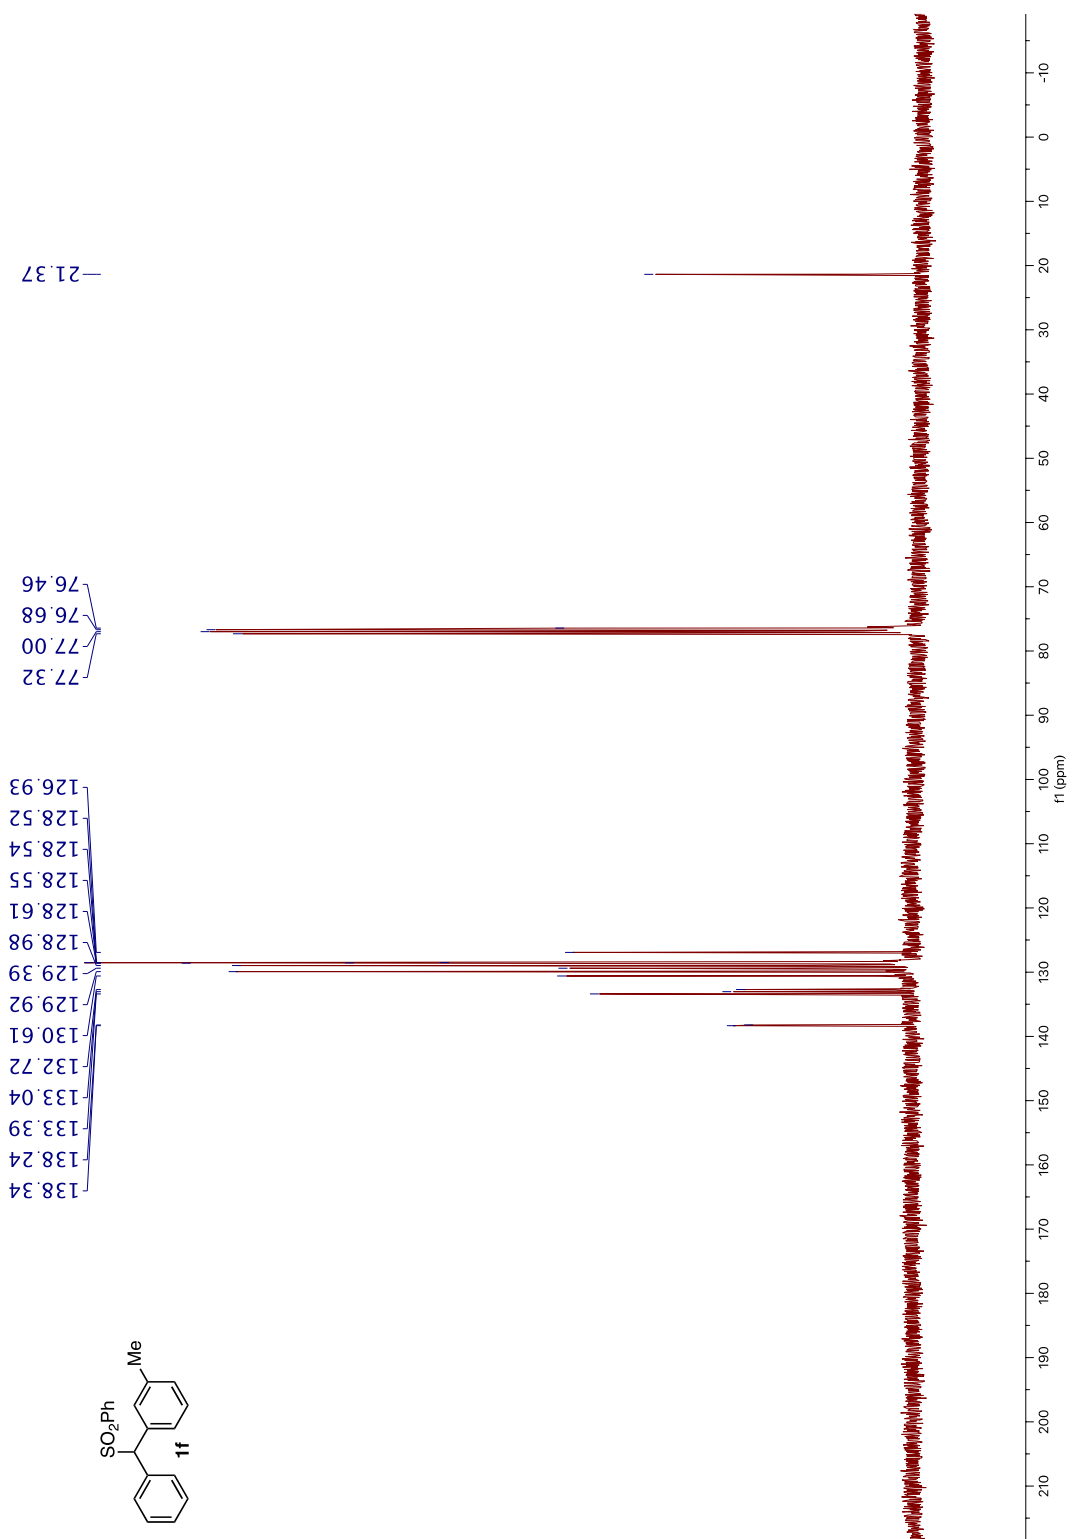

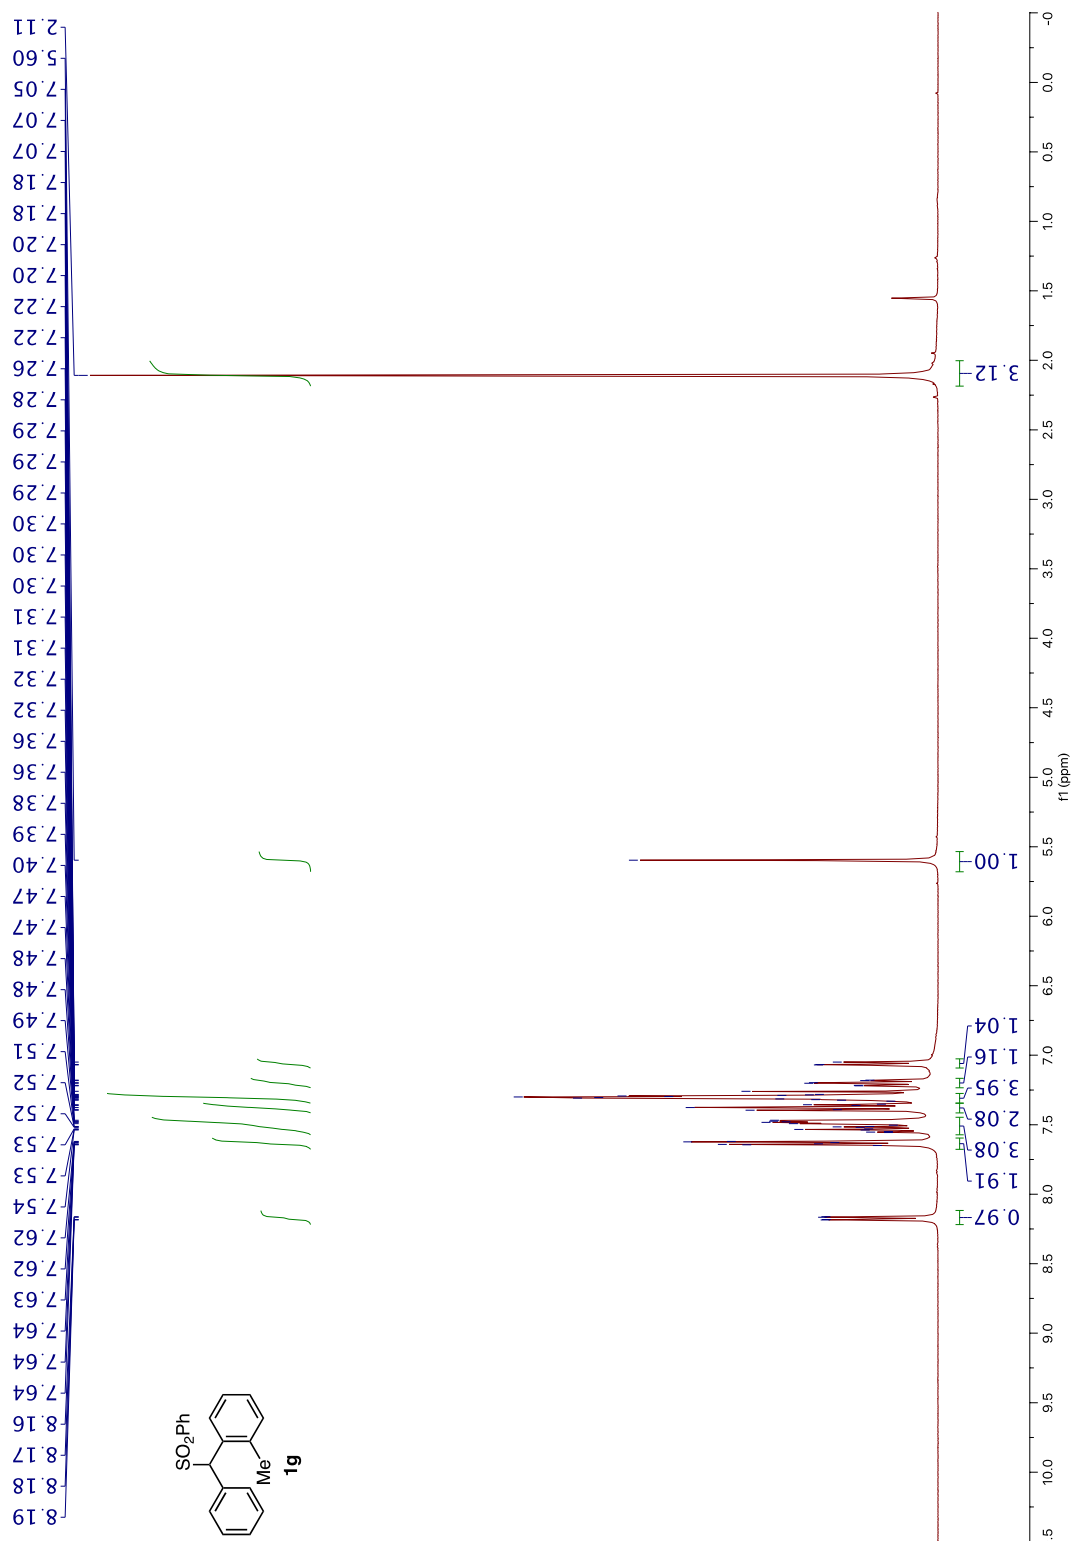

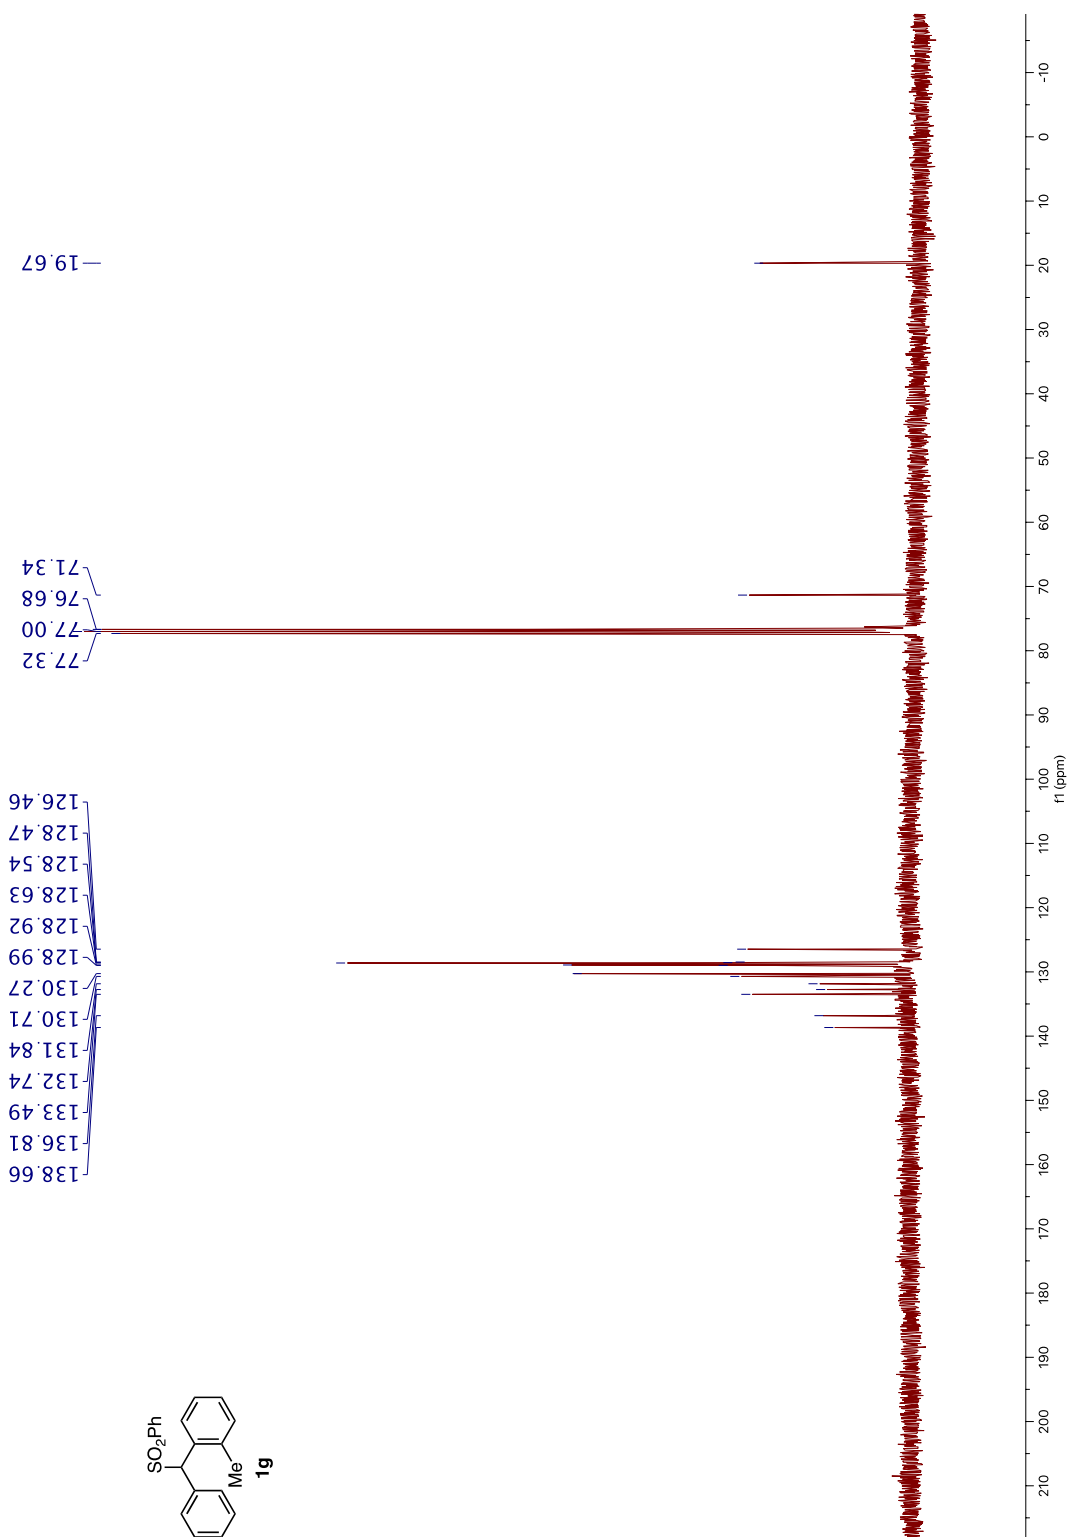

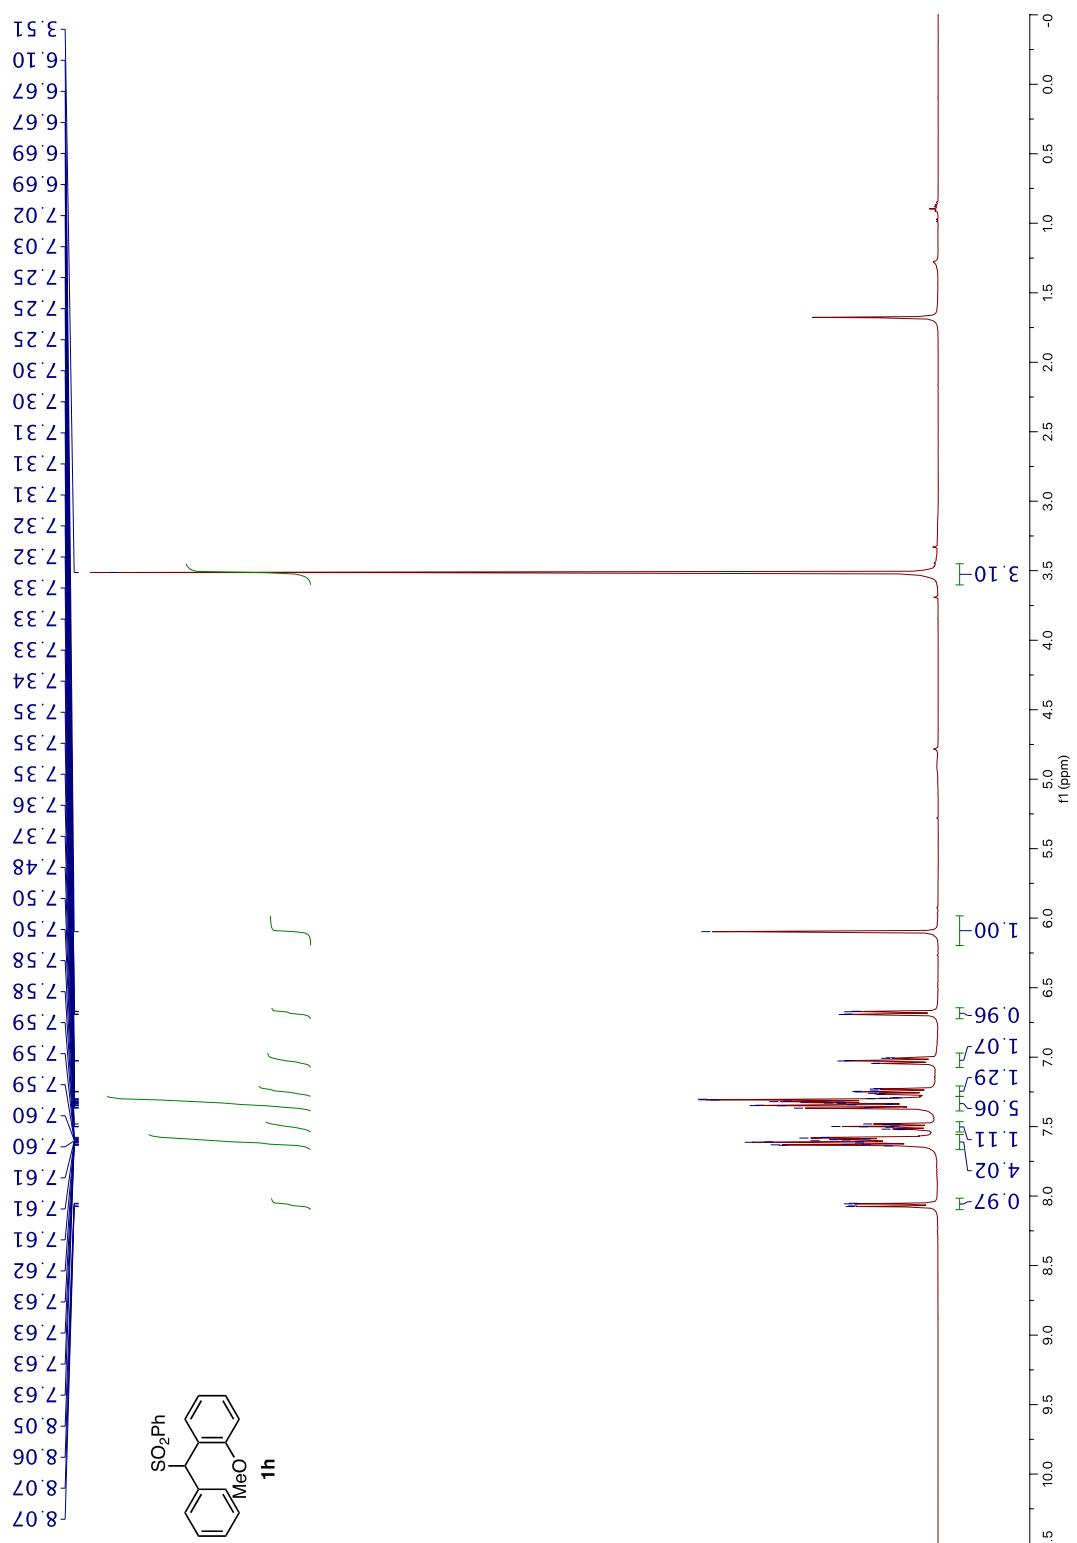

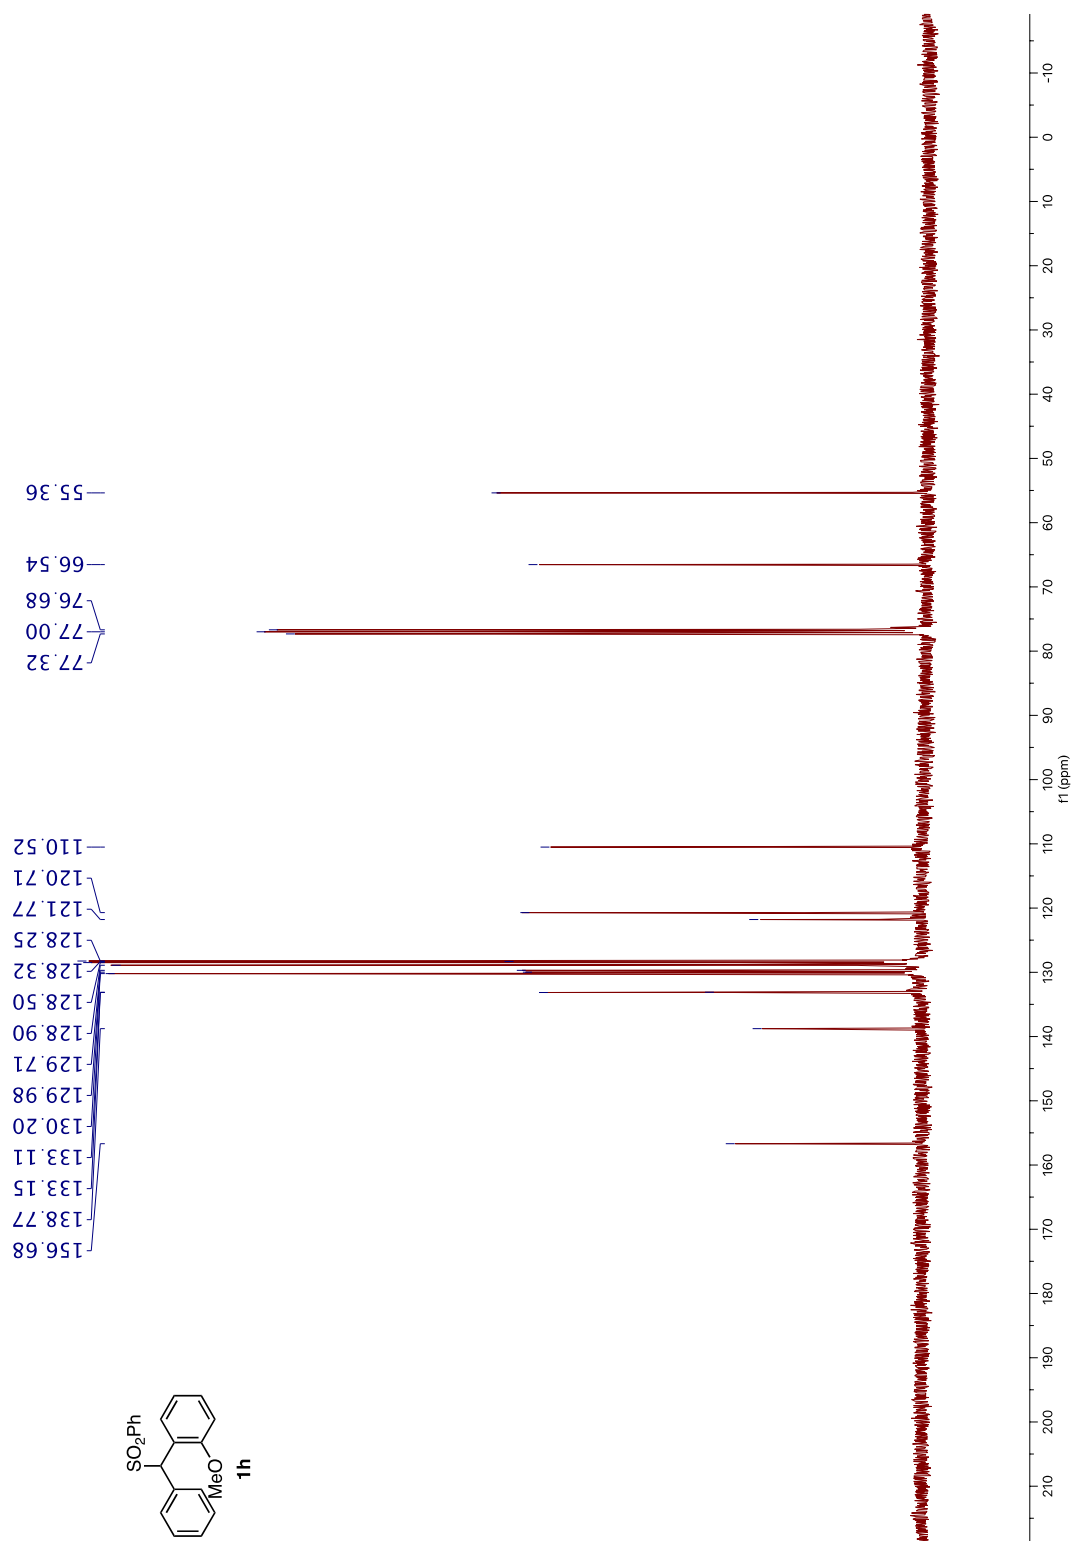



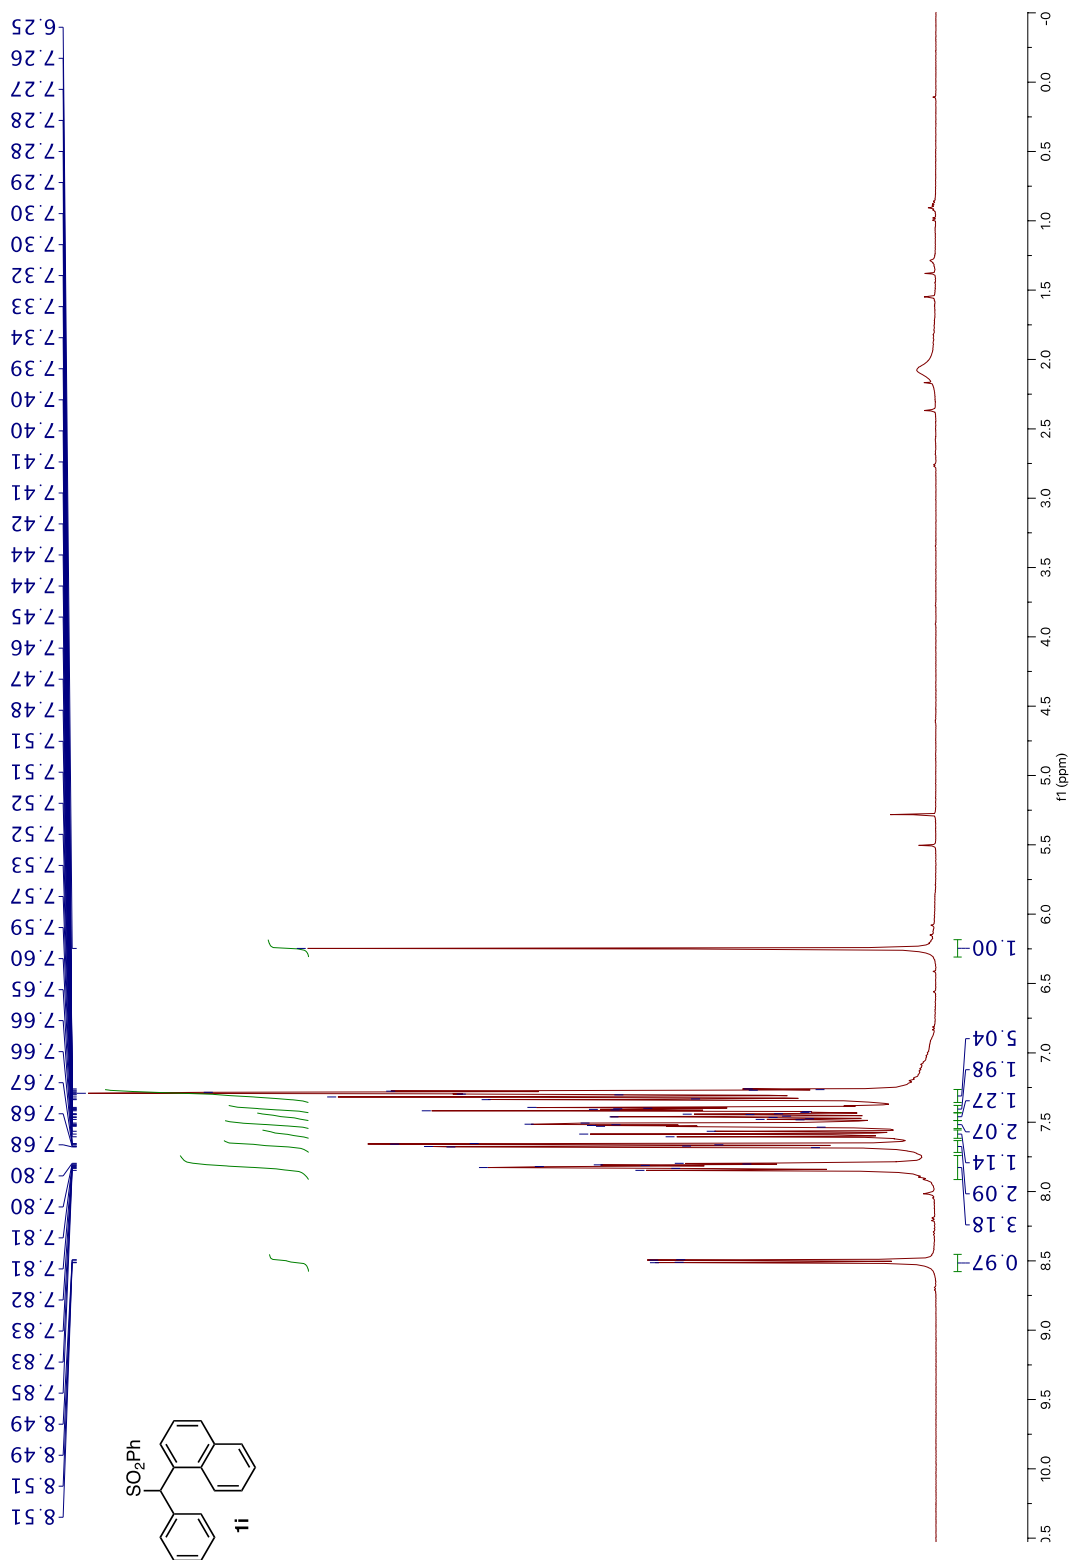

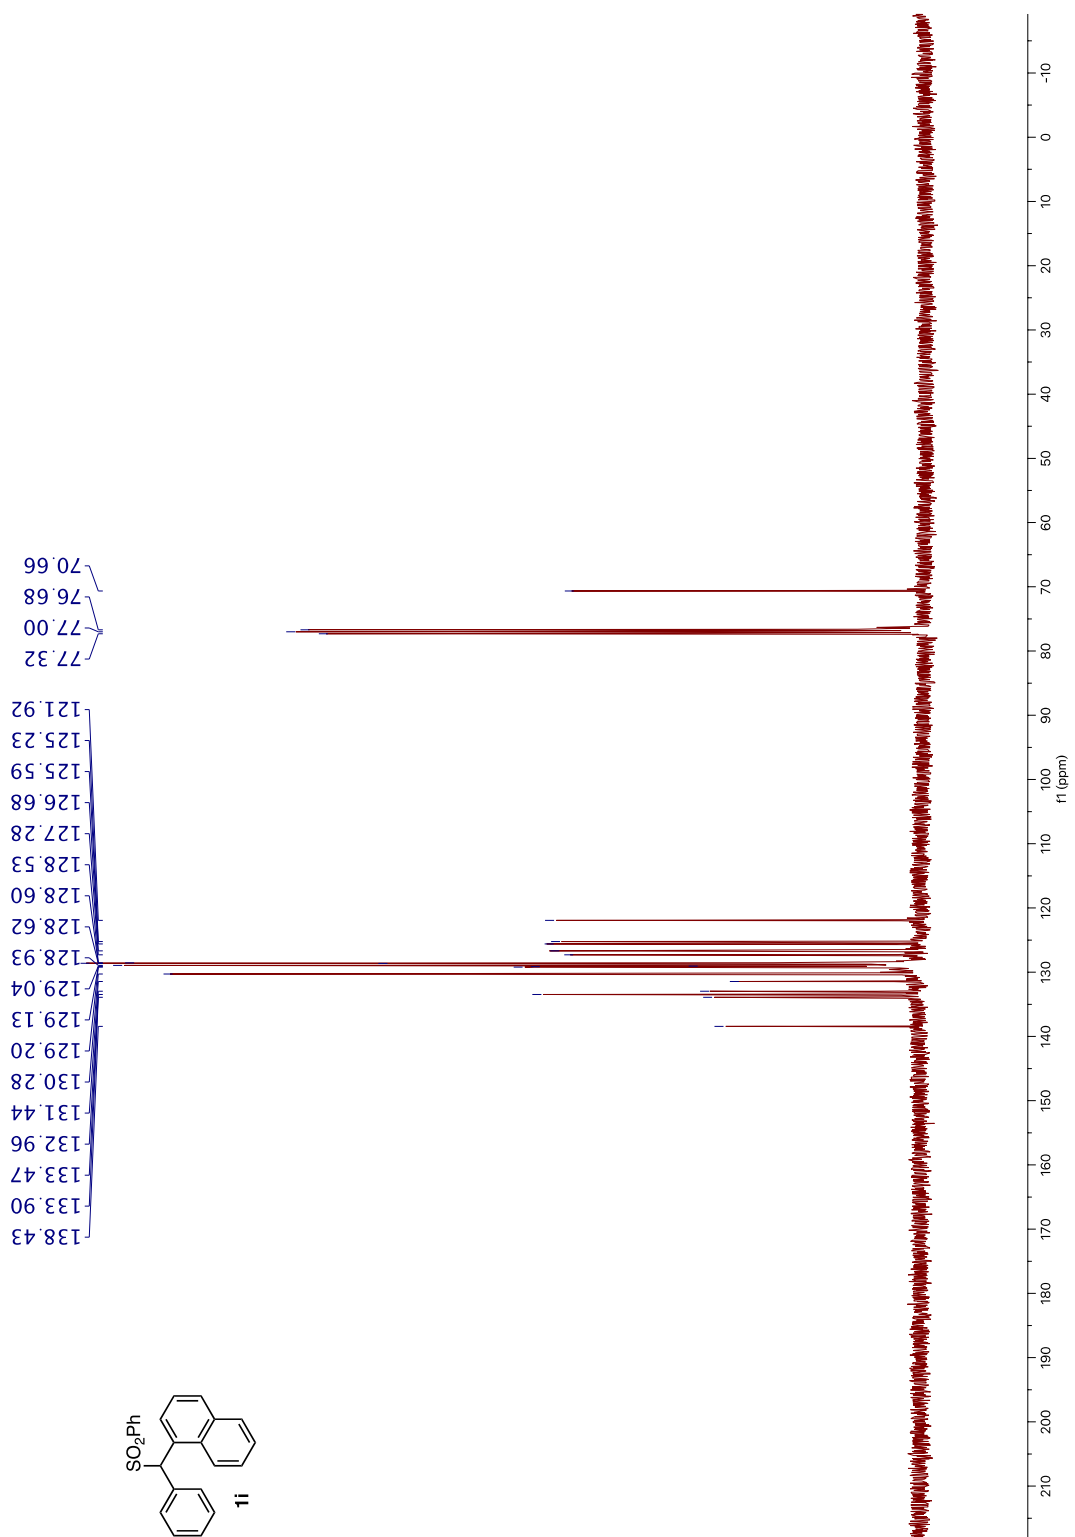

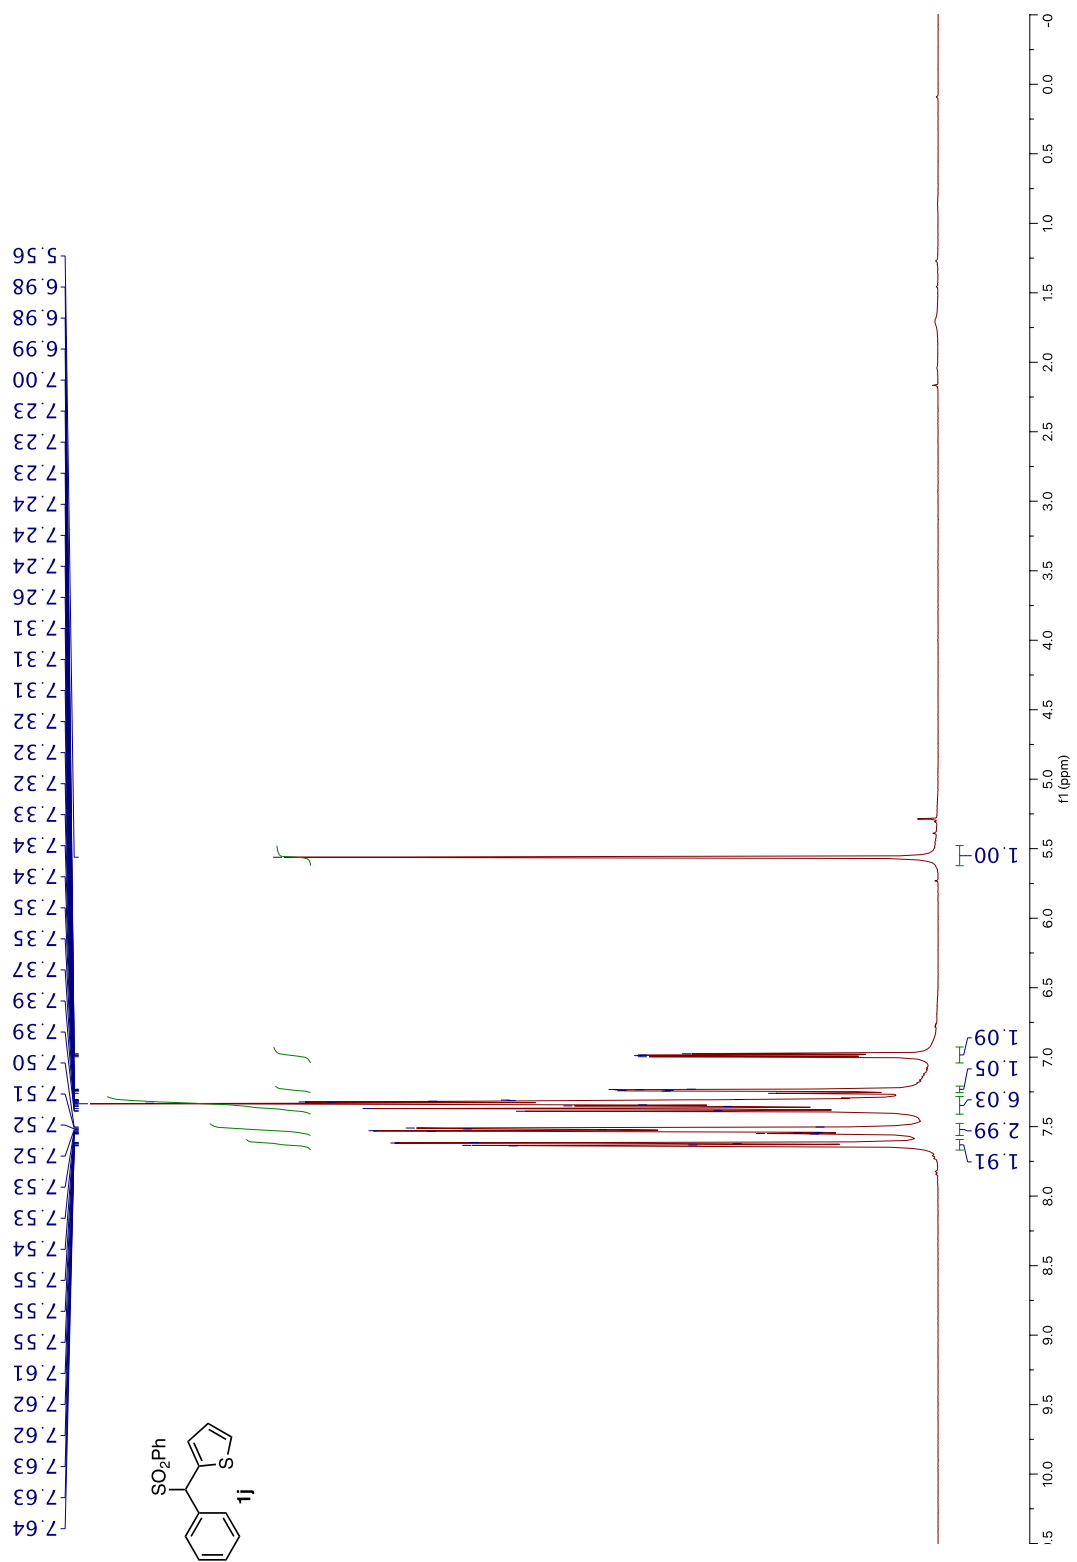

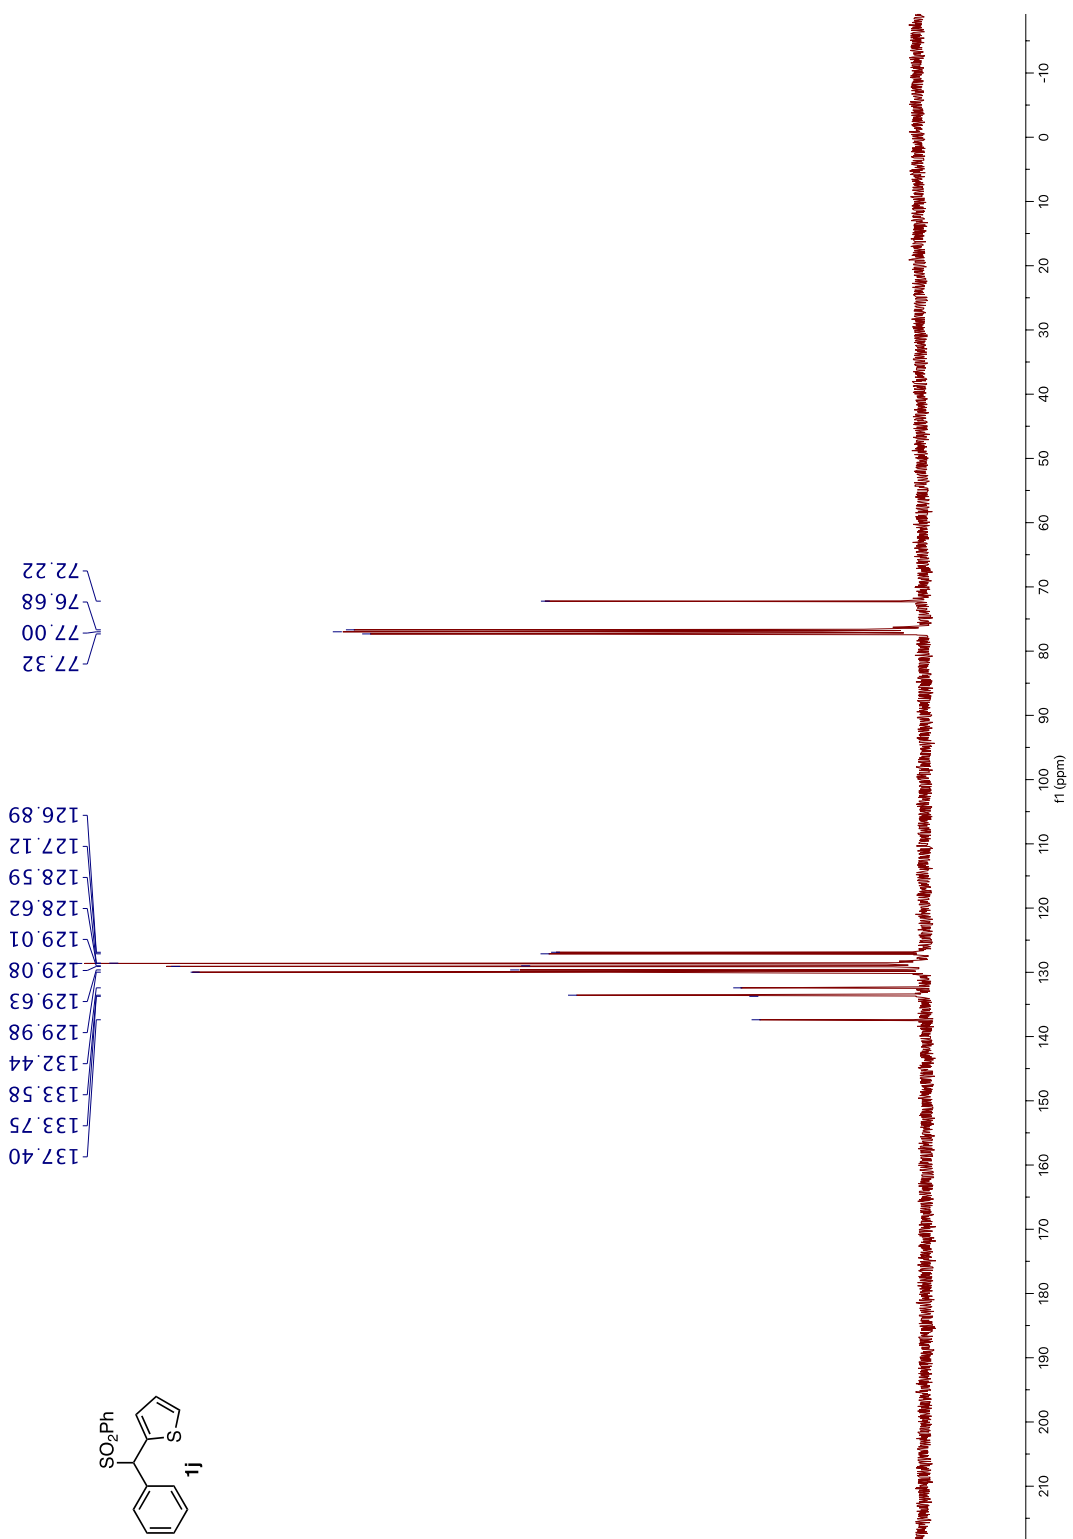

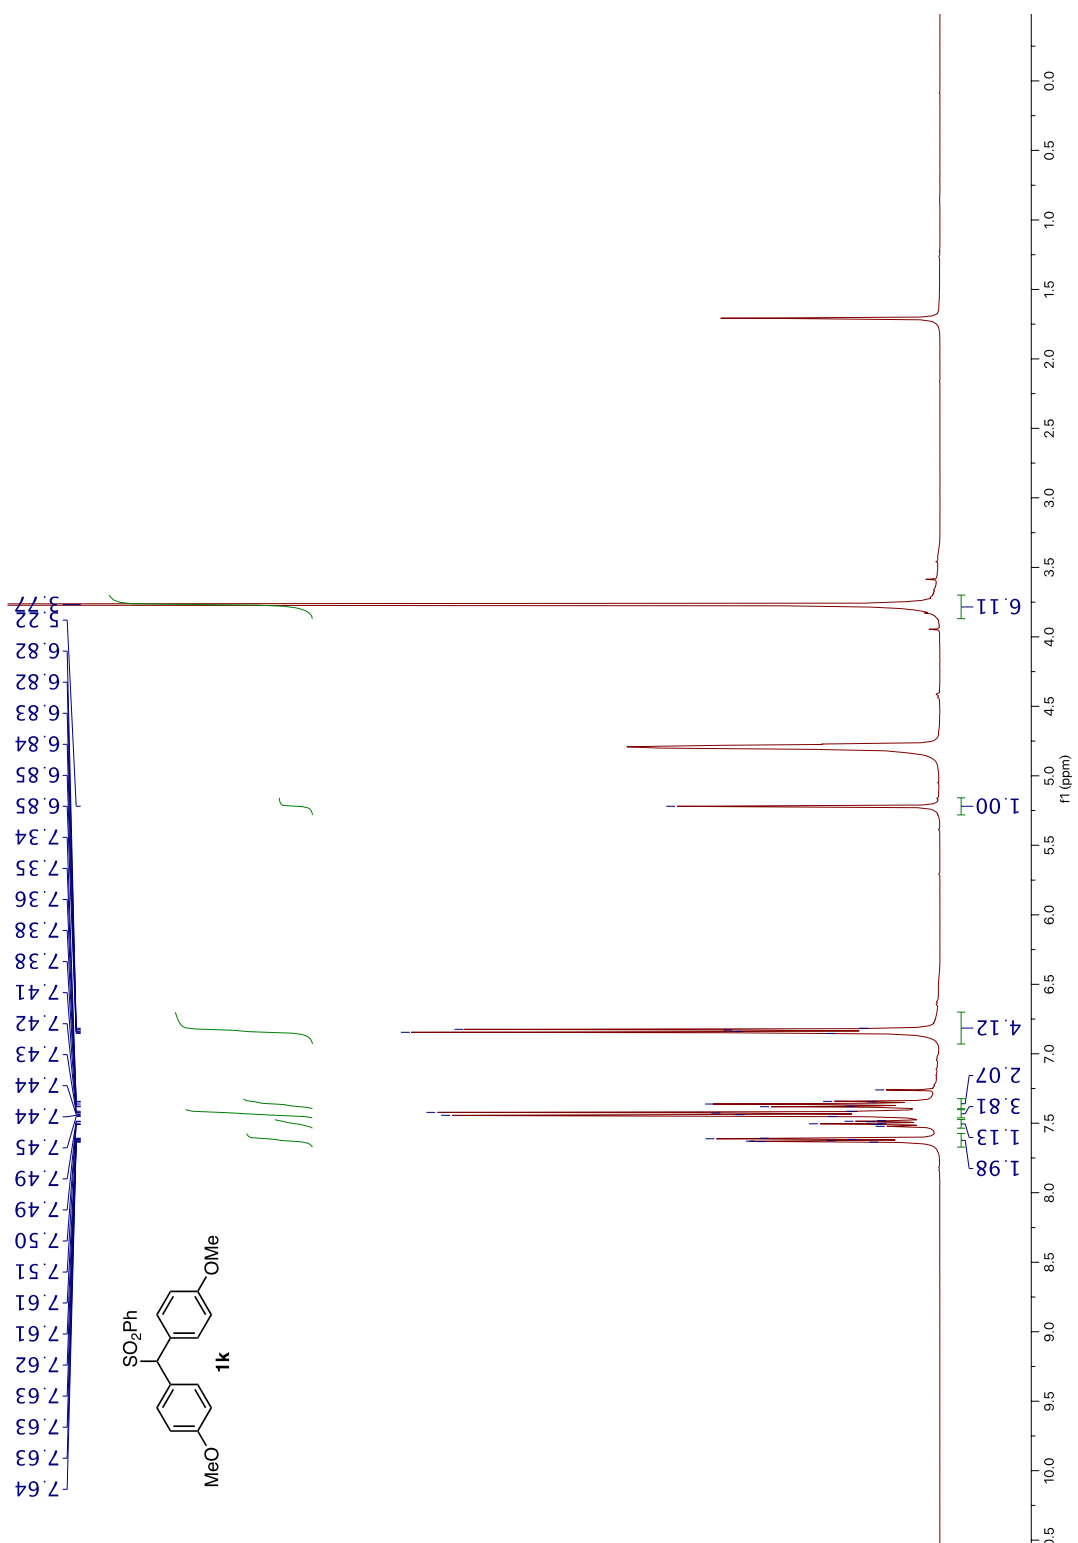

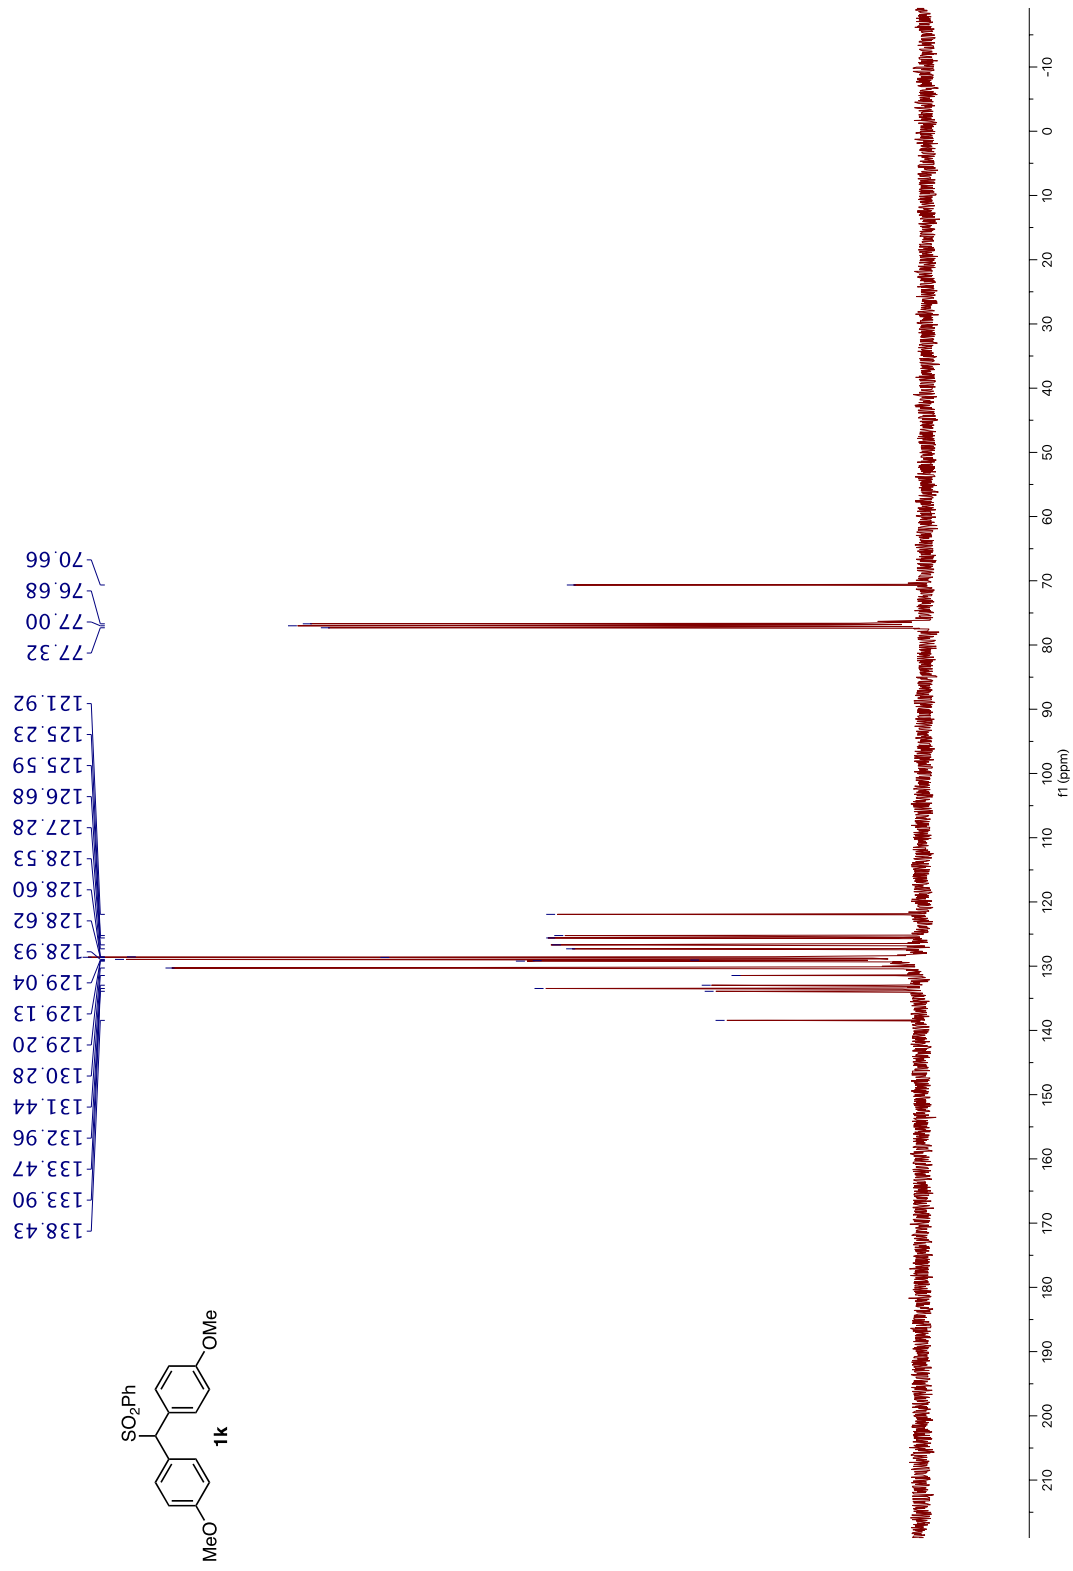

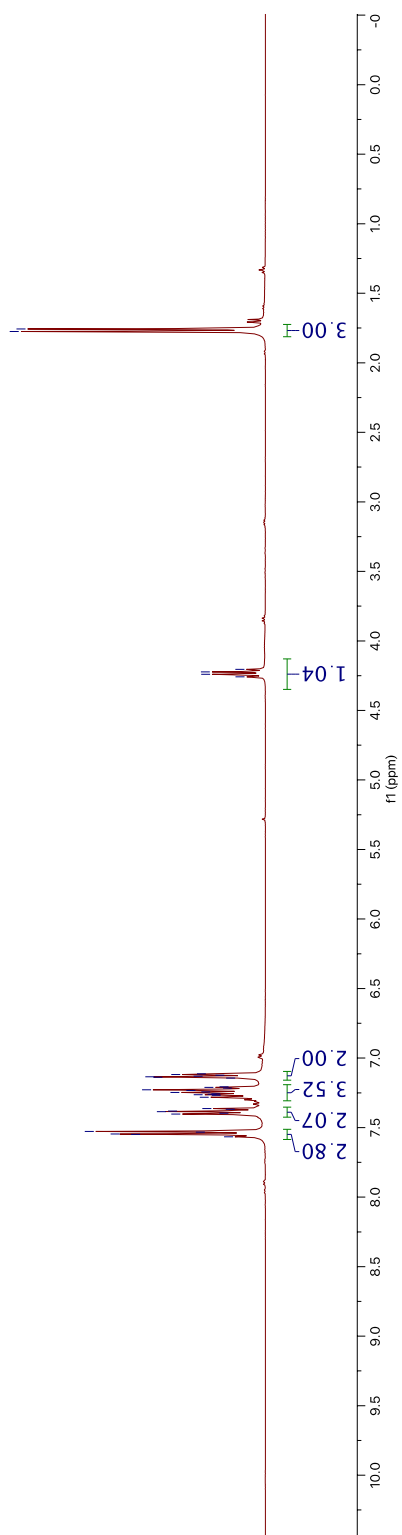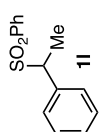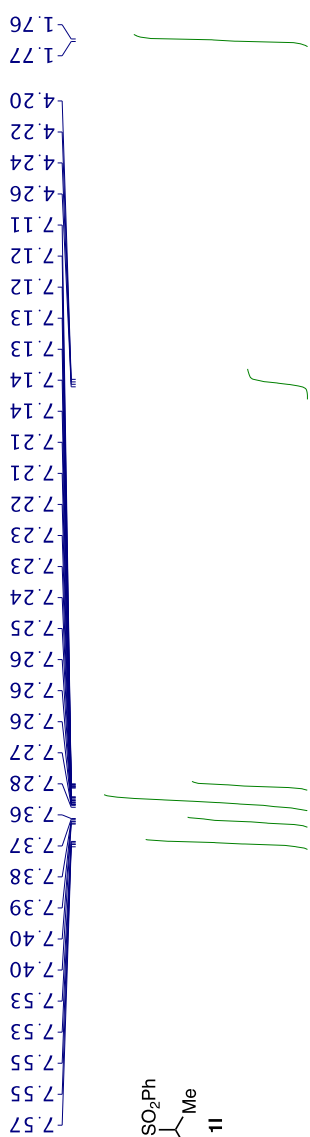

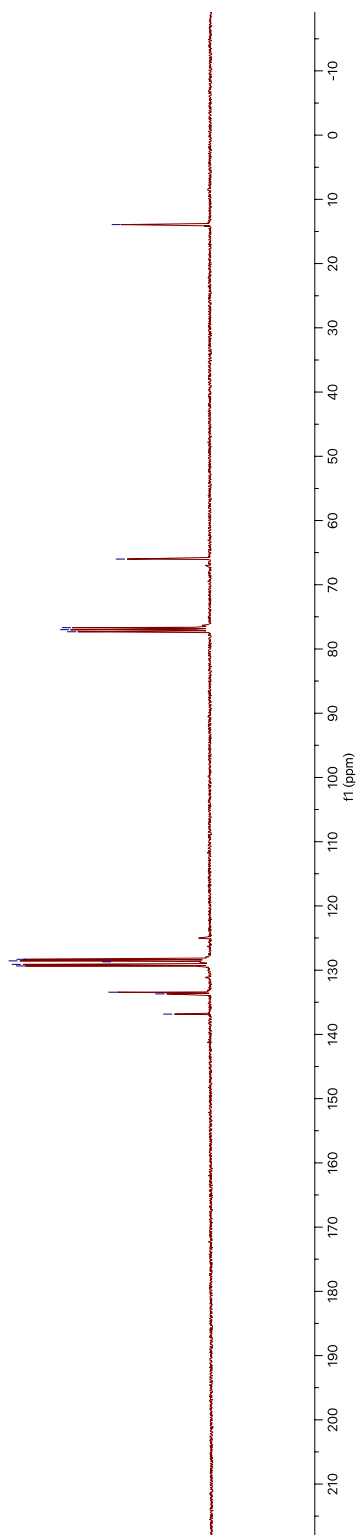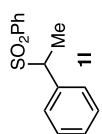

13.92

77.32  
77.00  
76.68  
66.00

128.30  
128.55  
128.70  
129.10  
129.33  
133.43  
133.70  
136.84



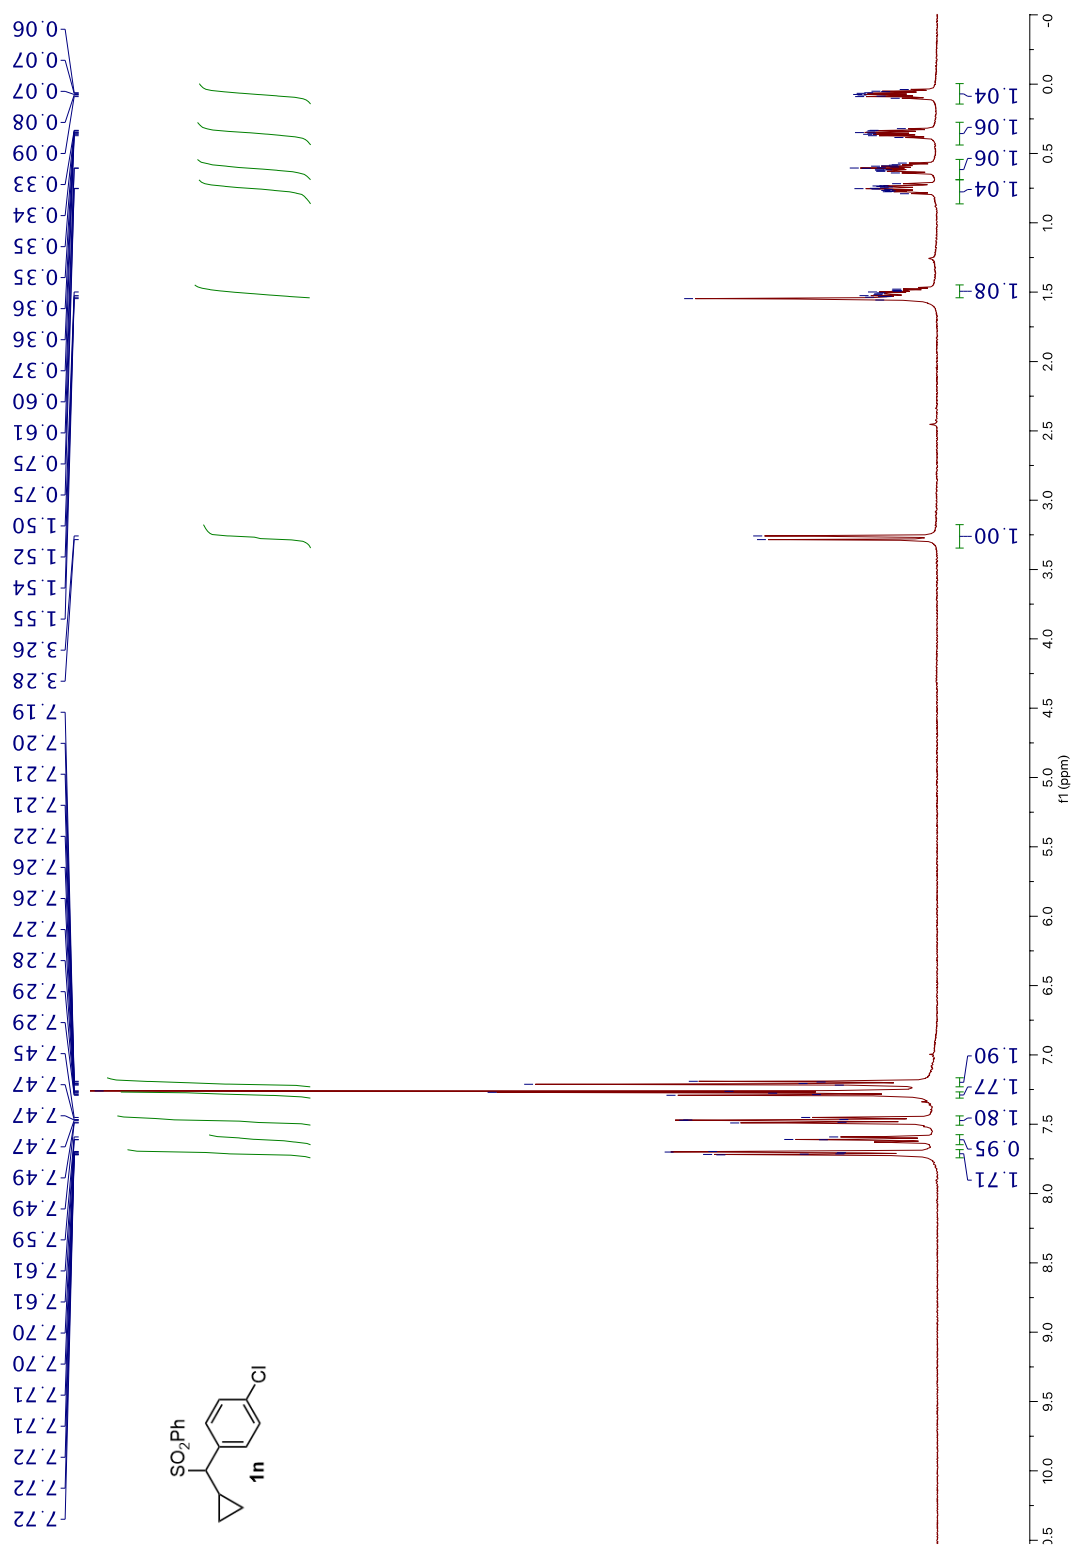

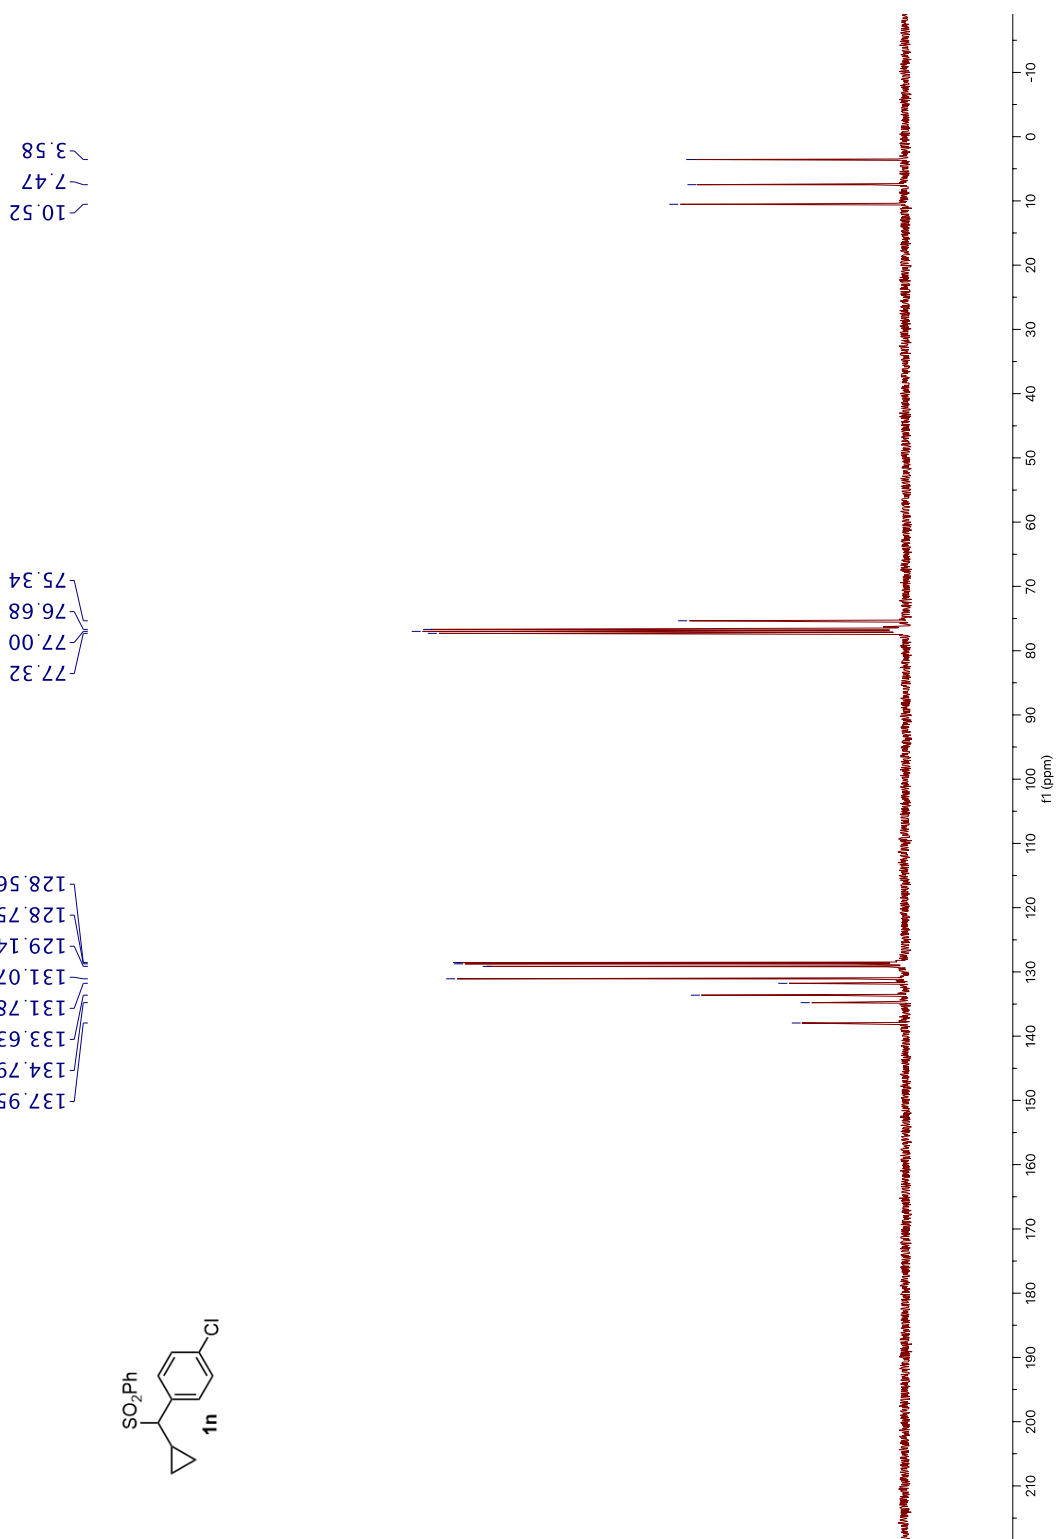

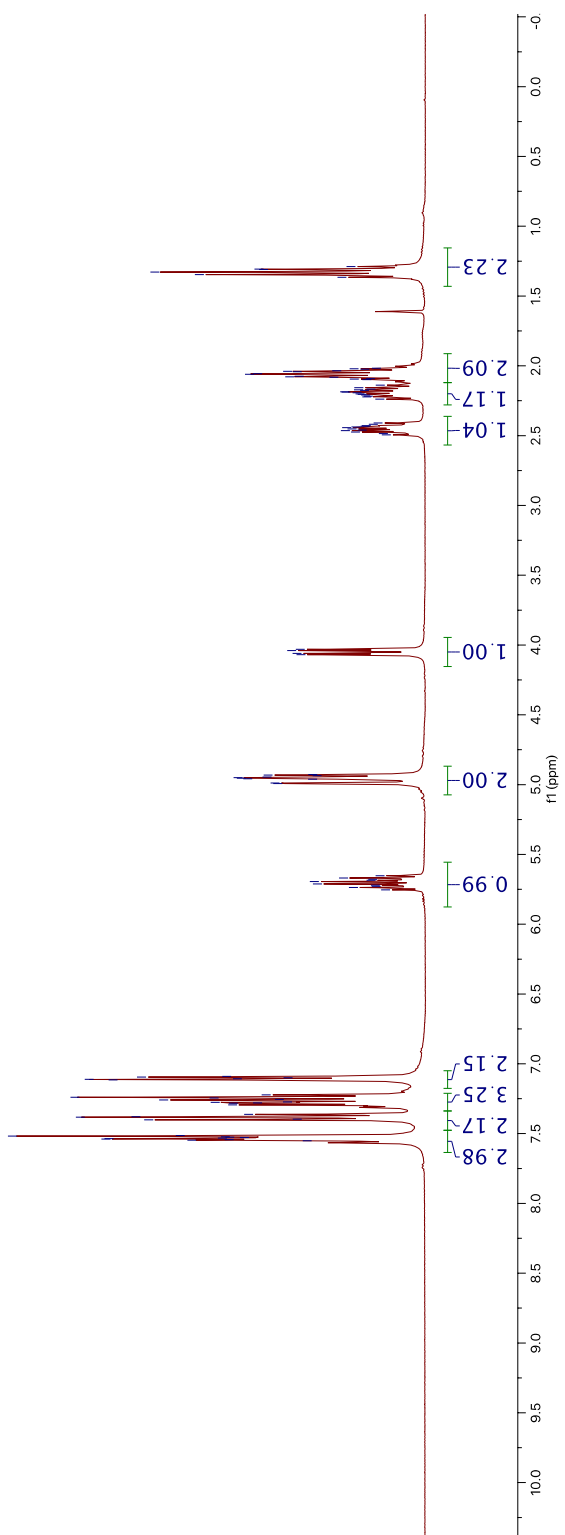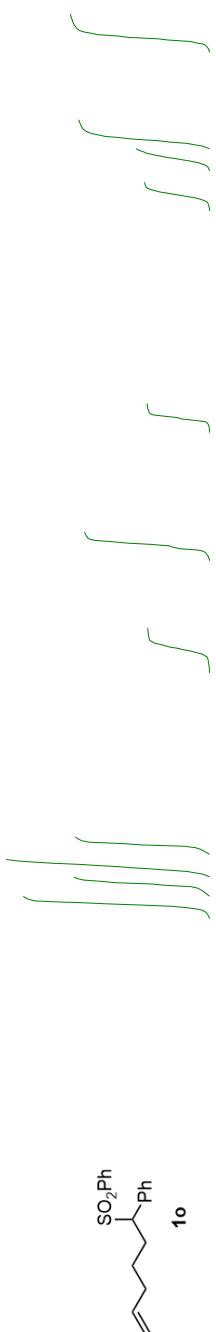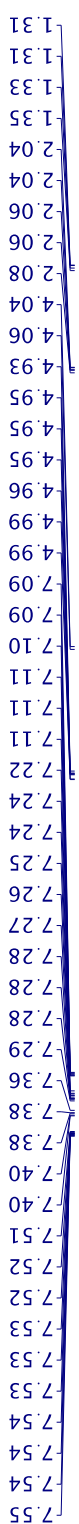

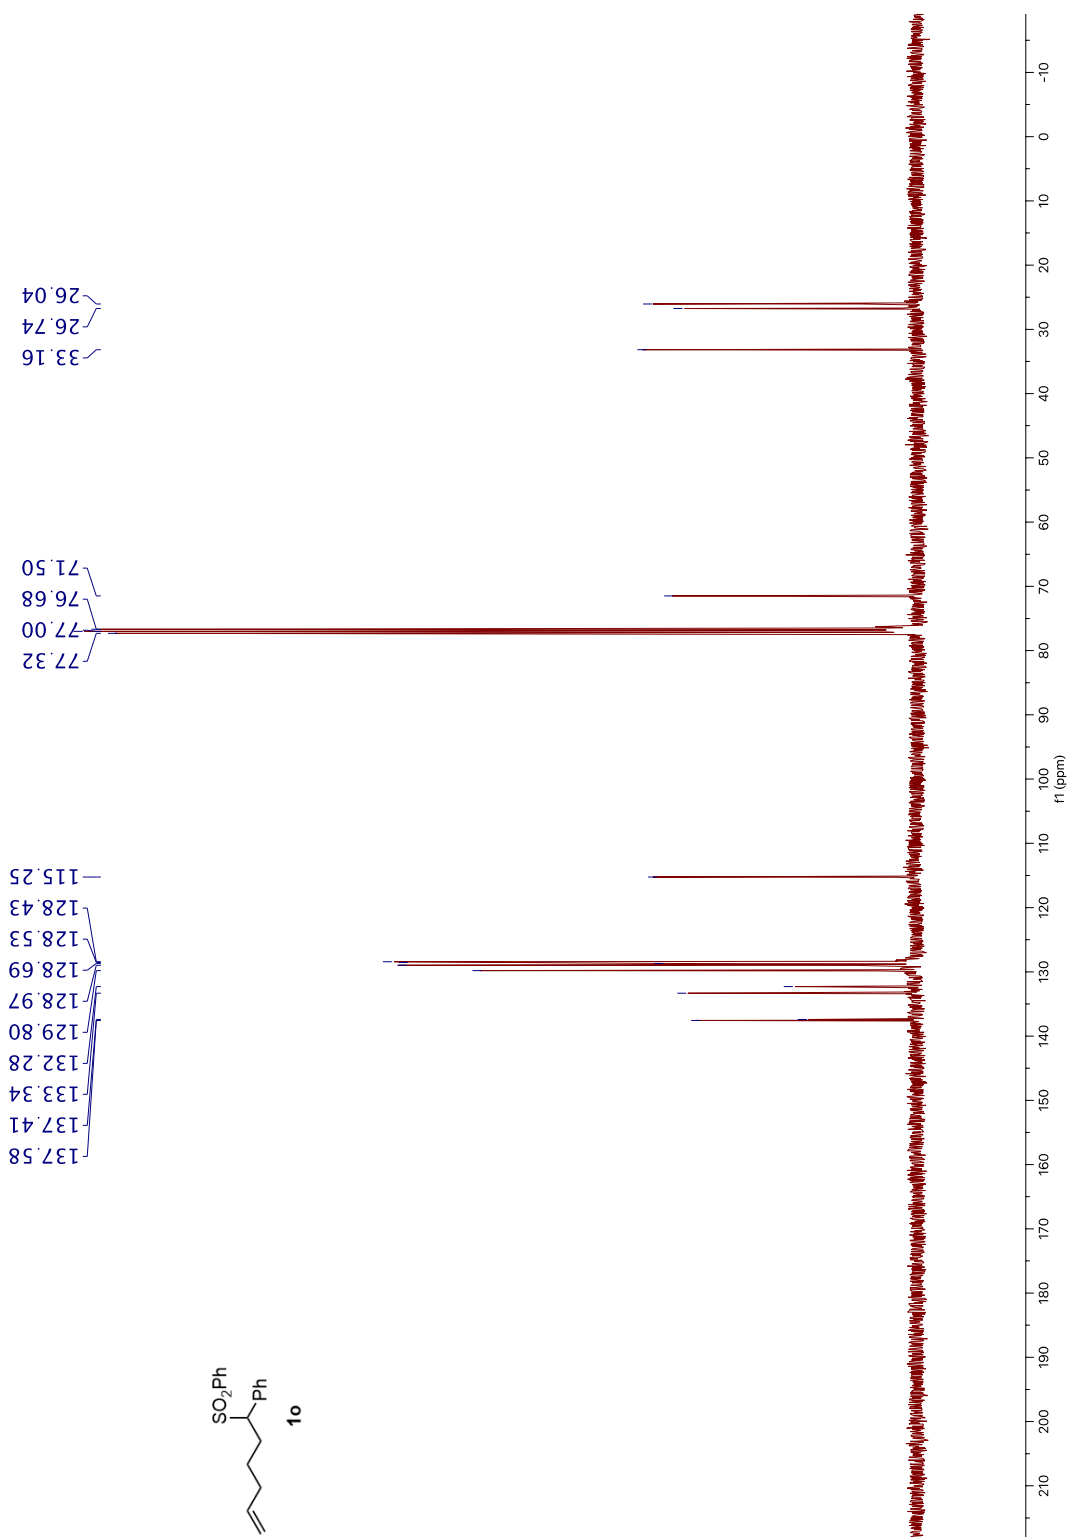

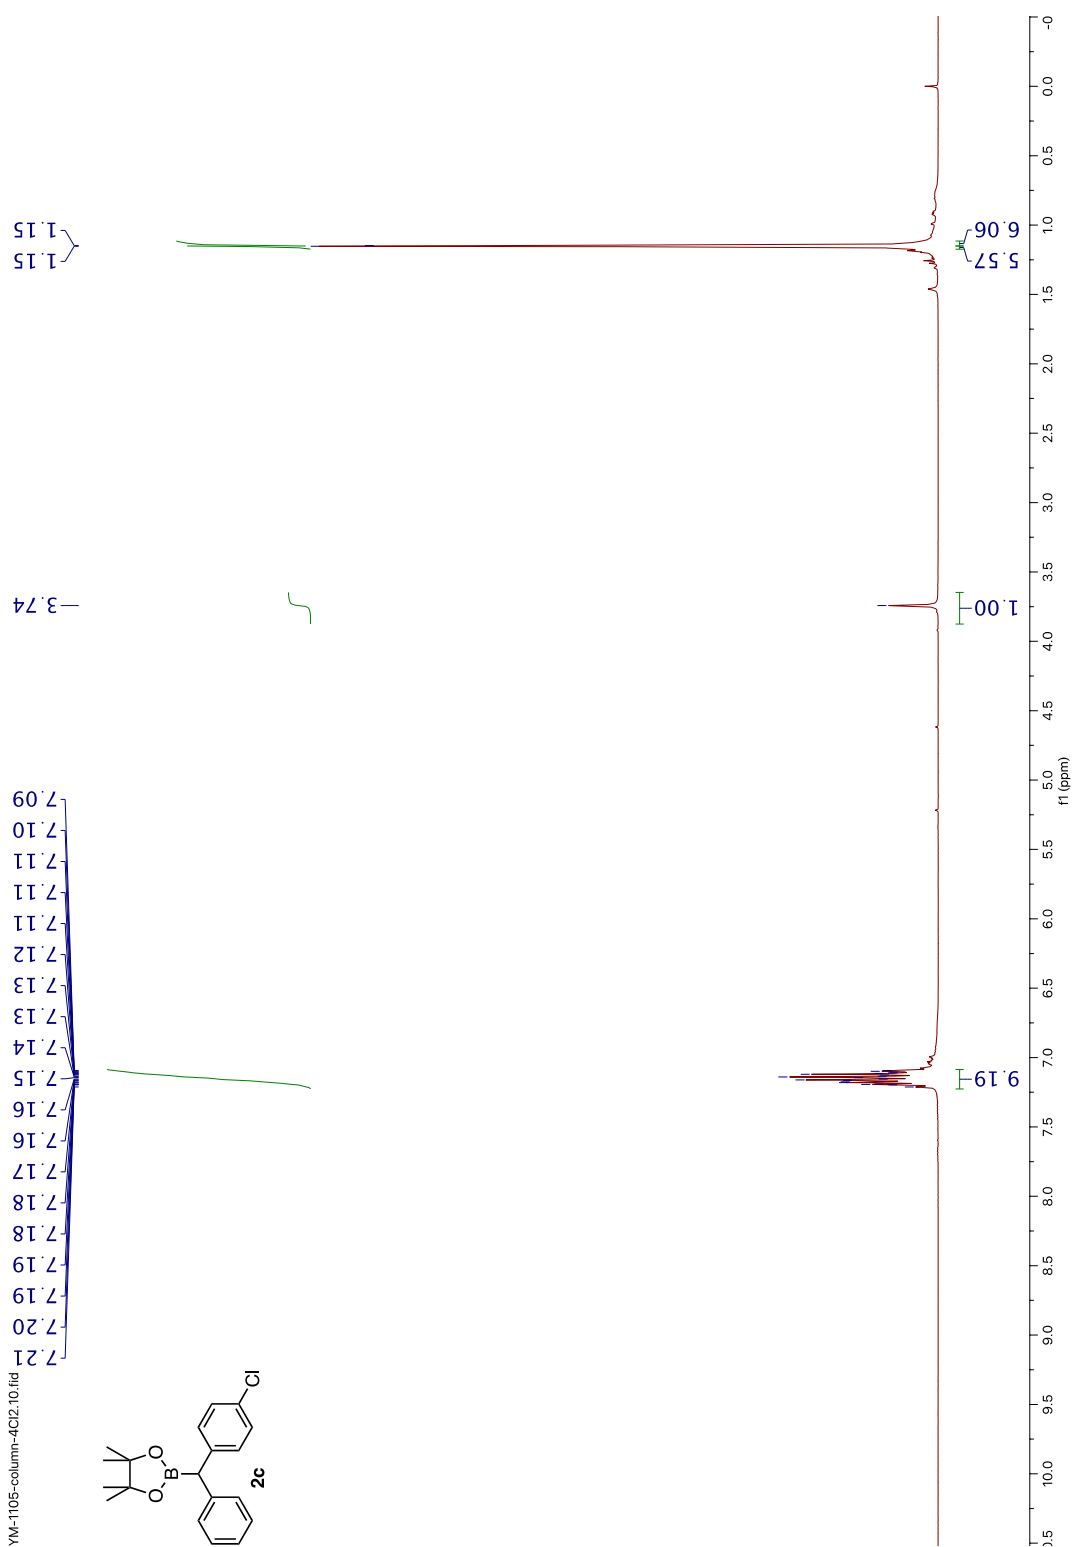

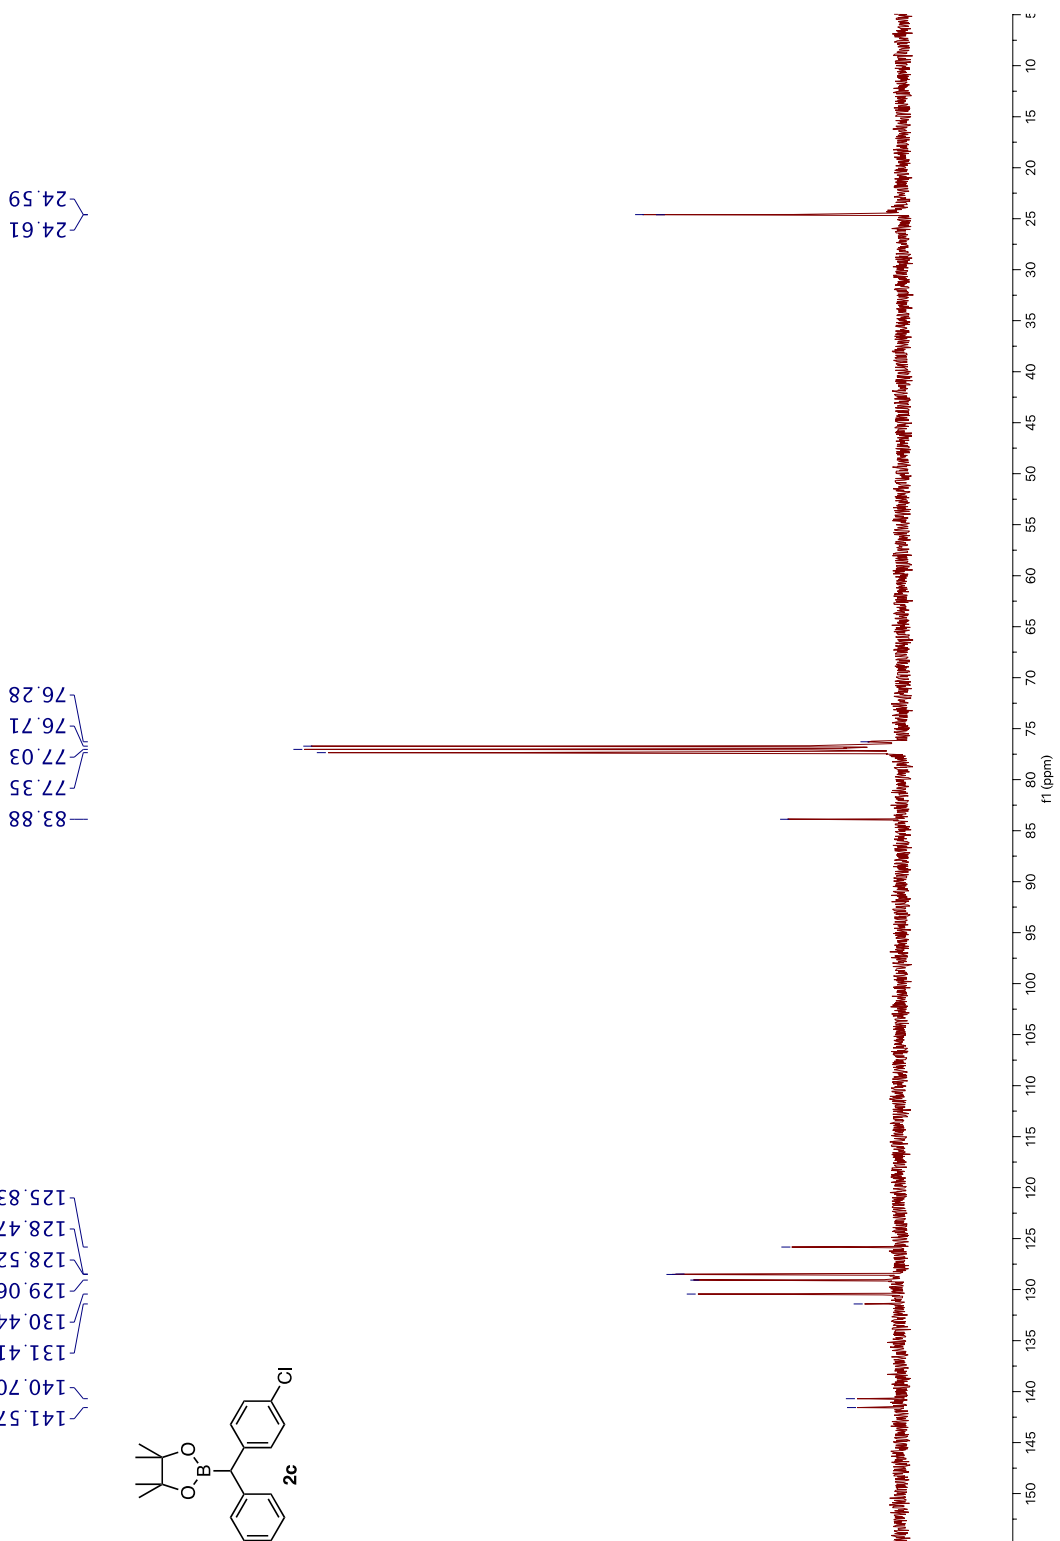

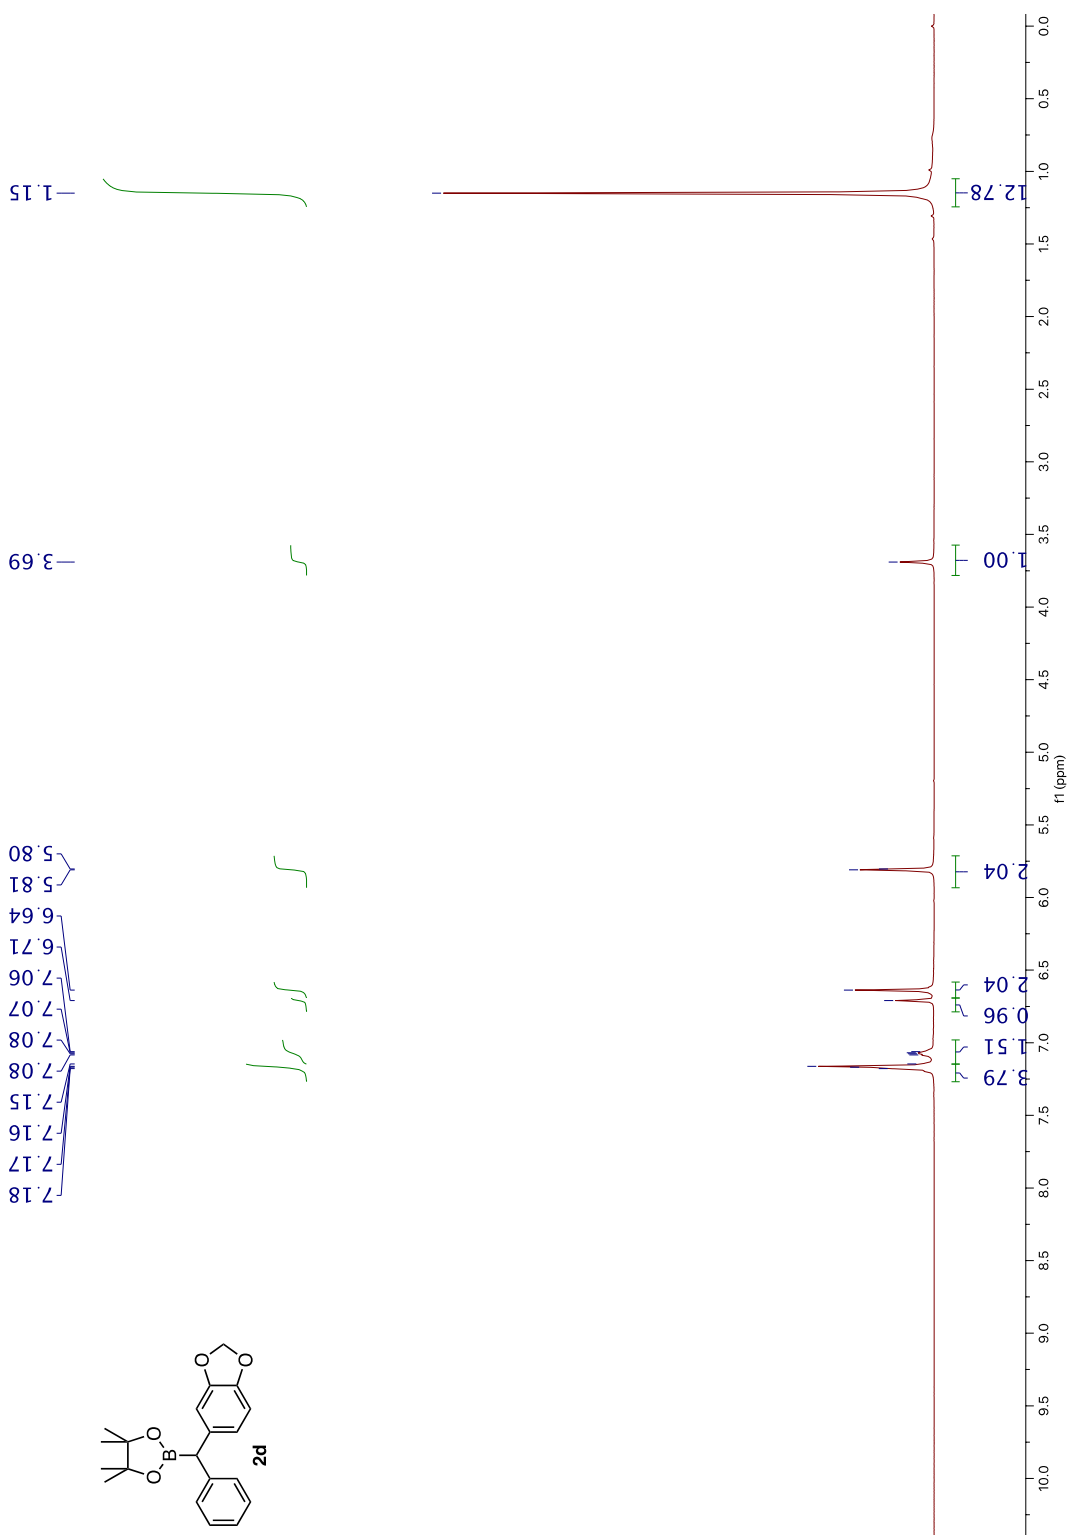

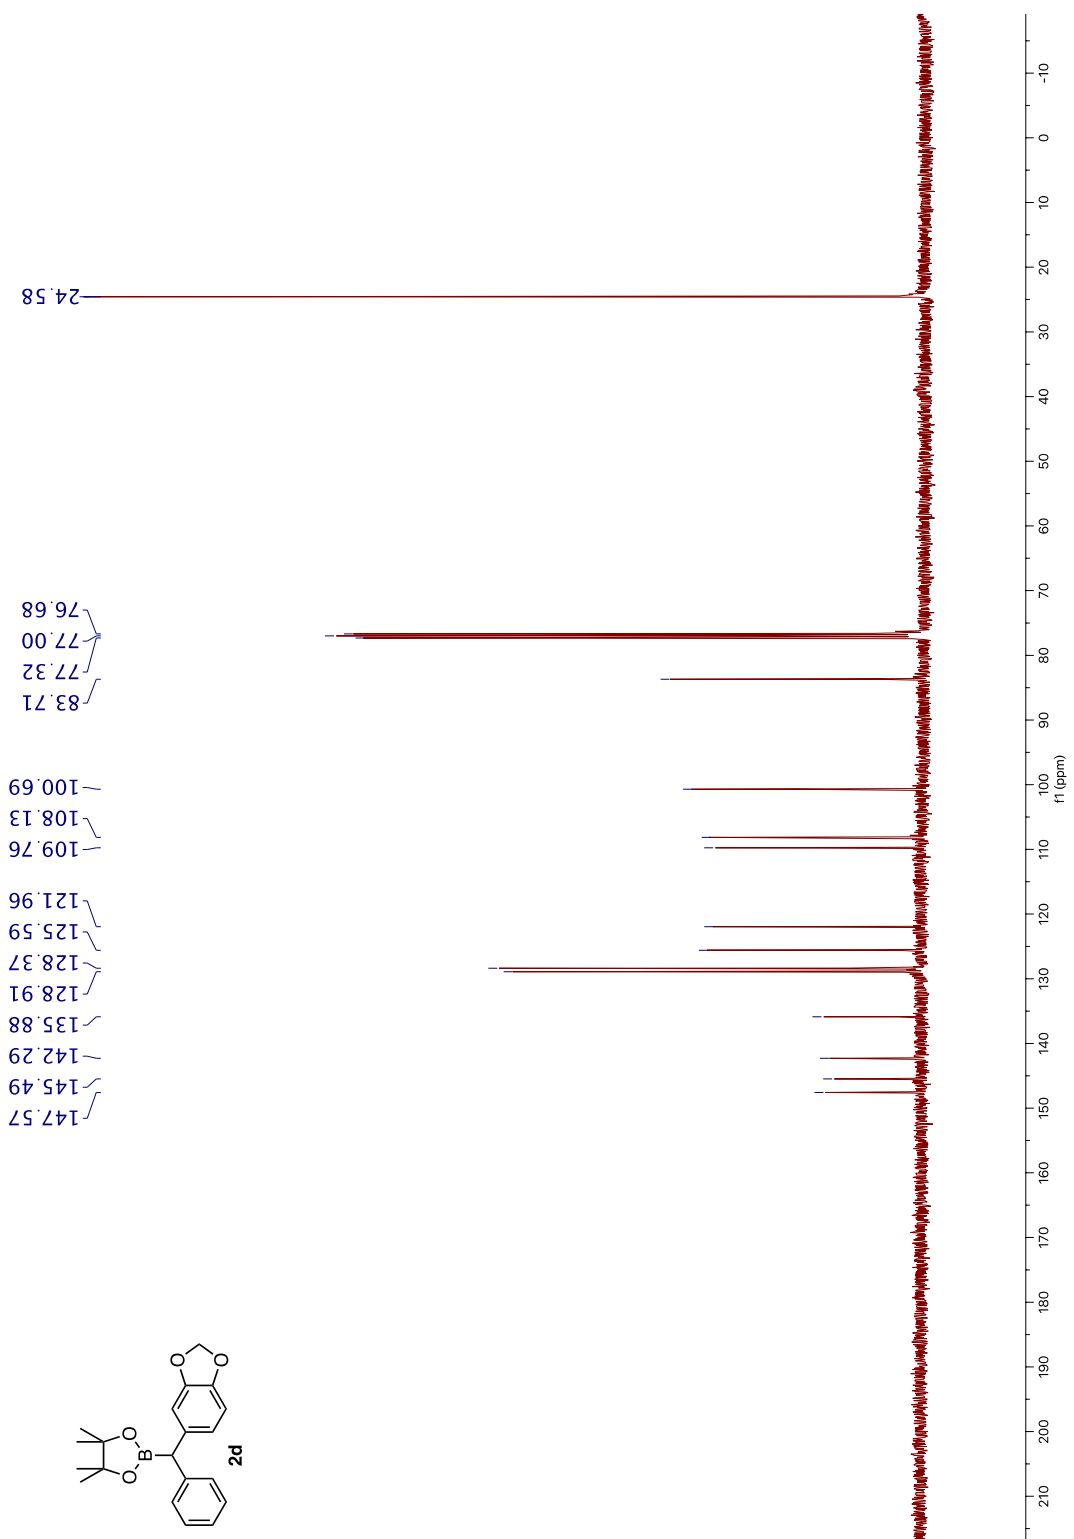



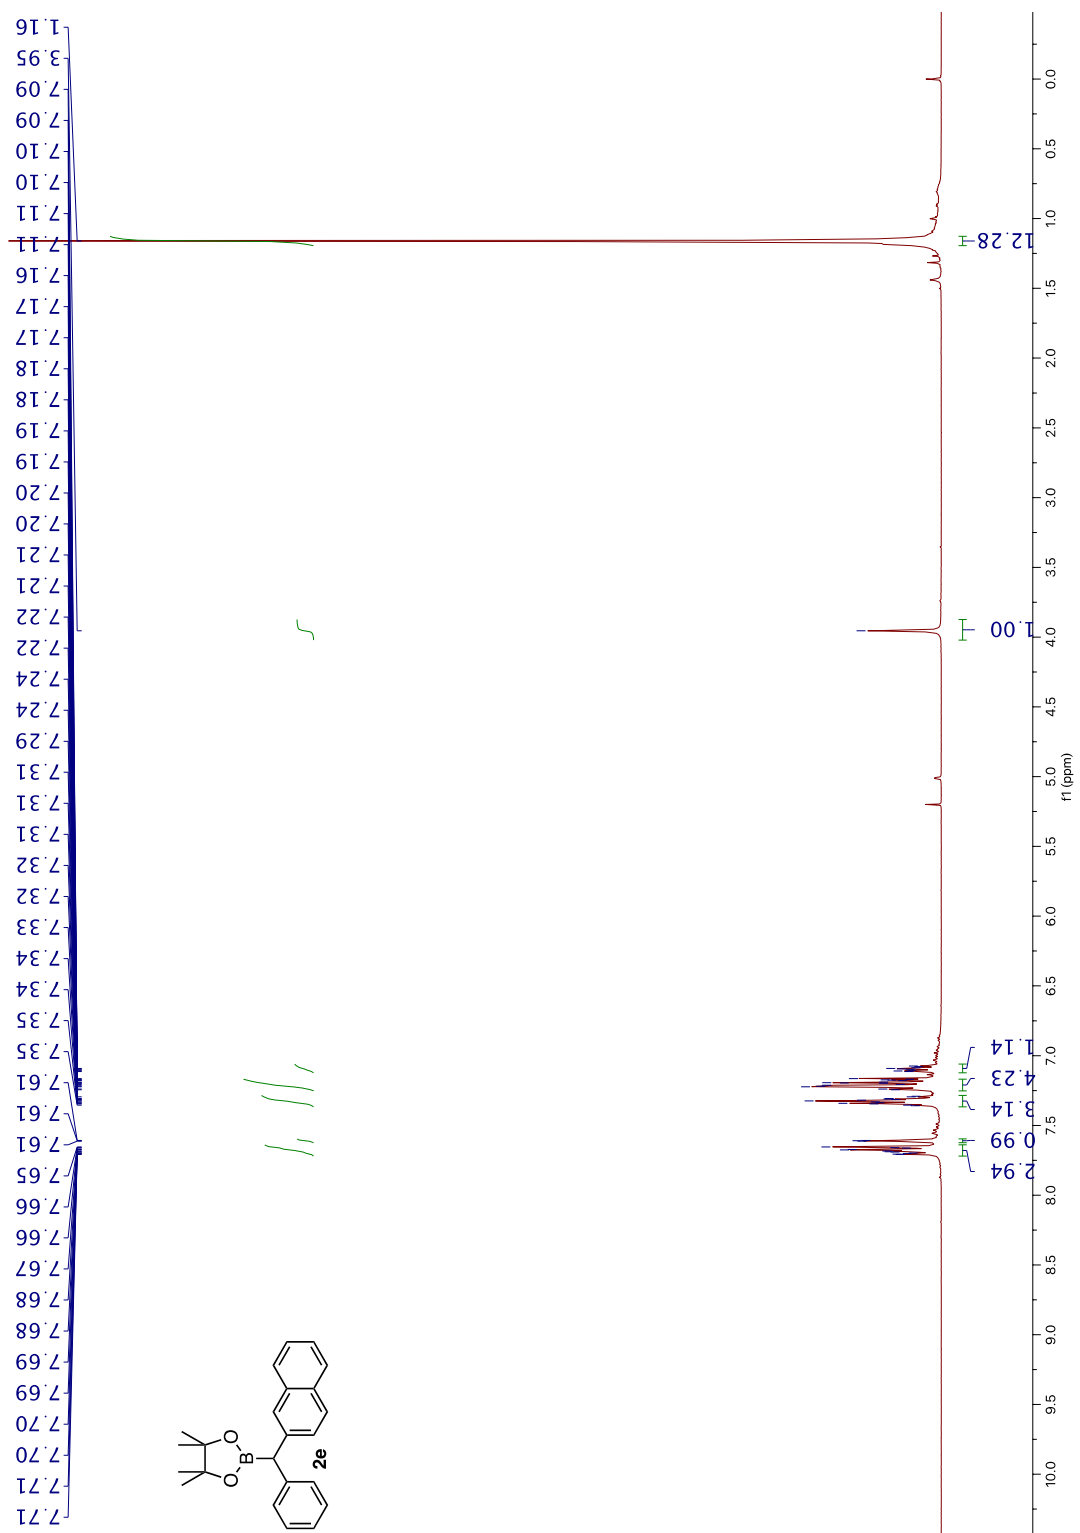

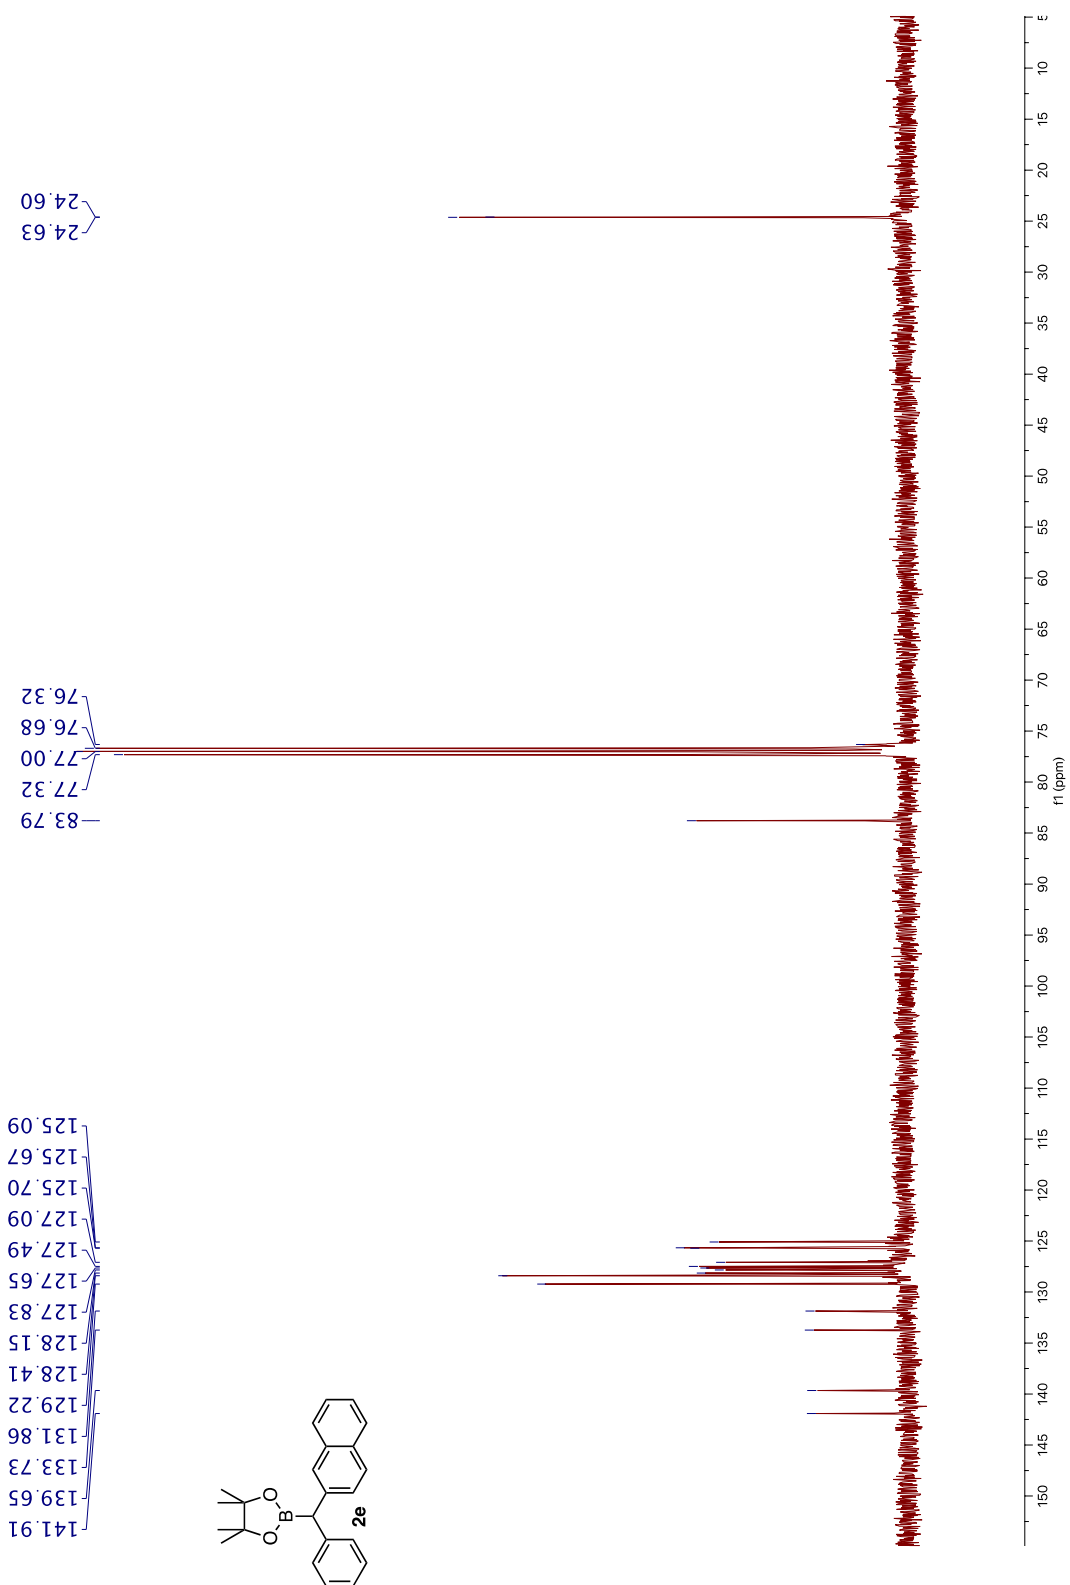

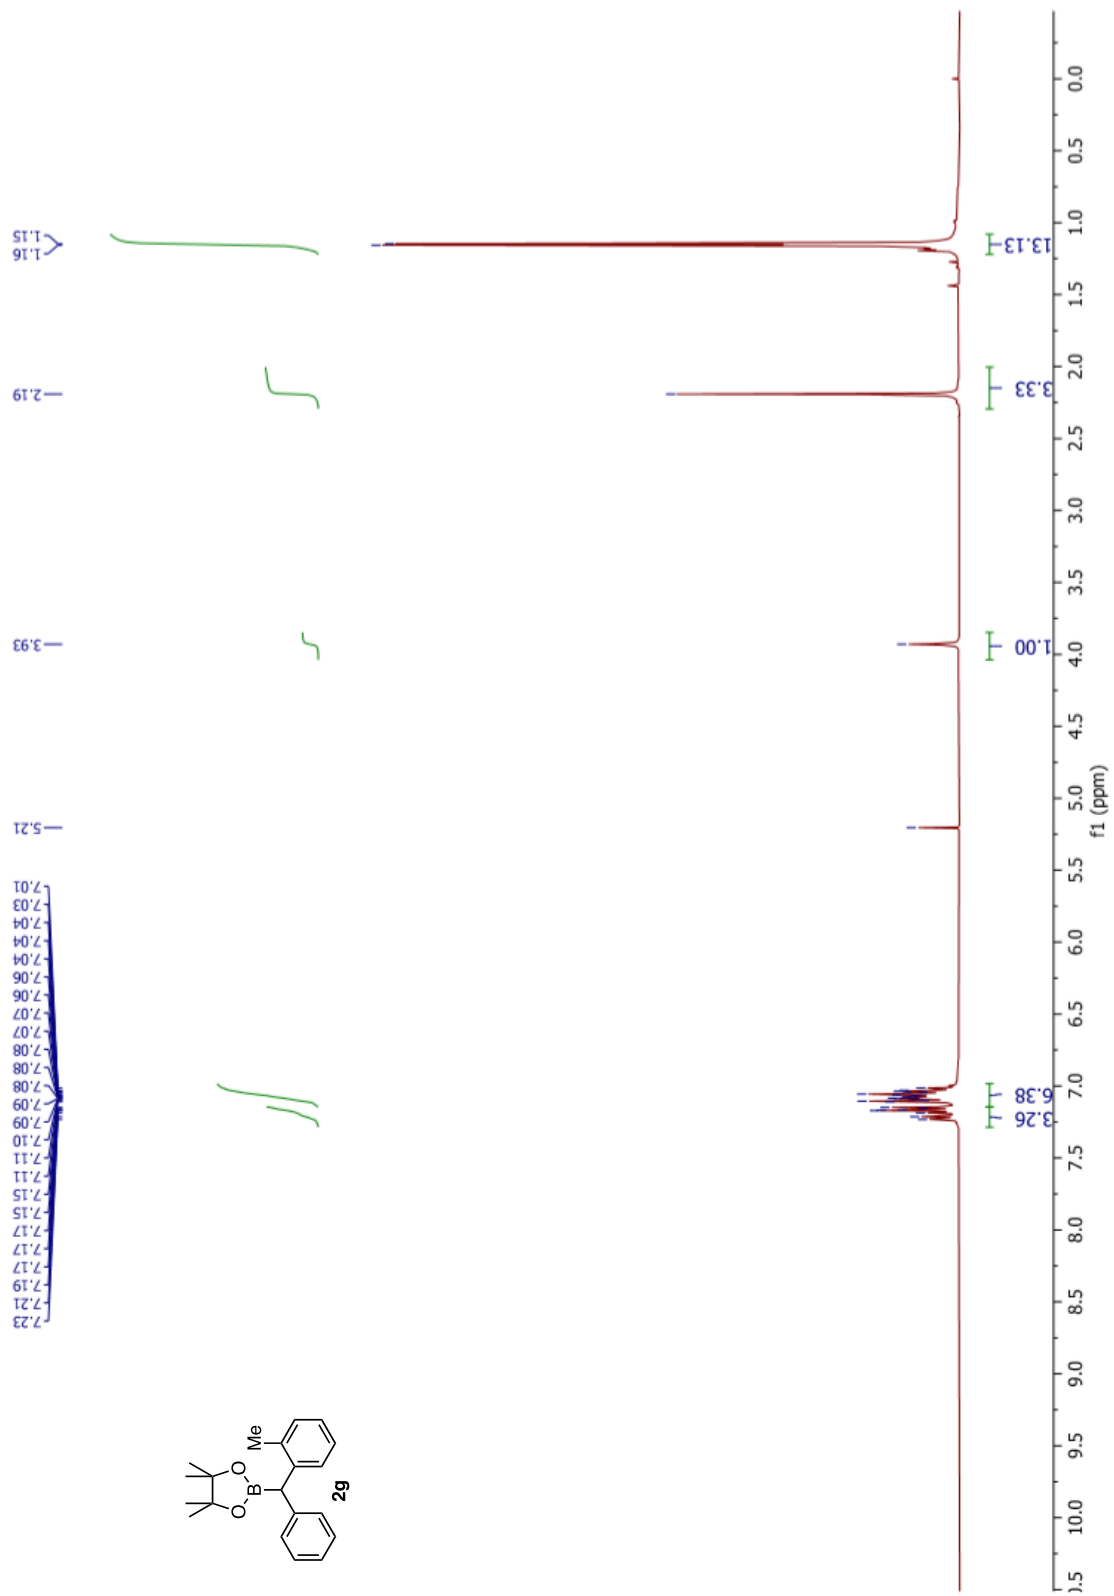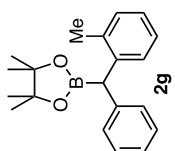

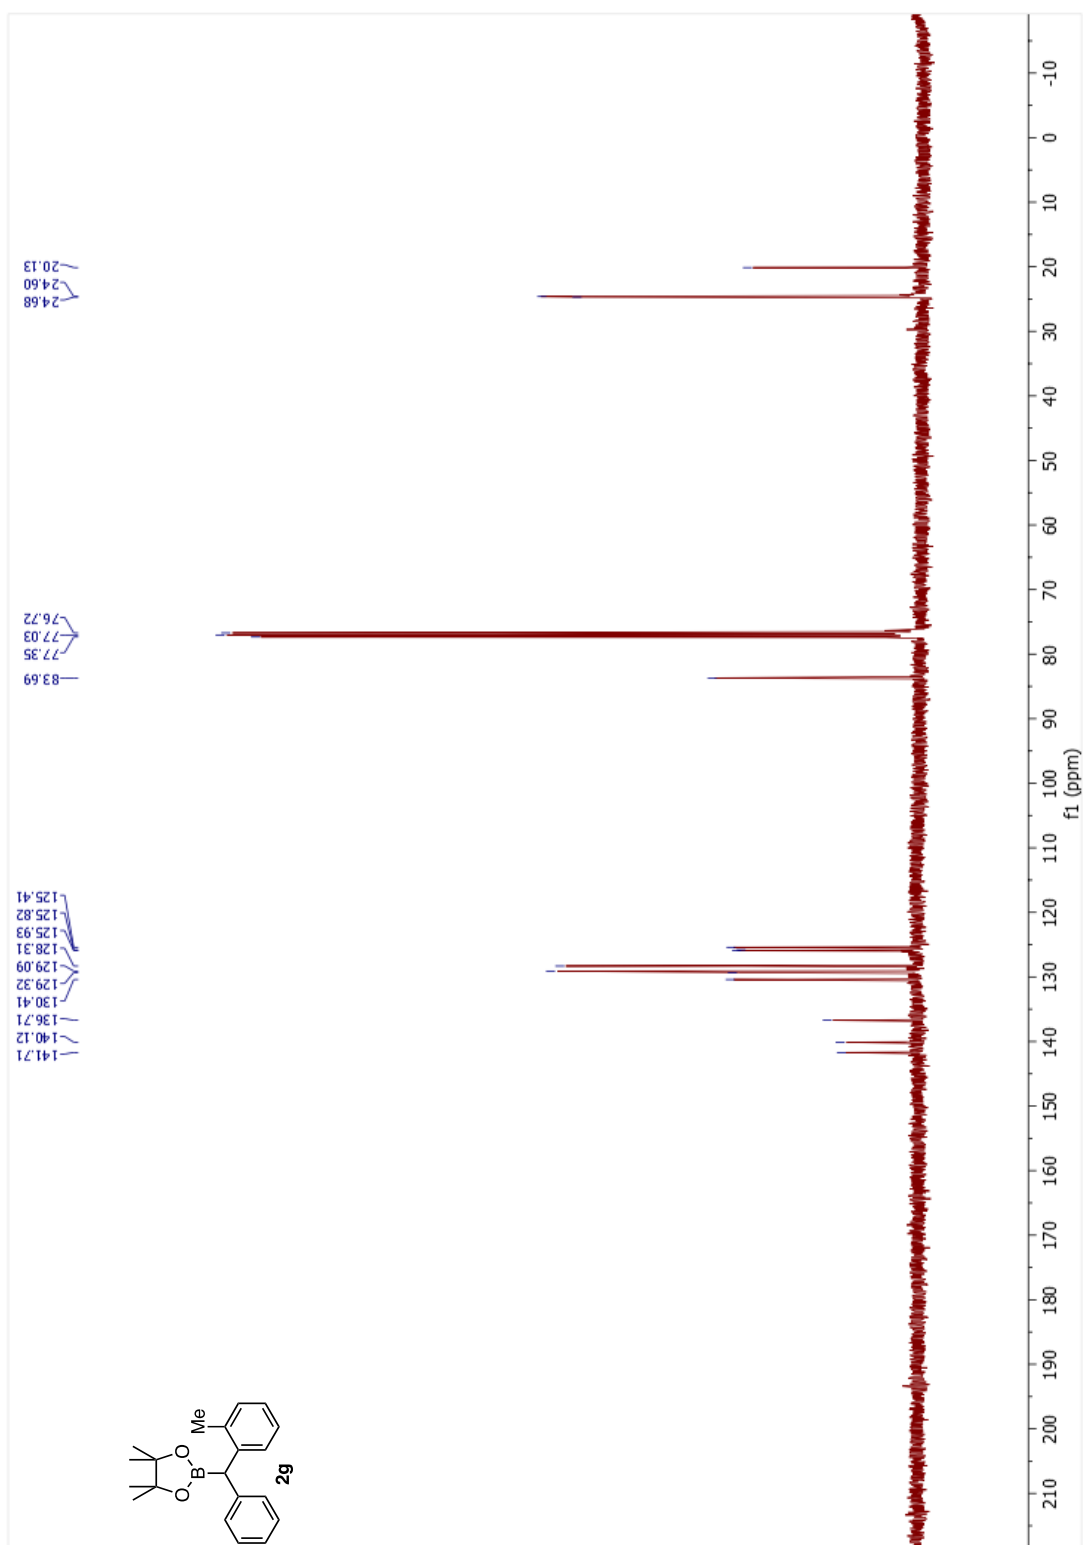

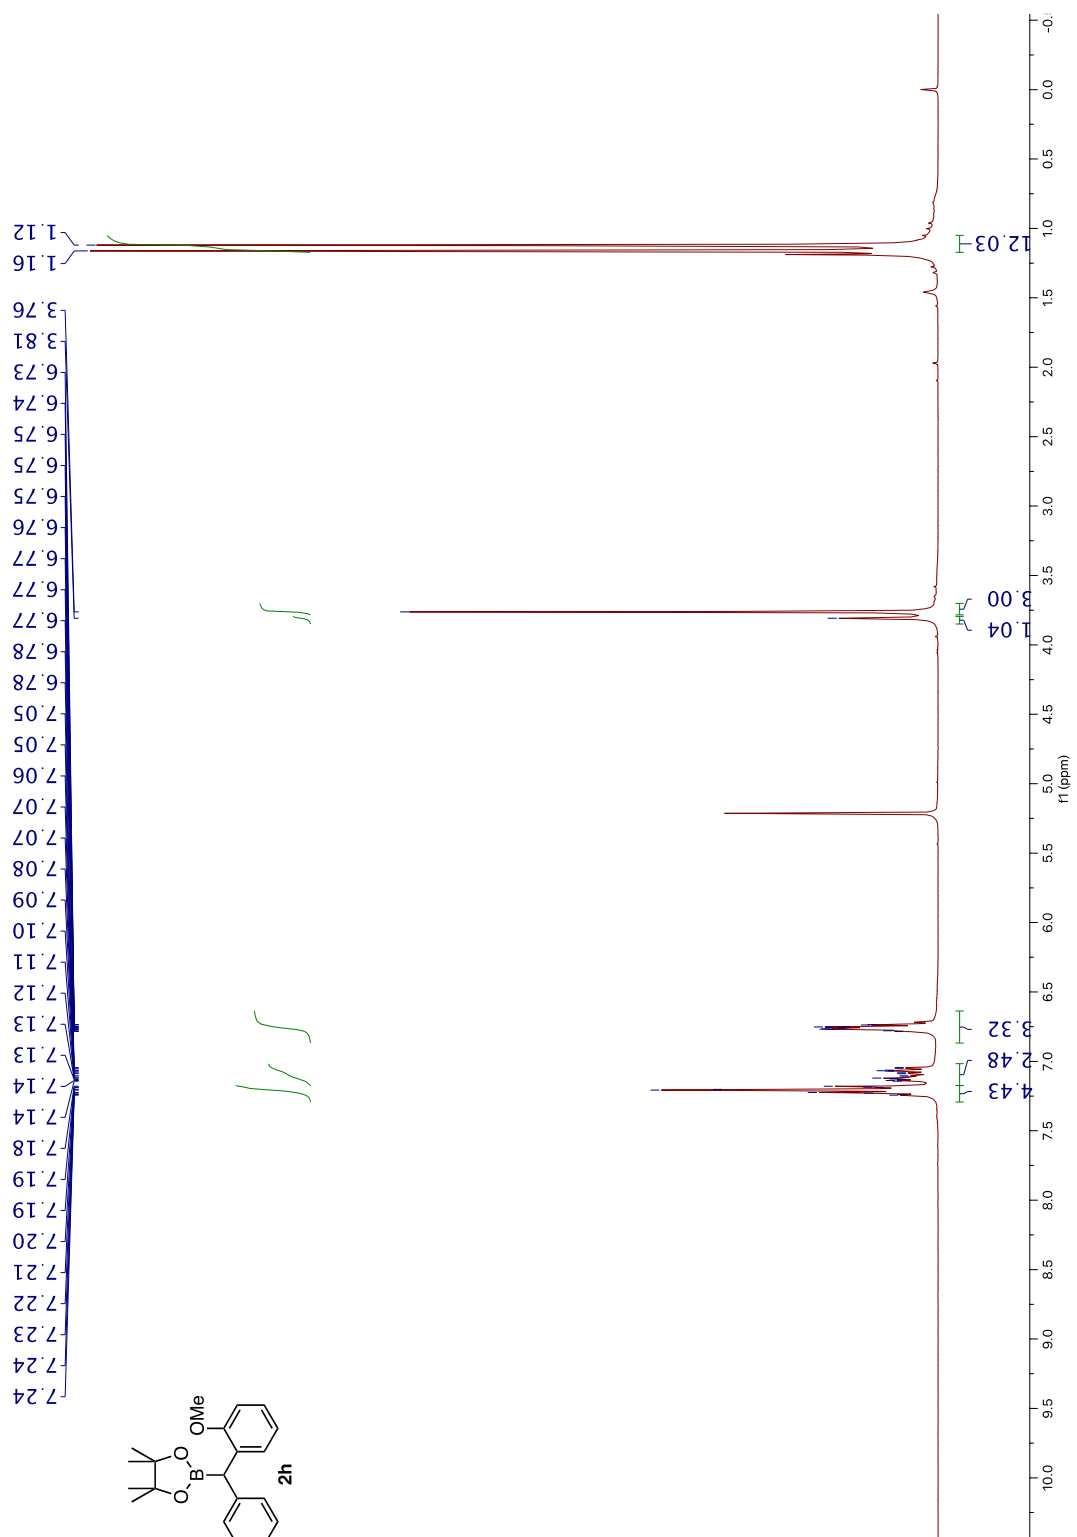

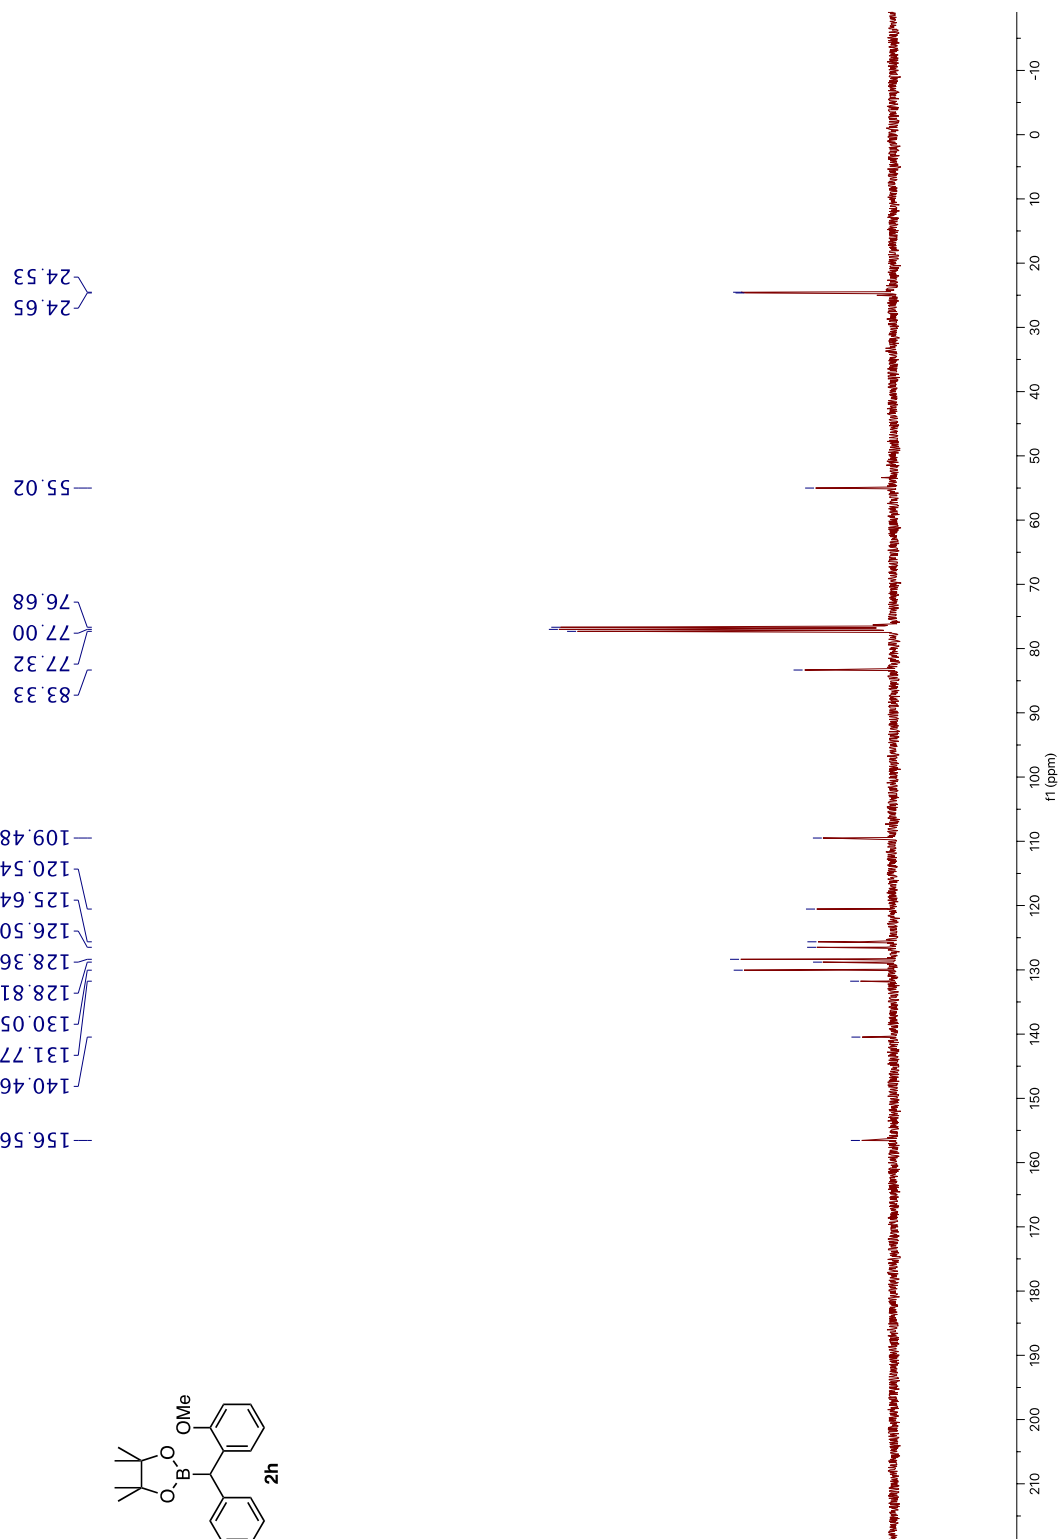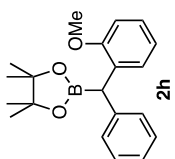



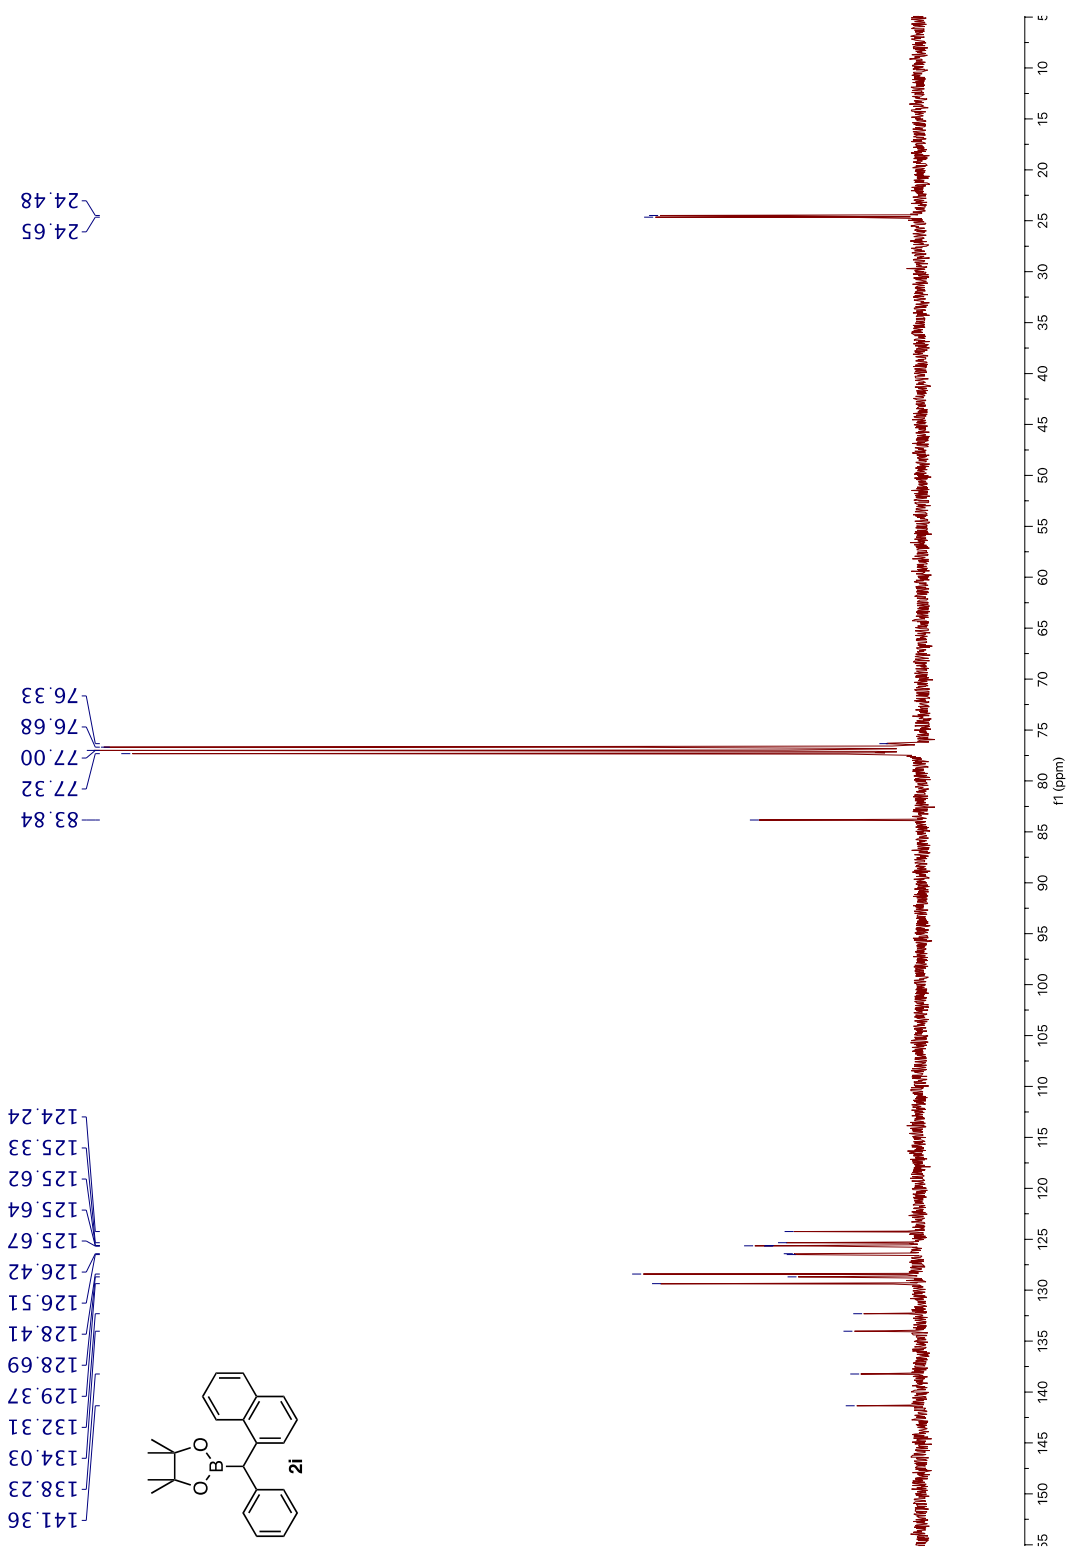



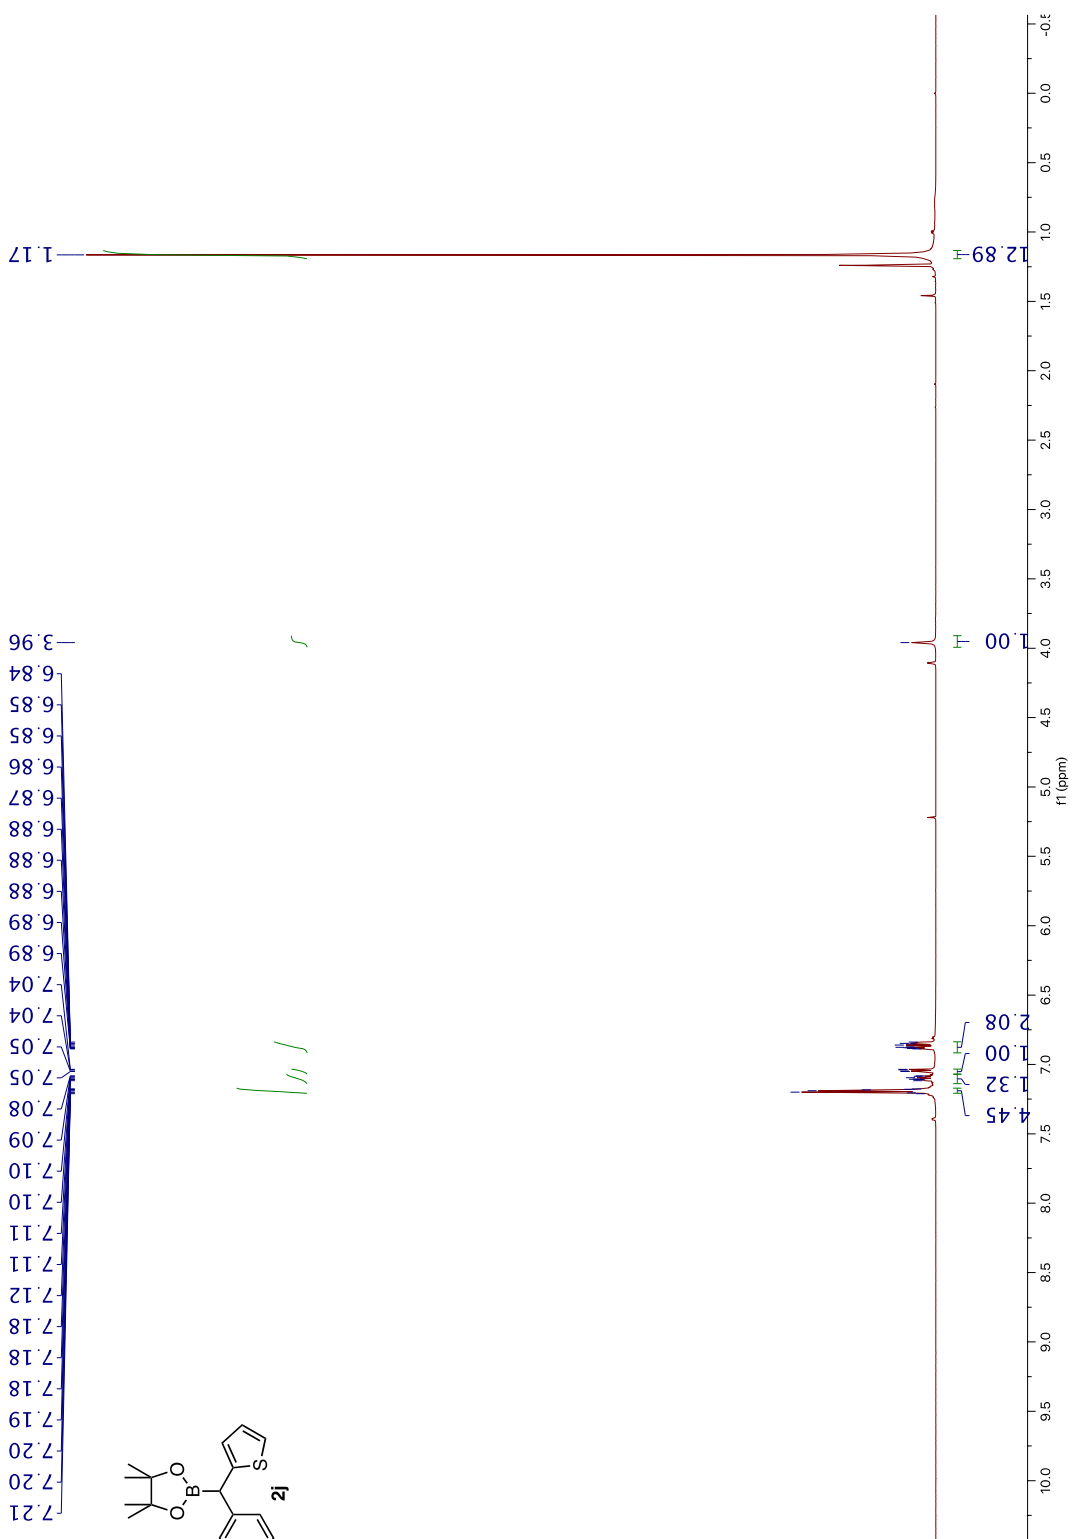

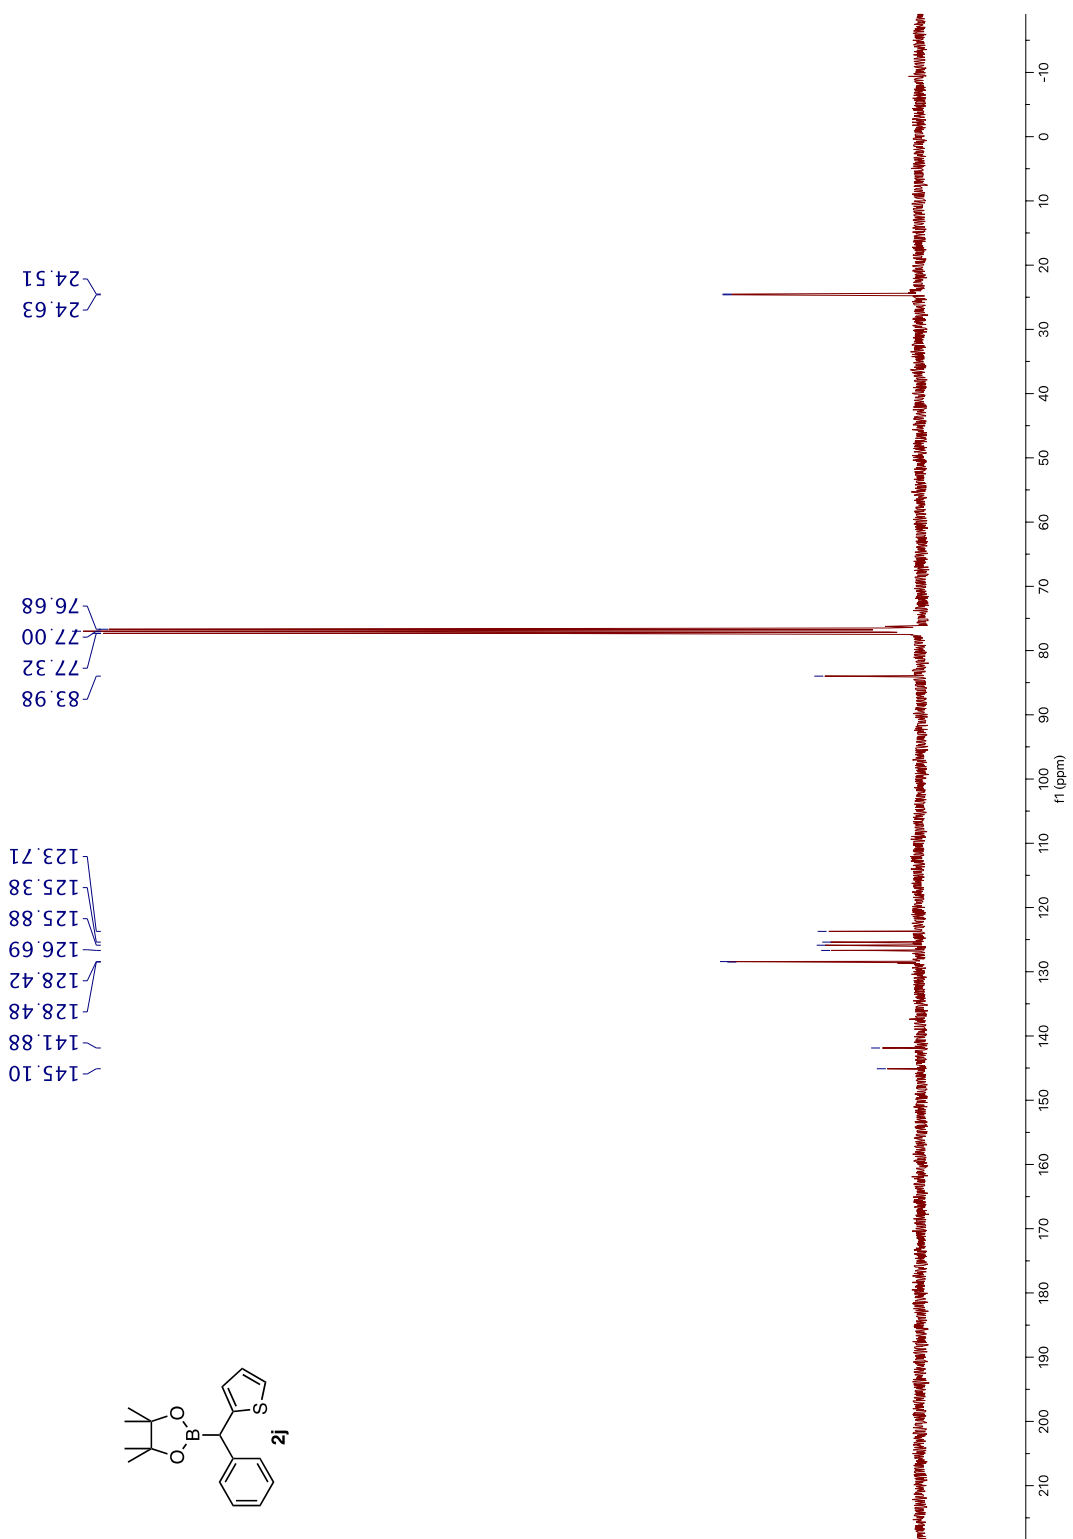

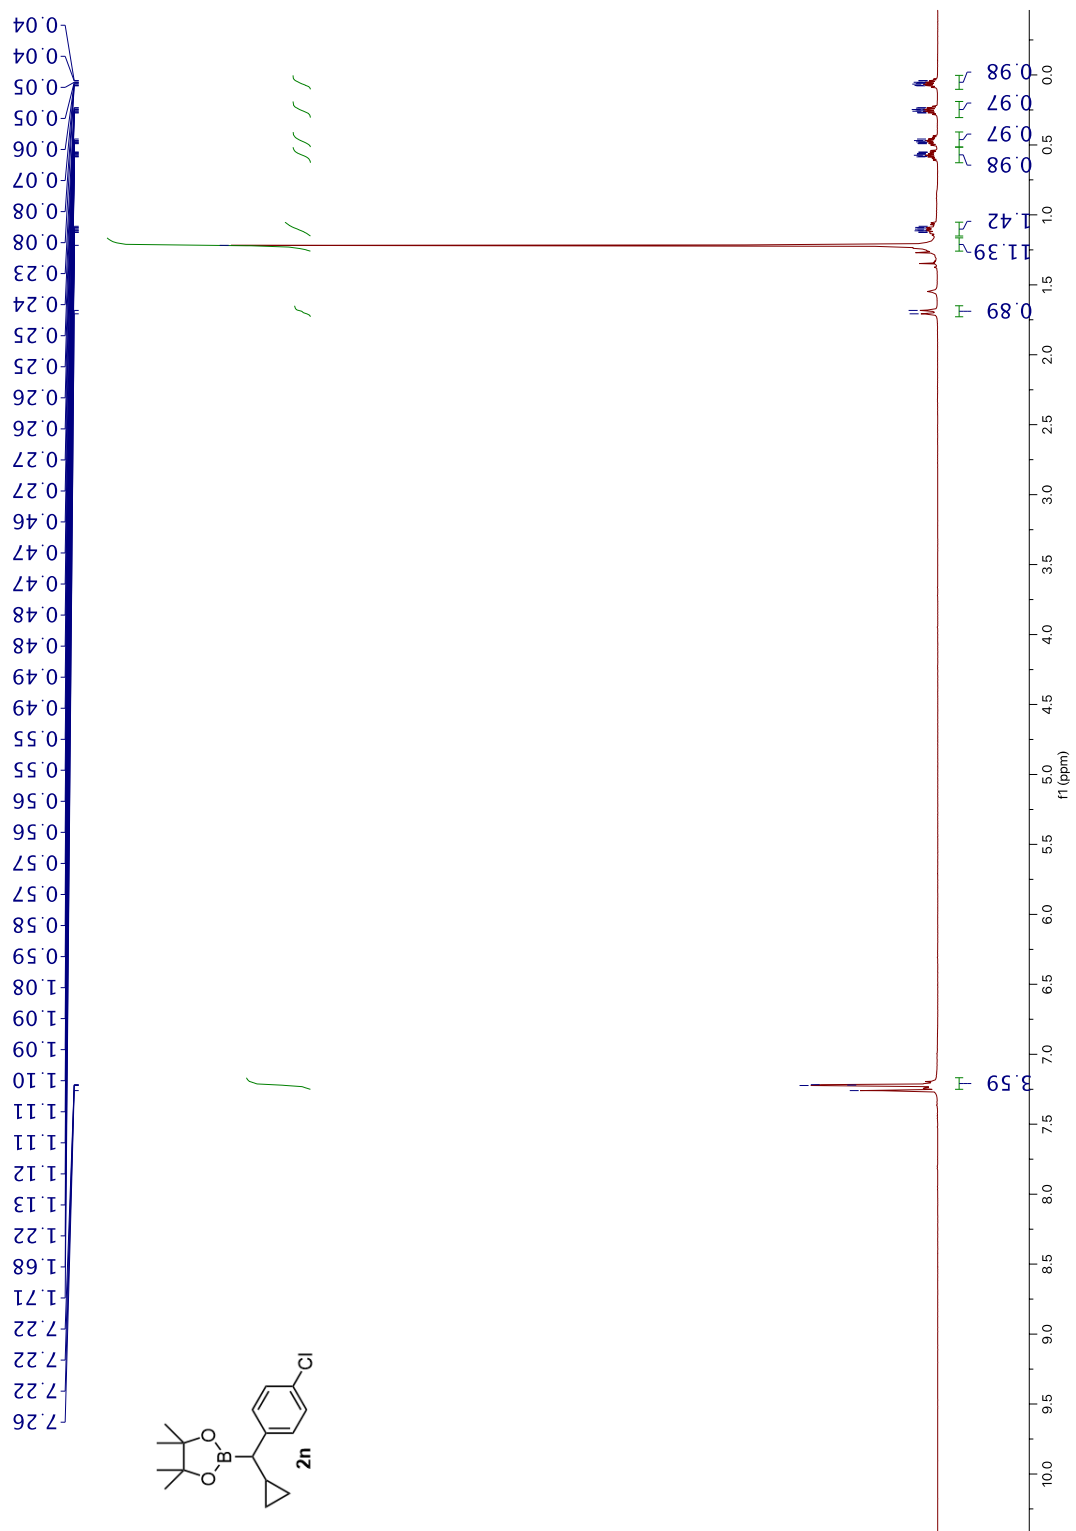

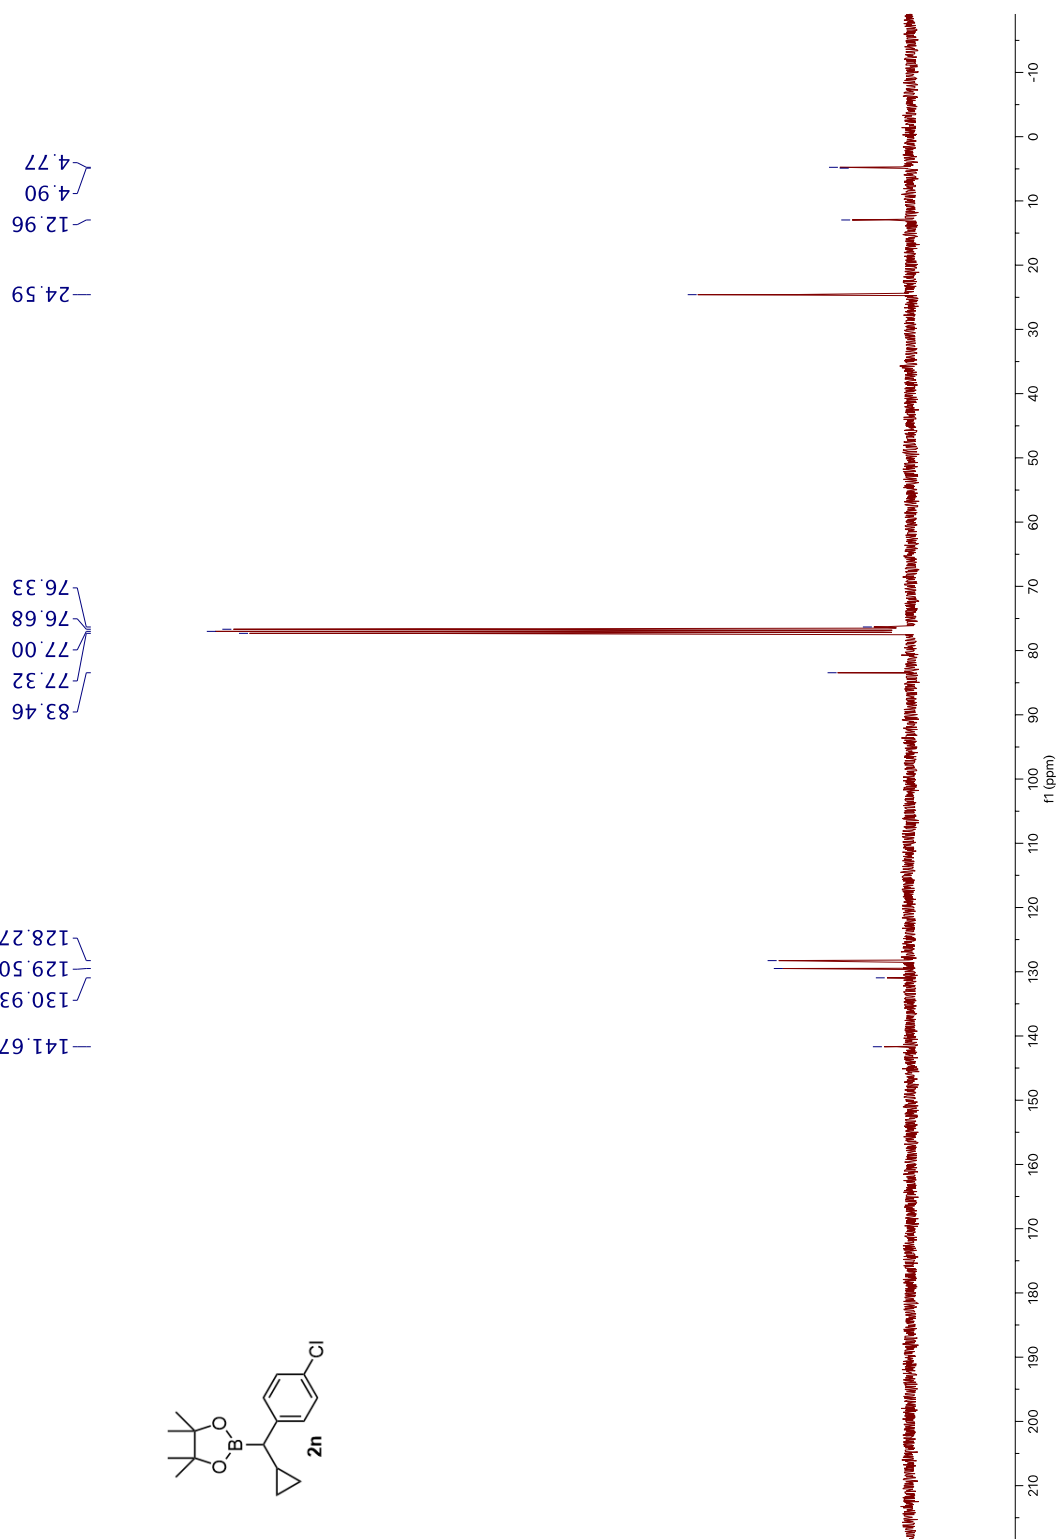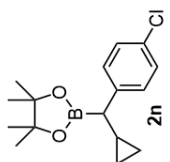

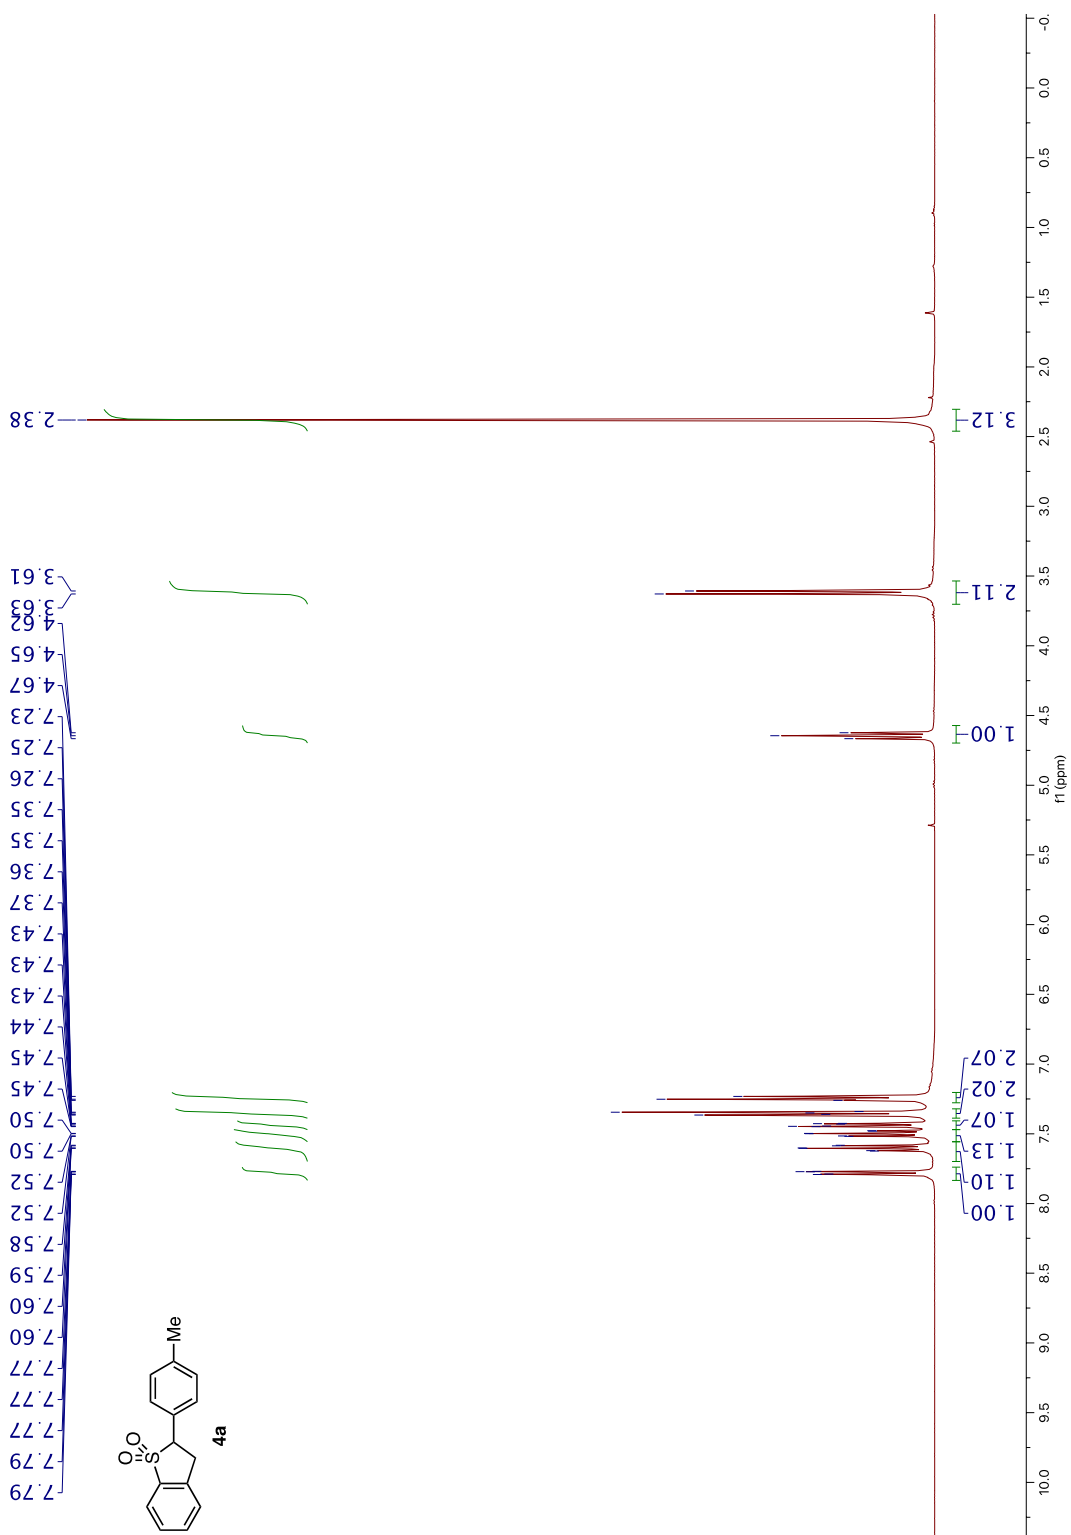

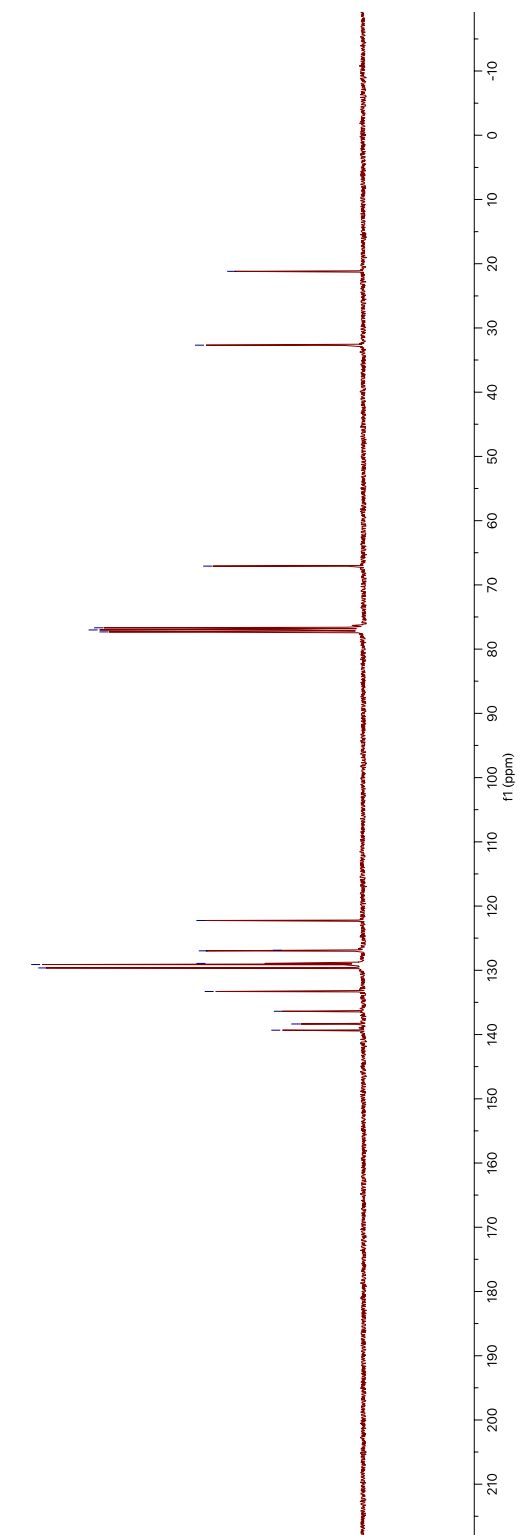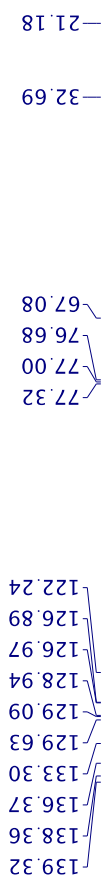

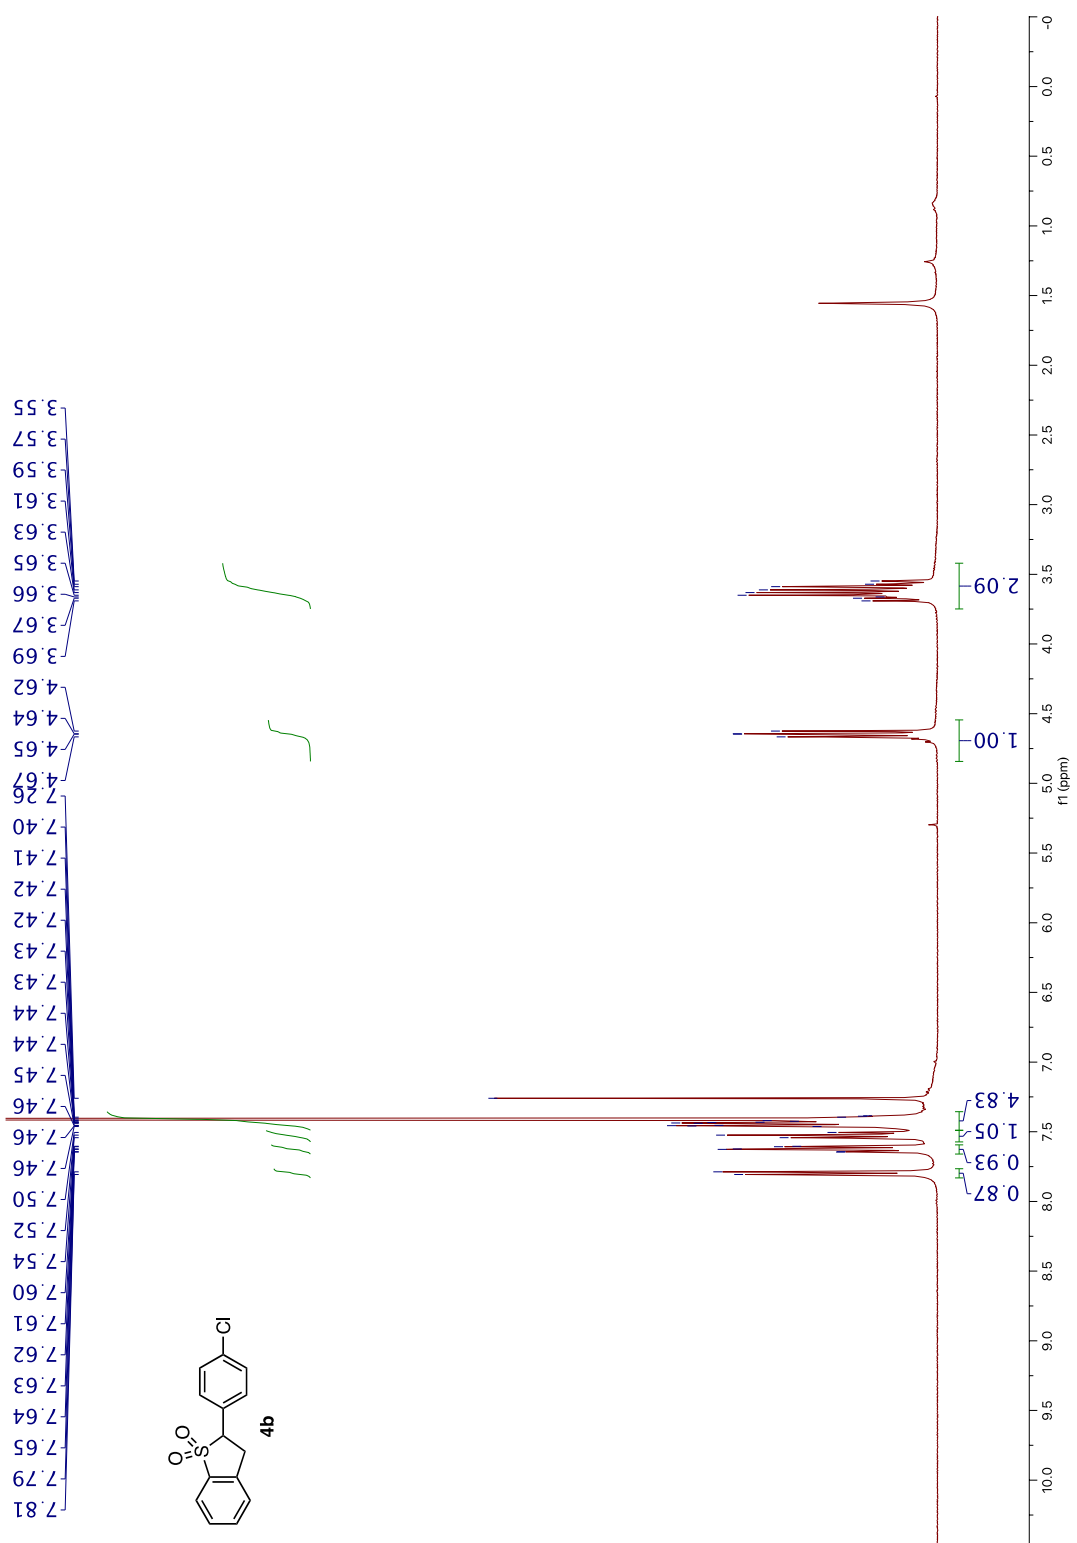

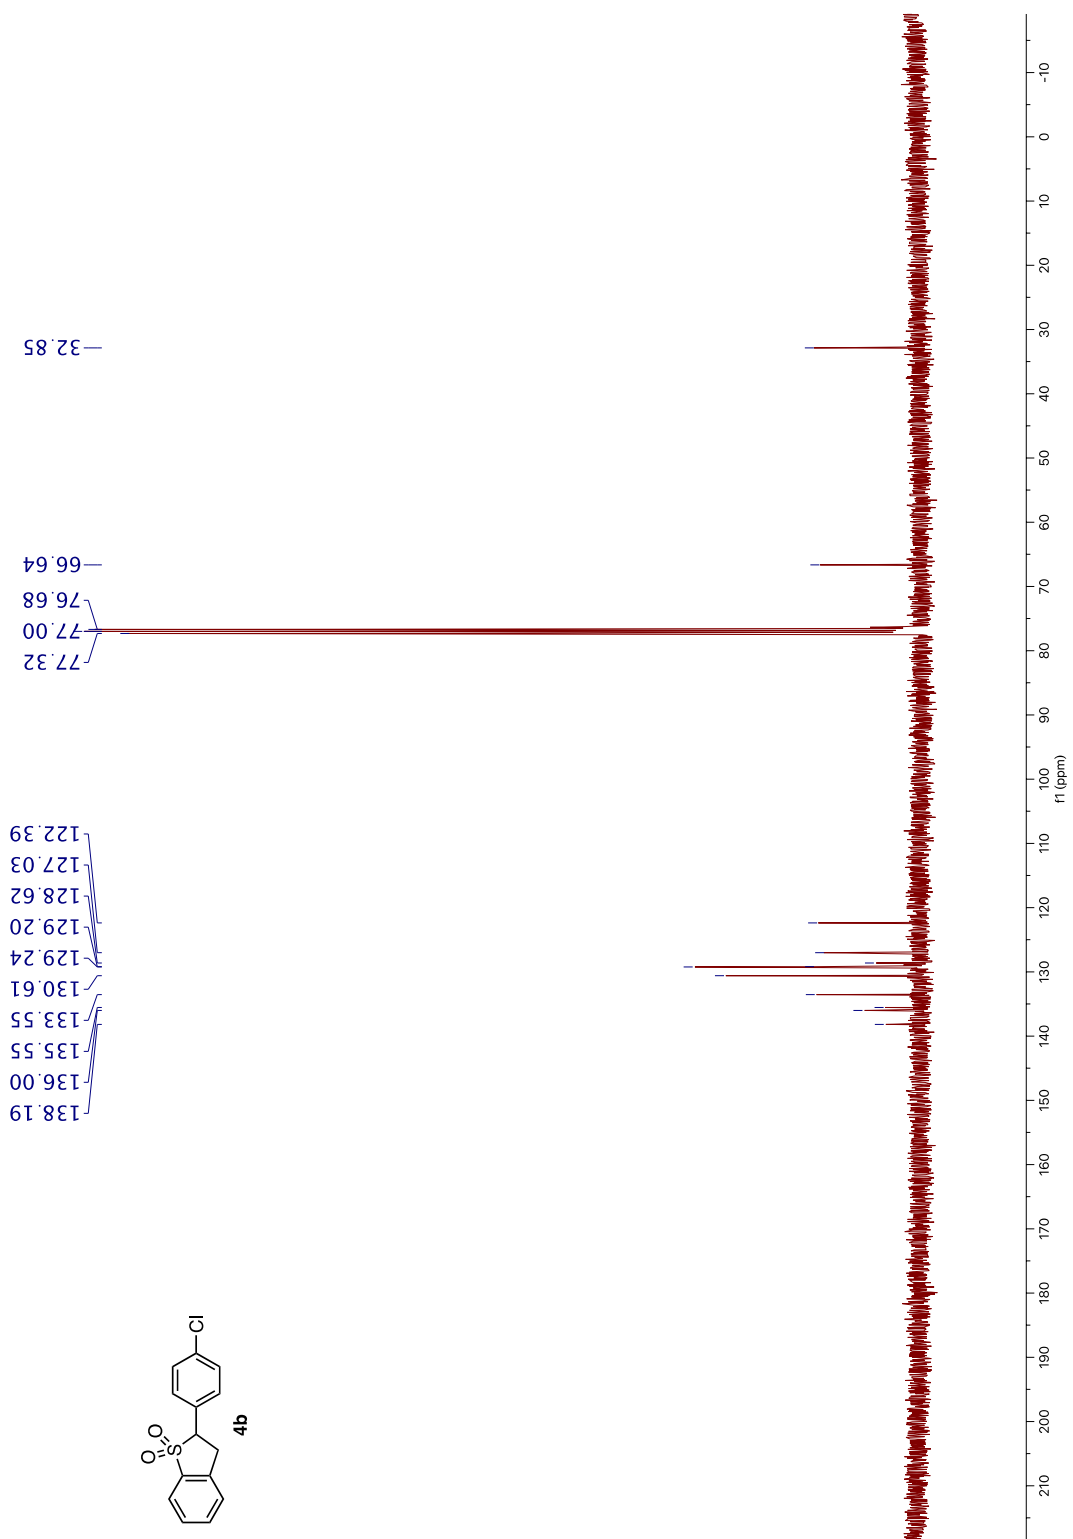



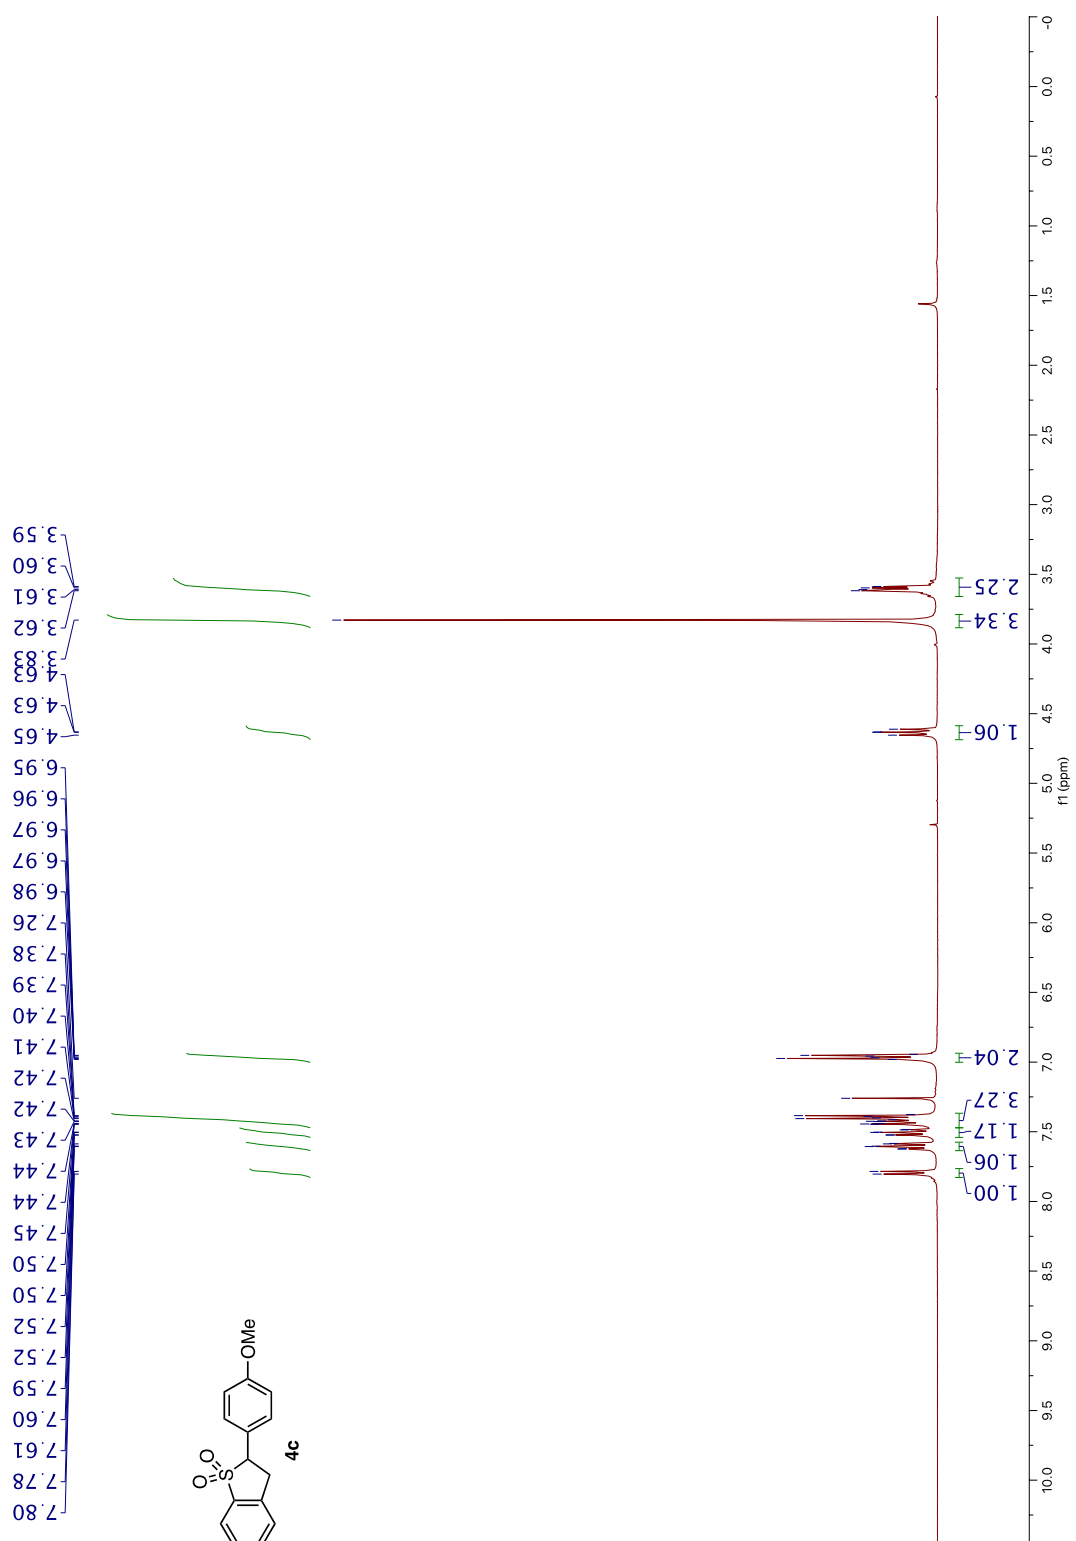

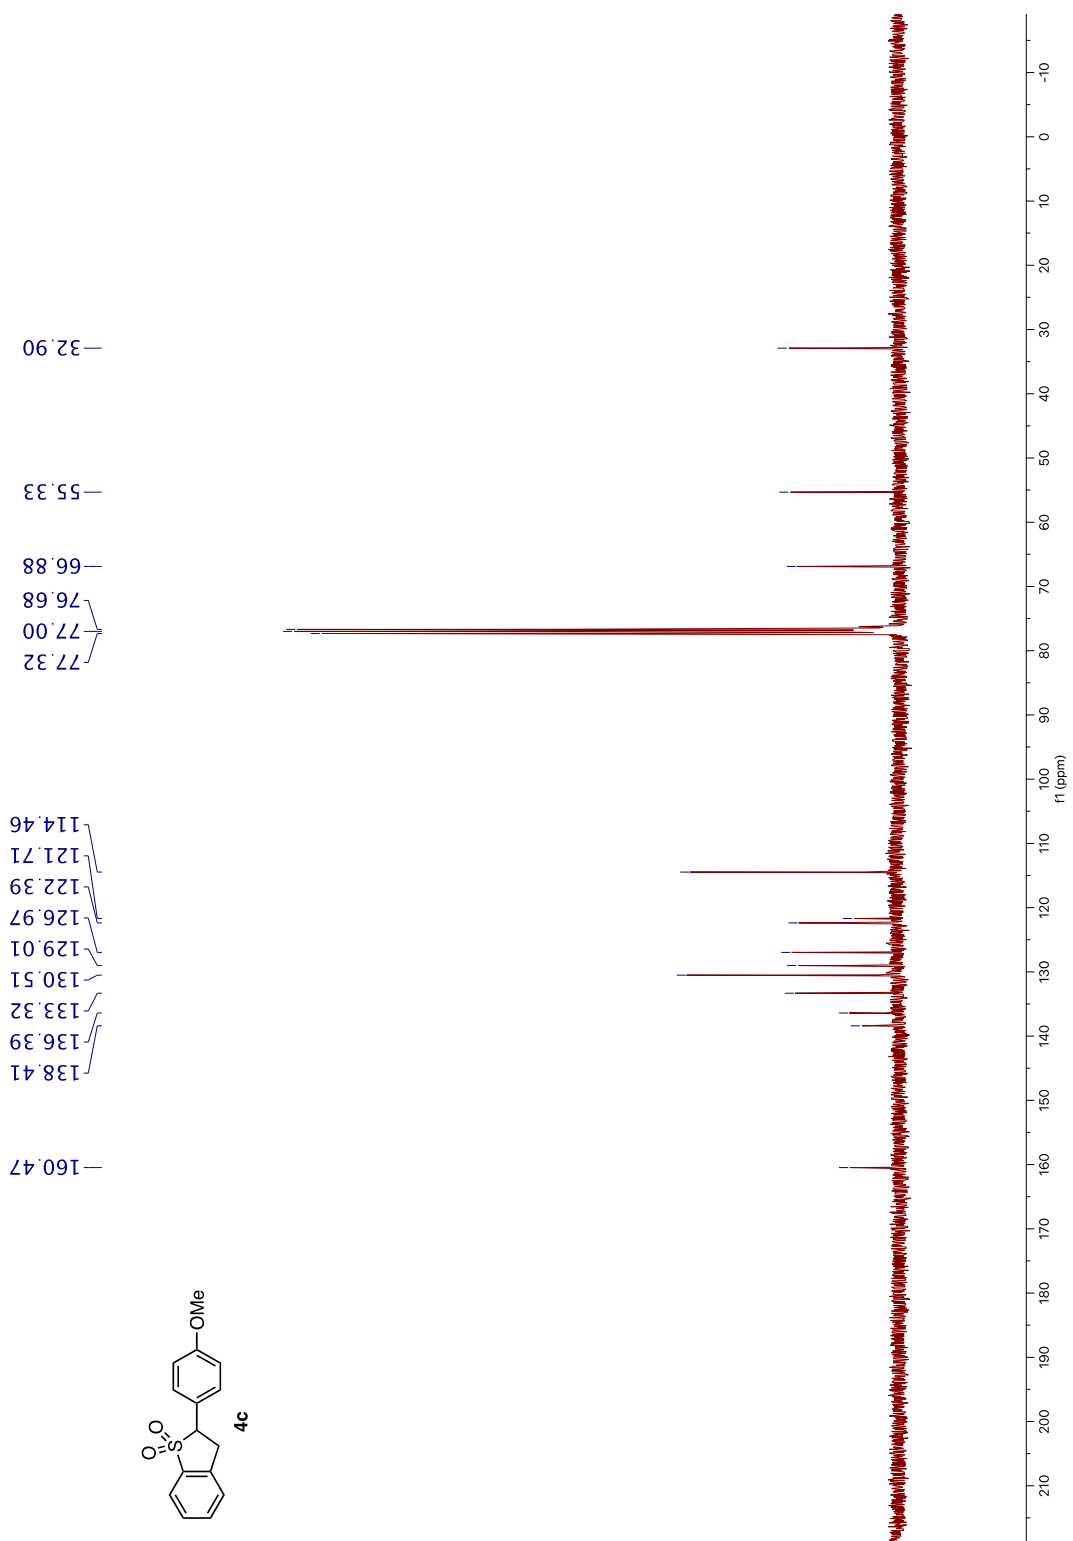

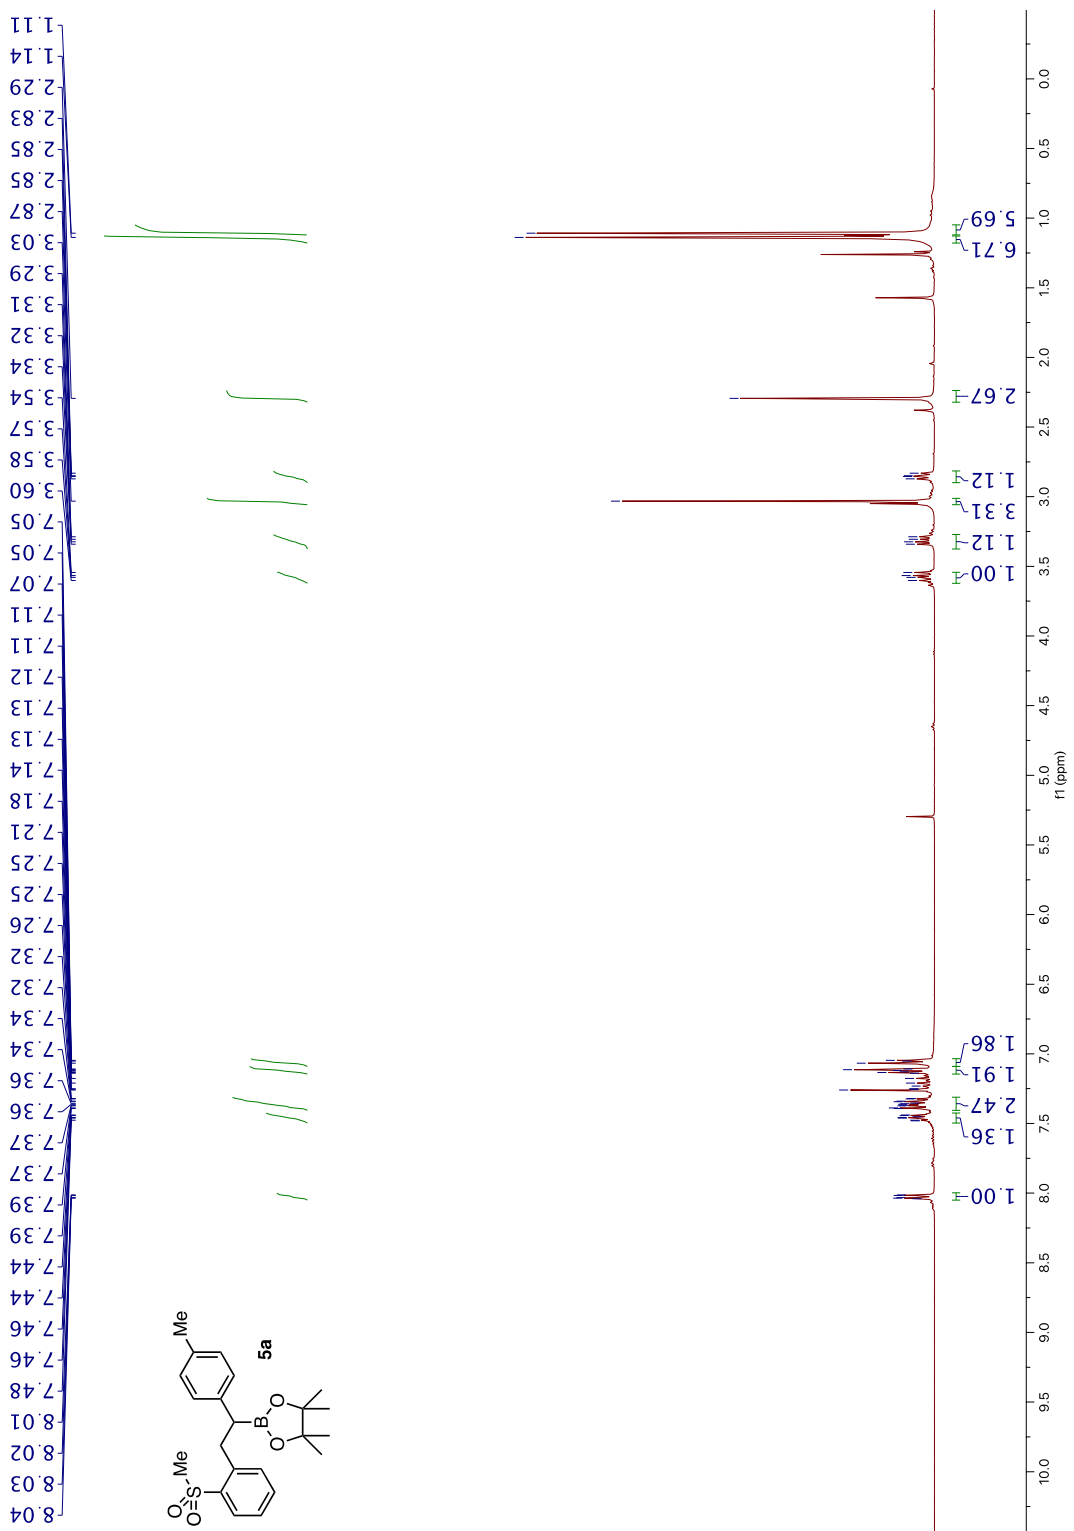

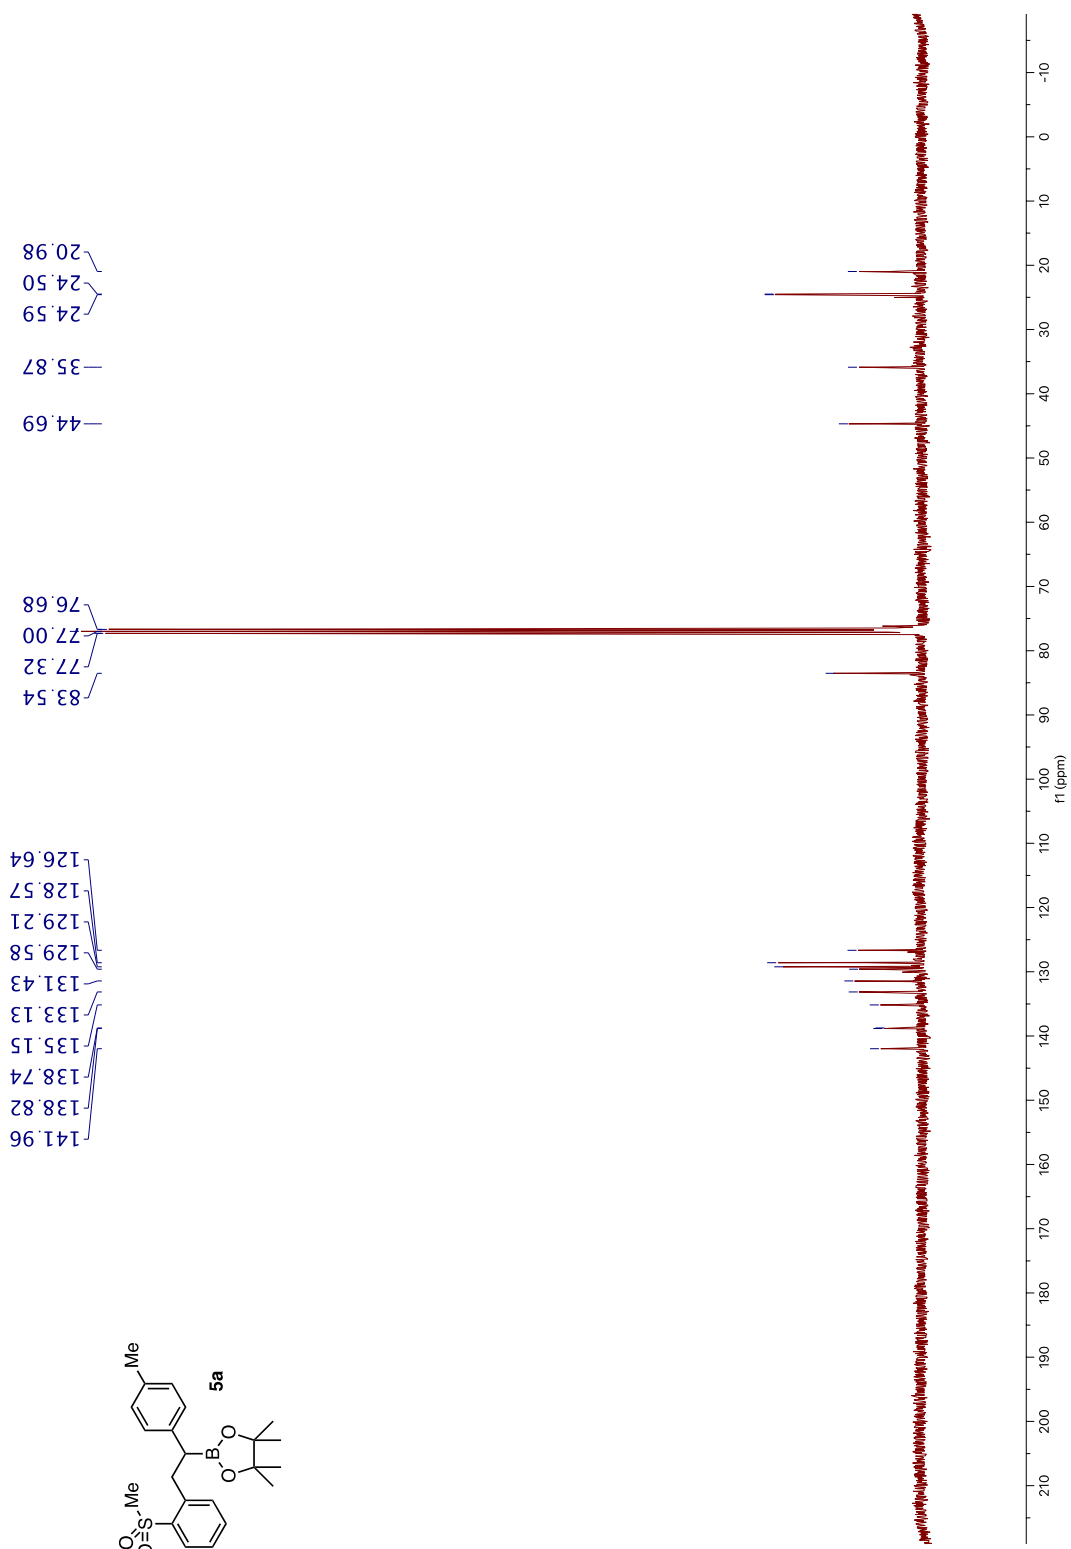

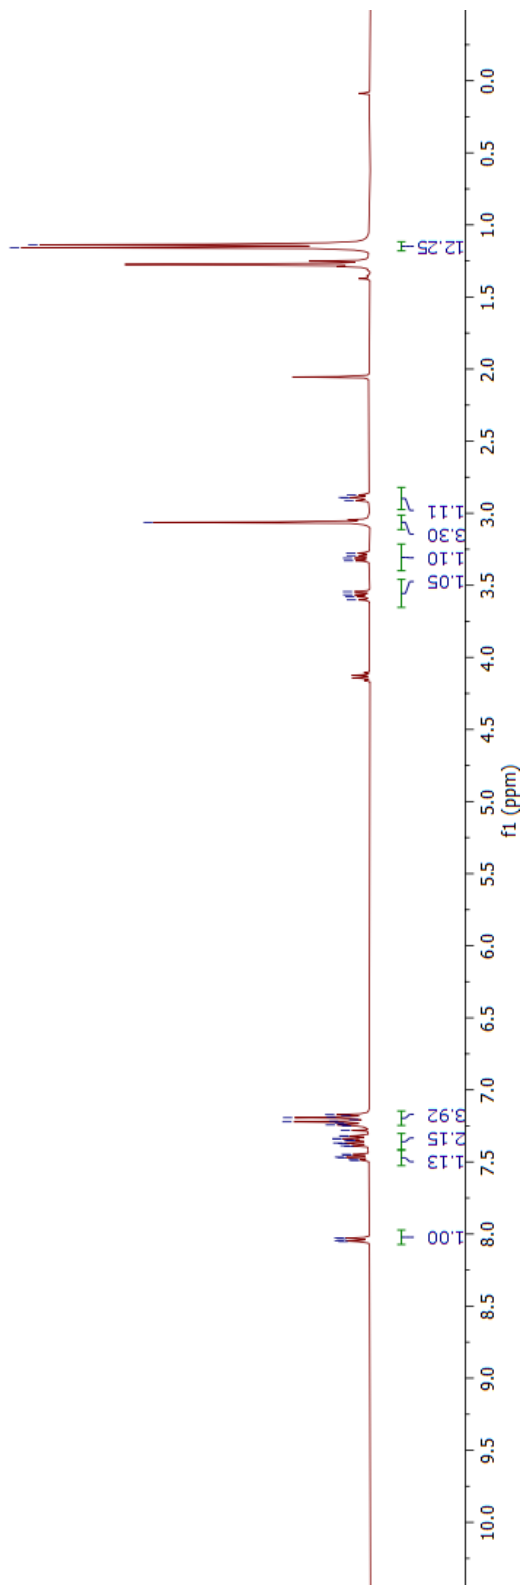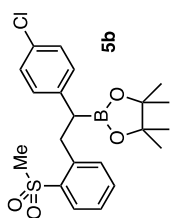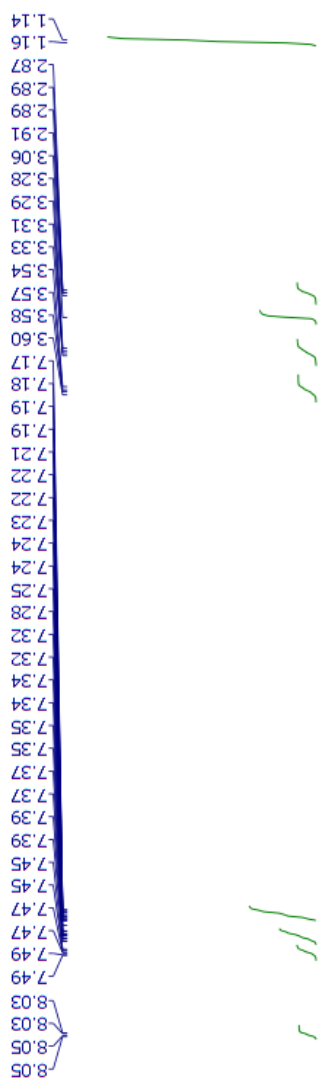

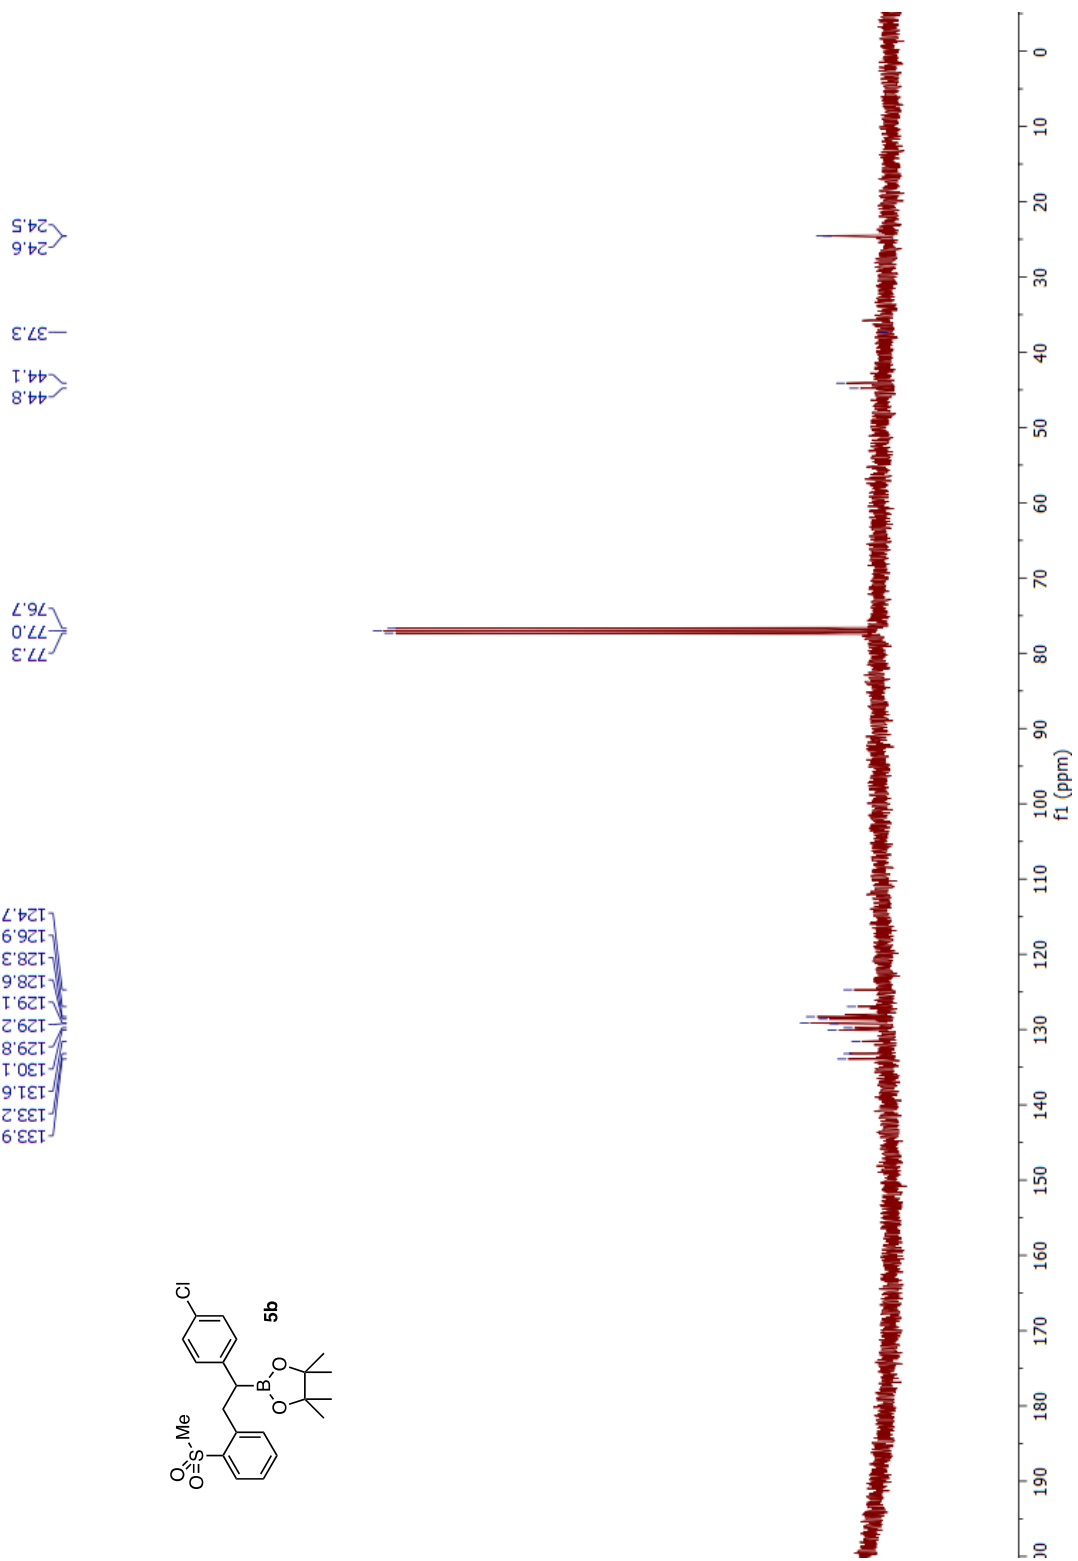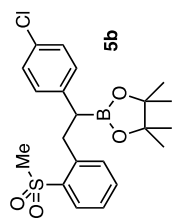

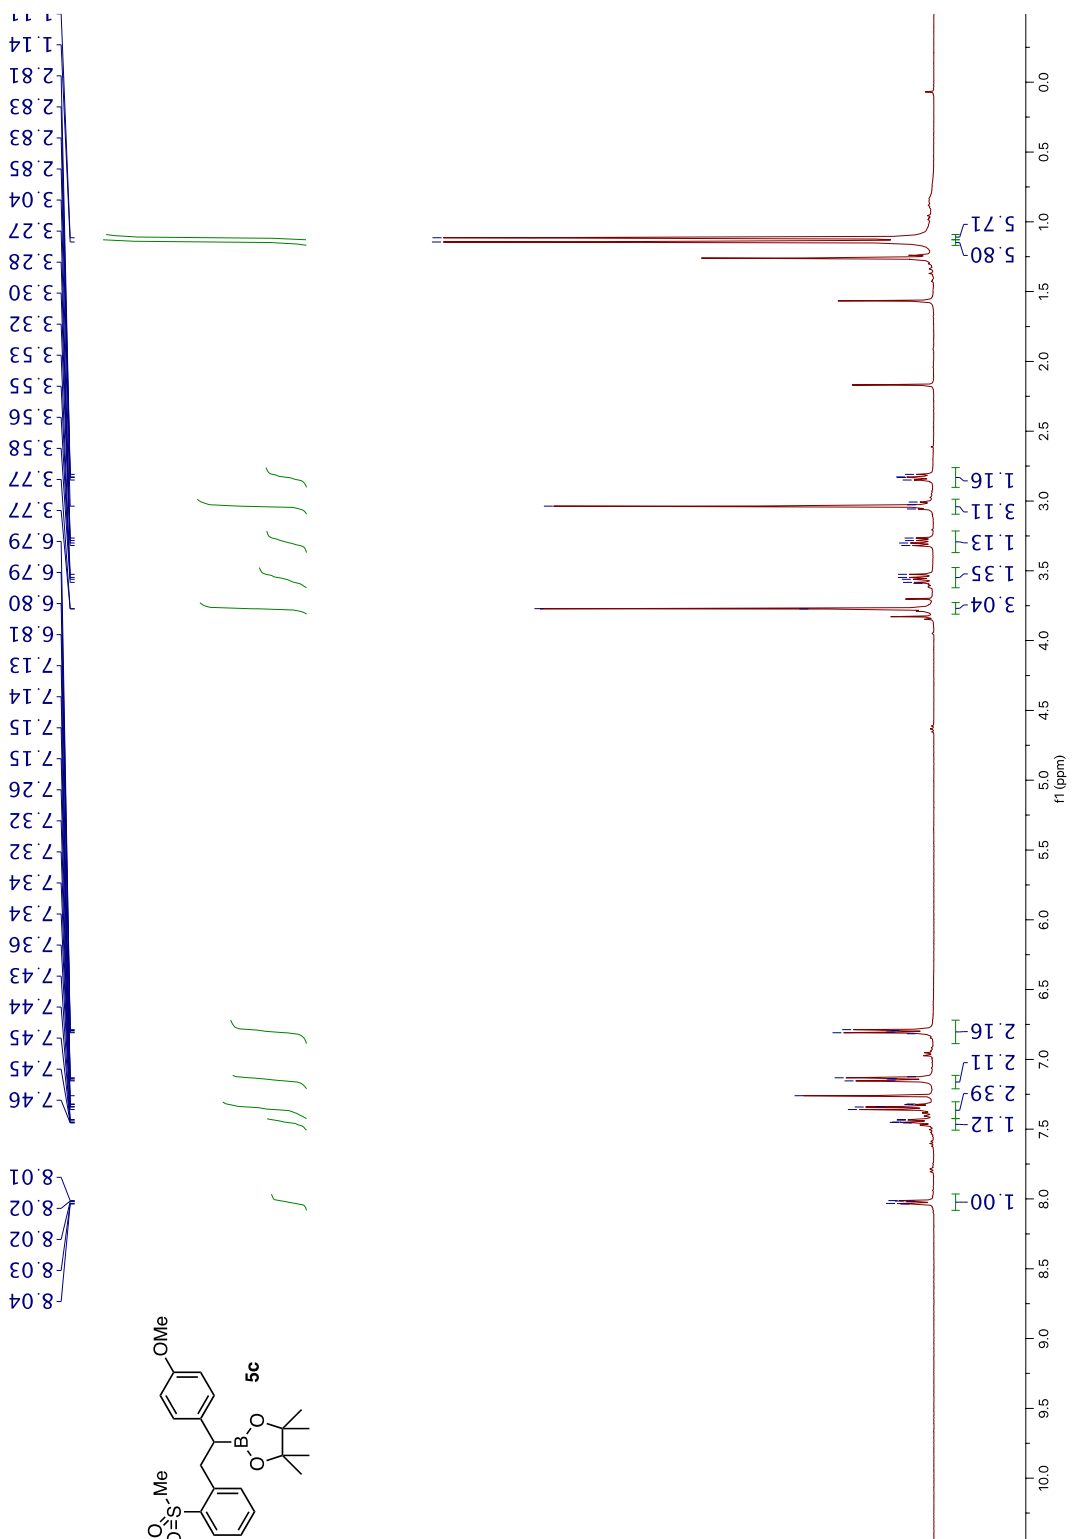

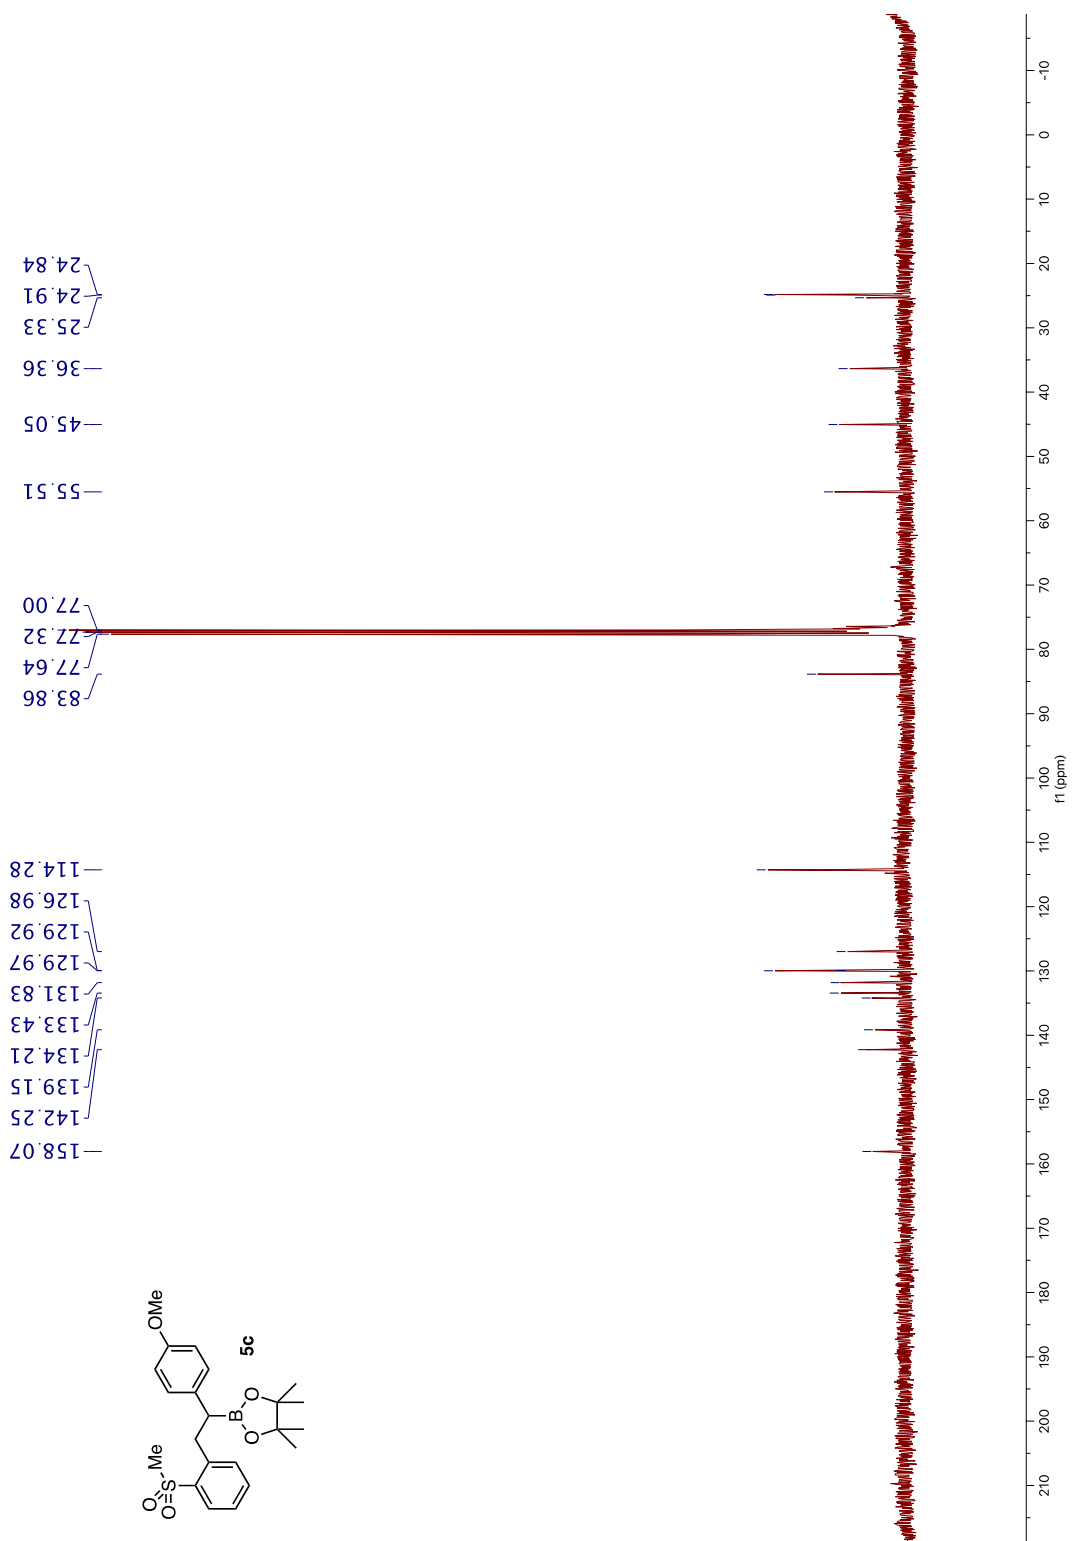



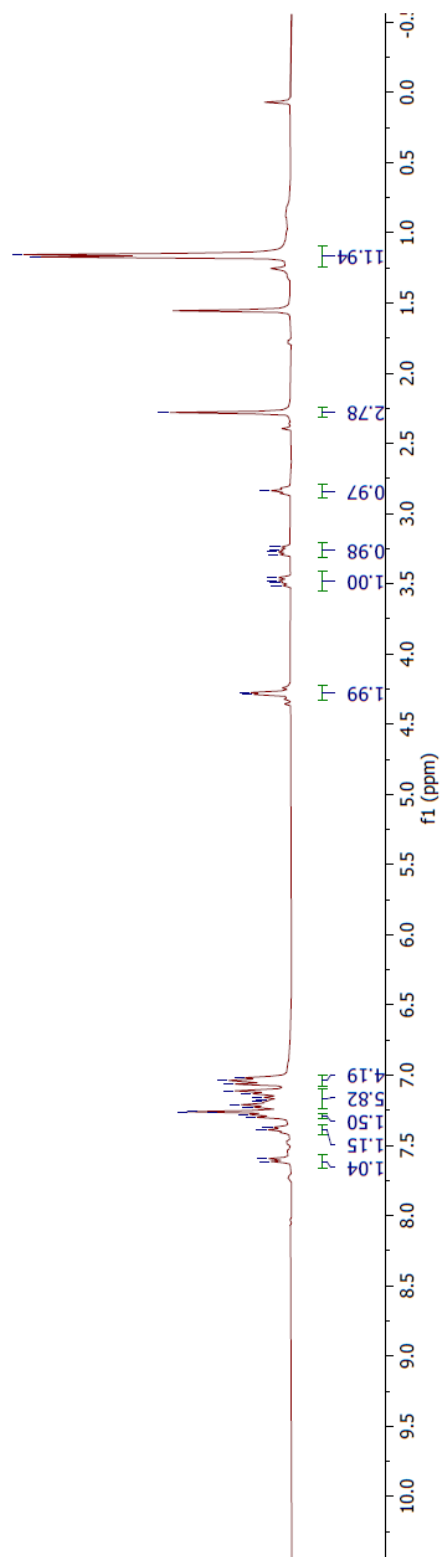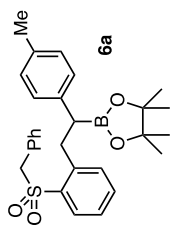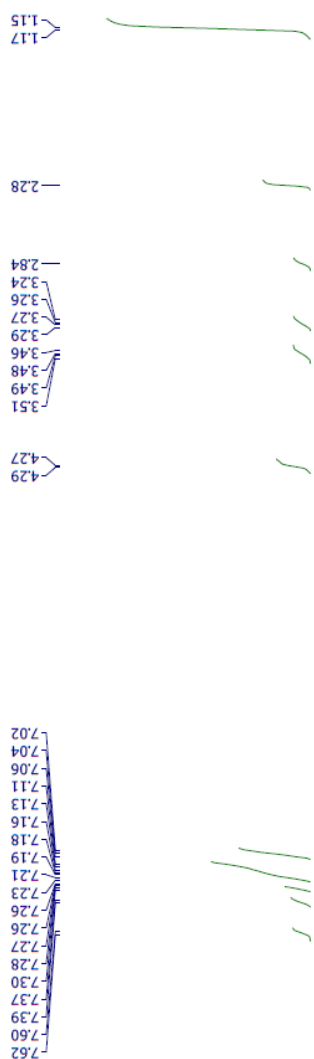

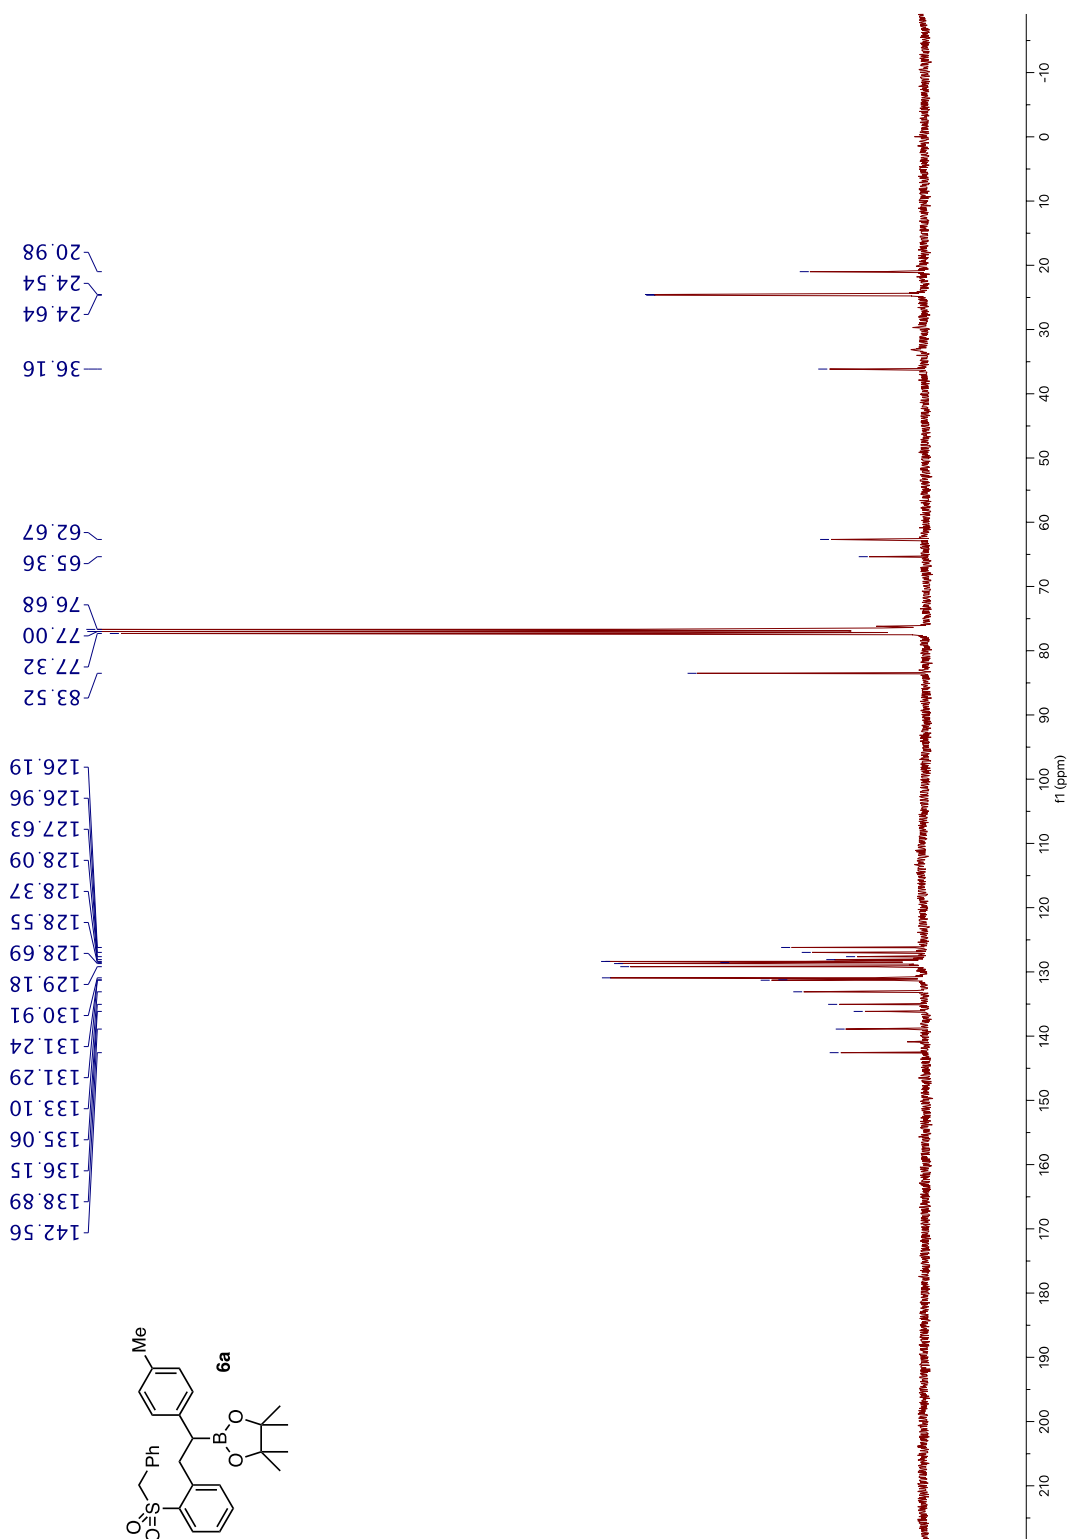

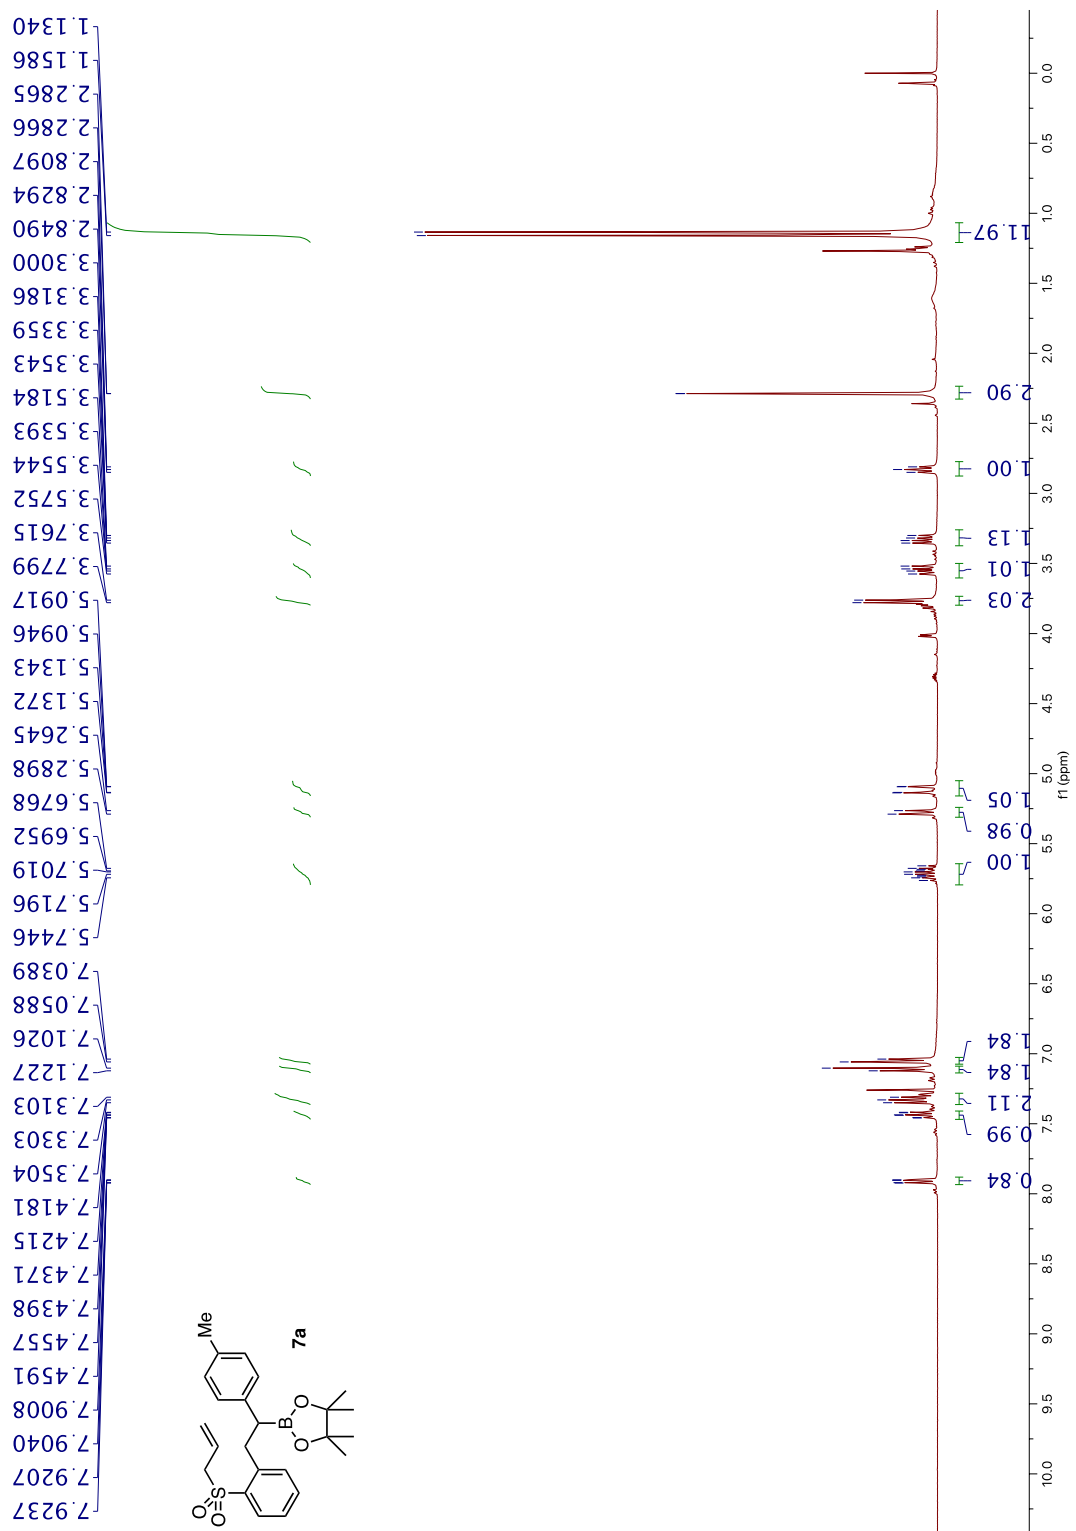

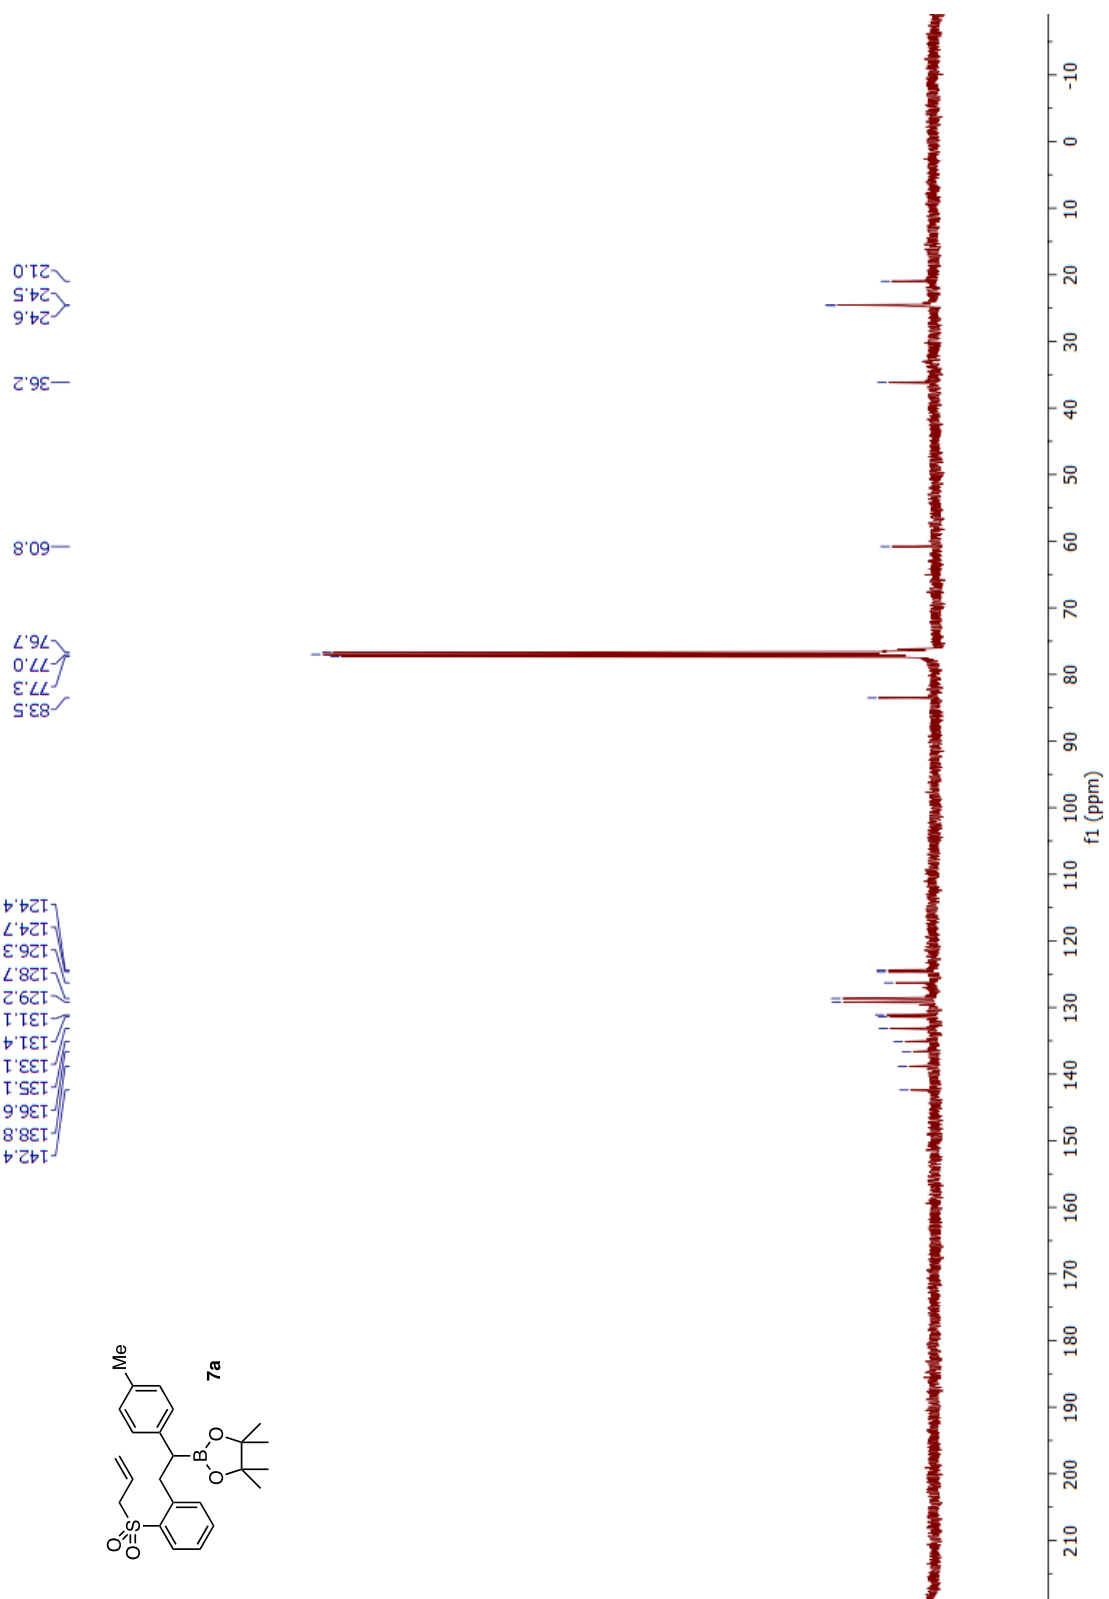

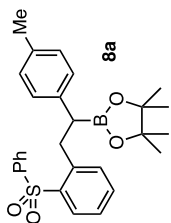

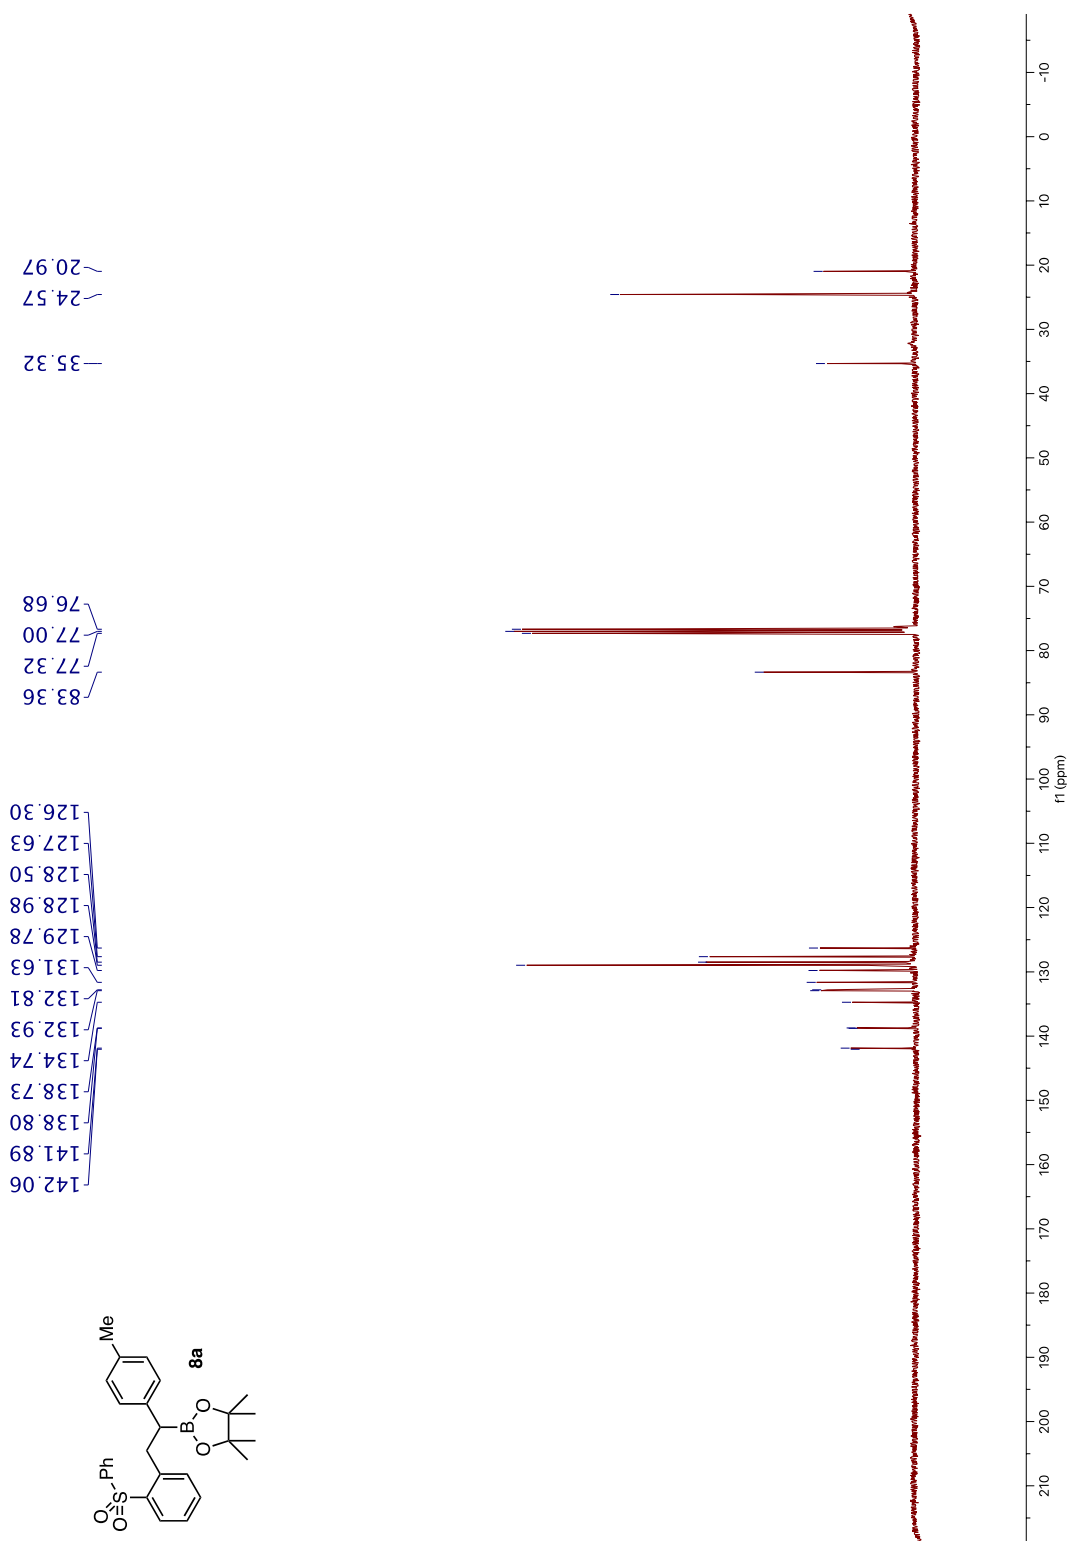

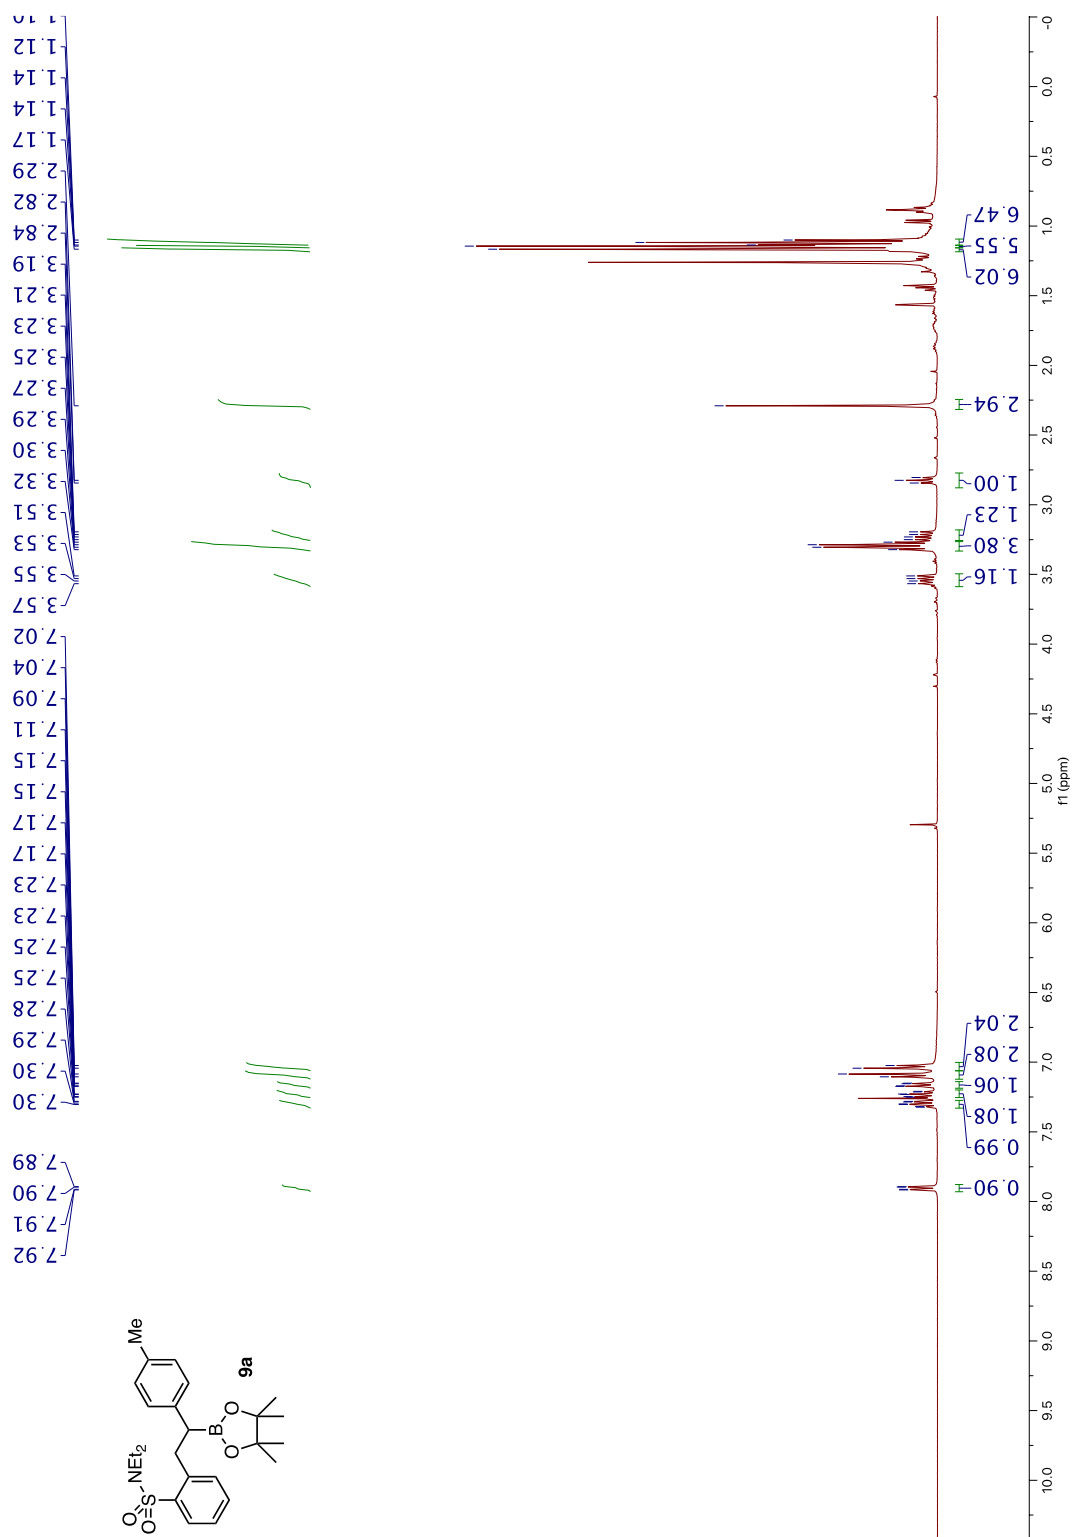

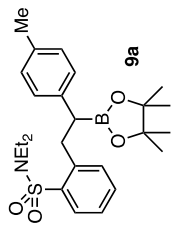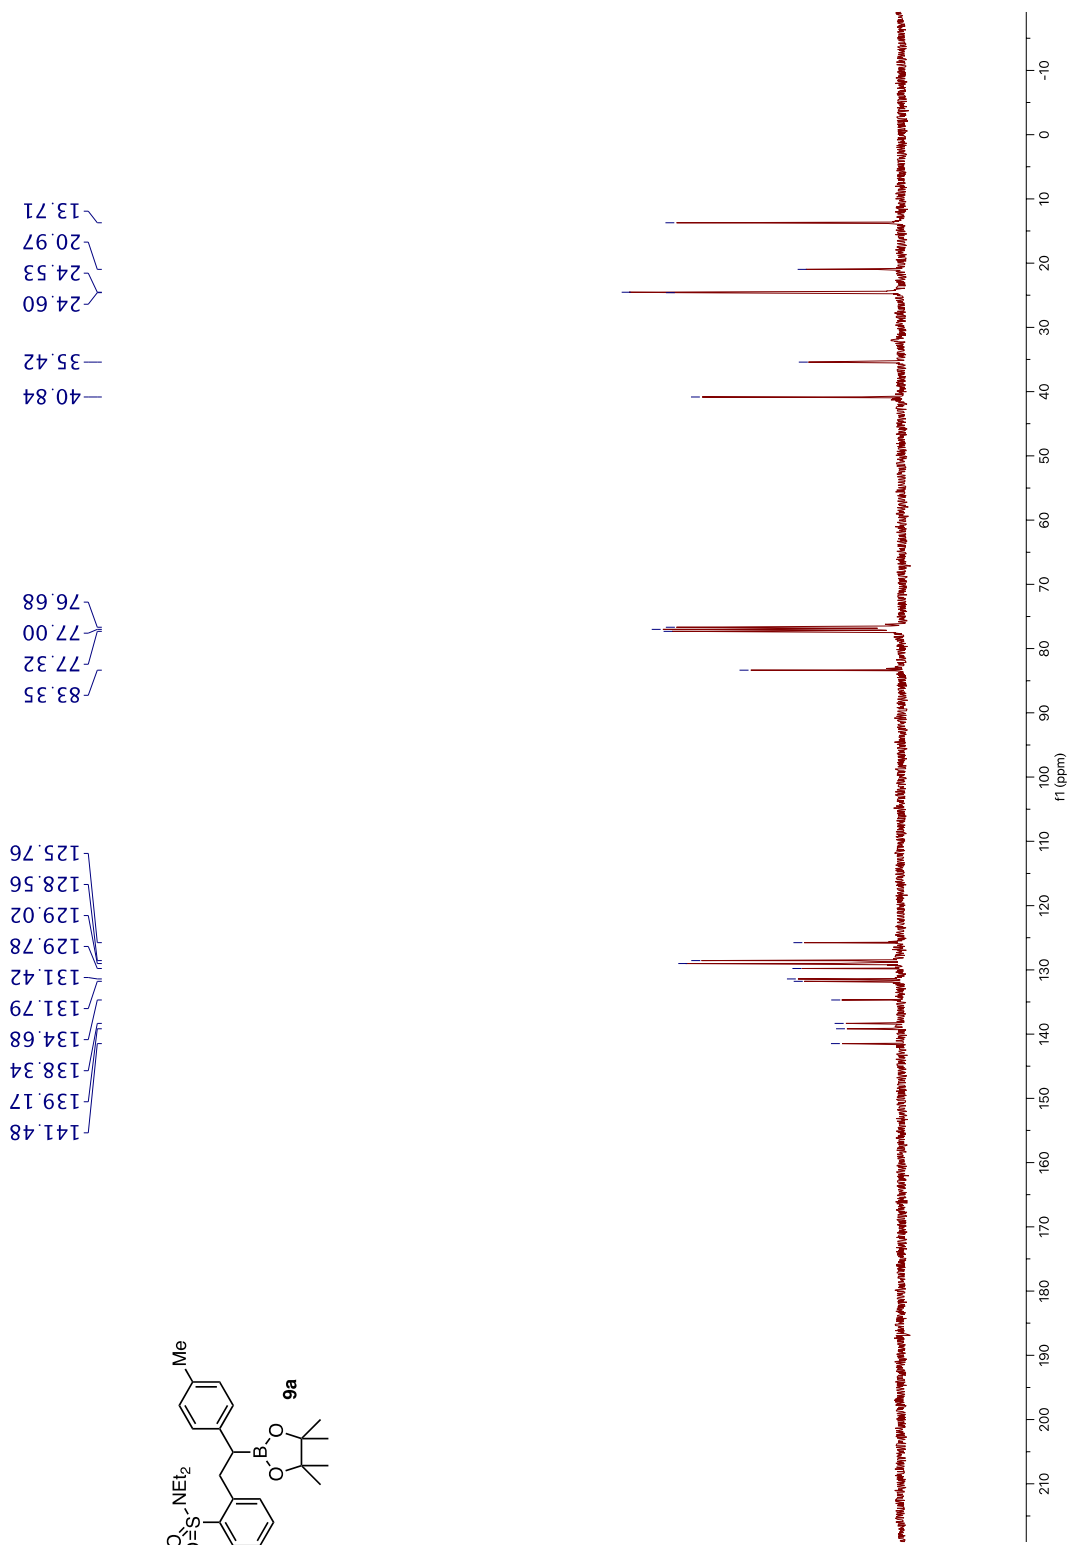

Supplement: c9ob01099h2.pdf [file c9ob01099h2.pdf]
